# Supplementary material for: Asymmetric synthesis of chloroisothreonine derivatives via syn-stereoselective Mannich-type additions across N-sulfinyl-α-chloroimines
Source: Royal Society of Chemistry journal article supplement (doi:10.1039/c4ob00243a), 2014-01-01

**Asymmetric Synthesis of Chloroisotheonine Derivatives**  
**via *syn*-Stereoselective Mannich-type Additions**  
**across *N*-Sulfinyl- $\alpha$ -chloroimines**

Gert Callebaut,<sup>‡a</sup> Filip Colpaert,<sup>§a</sup> Melinda Nonn,<sup>b</sup> Loránd Kiss,<sup>b</sup> Reijo Sillanpää,<sup>c</sup> Karl W. Törnroos,<sup>d</sup> Ferenc Fülöp,<sup>b</sup> Norbert De Kimpe<sup>a</sup> and Sven Mangelinckx<sup>\*a</sup>

<sup>a</sup>*Department of Sustainable Organic Chemistry and Technology, Faculty of Bioscience Engineering, Ghent University, Coupure Links 653, B-9000 Ghent, Belgium*

*Sven.Mangelinckx@UGent.be*

**Supporting Information**

***Table of Contents***

|                                                                                                                                                           |     |
|-----------------------------------------------------------------------------------------------------------------------------------------------------------|-----|
| I. General methods .....                                                                                                                                  | S-2 |
| II. Copies of <sup>1</sup> H NMR and <sup>13</sup> C NMR spectra of <b>3c</b> , <b>5</b> , <b>6</b> , <b>7</b> , <b>9</b> , <b>10</b> and <b>11</b> ..... | S-3 |

---

\* To whom correspondence should be addressed. Tel: +32 (0)9 264 59 51. Fax: +32 (0)9 264 62 21.

‡ Aspirant of the “Institute for Promotion of Innovation through Science and Technology – Flanders (IWT-Vlaanderen)”.

§ Postdoctoral Fellow of the Research Foundation – Vlaanderen (FWO).

<sup>b</sup> Institute of Pharmaceutical Chemistry, University of Szeged, H-6701 Szeged, P.O. Box 427, Hungary.

<sup>c</sup> Department of Chemistry, University of Jyväskylä, Fin-40351 Jyväskylä, Finland.

<sup>d</sup> Department of Chemistry, University of Bergen, Allégt. 41, N-5007 Bergen, Norway.

## I. General methods

Flame-dried glassware was used for all non-aqueous reactions. Commercially available solvents and reagents were purchased from common chemical suppliers and used without further purification, unless stated otherwise. Tetrahydrofuran (THF) and diethyl ether (Et<sub>2</sub>O) were freshly distilled under a nitrogen atmosphere from sodium/benzophenone ketyl, whereas dichloromethane (CH<sub>2</sub>Cl<sub>2</sub>) was distilled from calcium hydride. Petroleum ether refers to the 40-60 °C boiling fraction. <sup>1</sup>H NMR (300 MHz), <sup>13</sup>C NMR (75 MHz) spectra were recorded in deuterated solvents with tetramethylsilane (TMS, δ = 0 ppm) as internal standard unless specified otherwise. Mass spectra were recorded using a direct inlet system (ESI, 4000 V). IR spectra were obtained from samples in neat form with an ATR (Attenuated Total Reflectance) accessory. Elementary analyses were performed using a CHNS/O elementary analyzer. HRMS analysis was performed using a HPLC coupled to a TOF-Mass Spectrometer equipped with ESI/APCI-multimode source. Melting points of crystalline compounds were determined in open-end capillary tubes using a hot stage apparatus and were not corrected. Optical rotations were determined at a wavelength of 589 nm. The purification of the reaction mixtures was performed by column chromatography with silica gel (particle size 0.035-0.070 mm, pore diameter ca. 6 nm). Thin layer chromatography (TLC) was performed on glass plates coated with silica gel 60 F<sub>254</sub>, using UV and KMnO<sub>4</sub> as a visualizing agent. The enantiopure reagents (*S*<sub>S</sub>)-*p*-toluenesulfinamide and (*R*<sub>S</sub>)- and (*S*<sub>S</sub>)-*tert*-butanesulfinamide were commercially available (ee > 98%).

## II. Copies of $^1\text{H}$ NMR and $^{13}\text{C}$ NMR spectra of 3c, 5, 6, 7, 9, 10 and 11

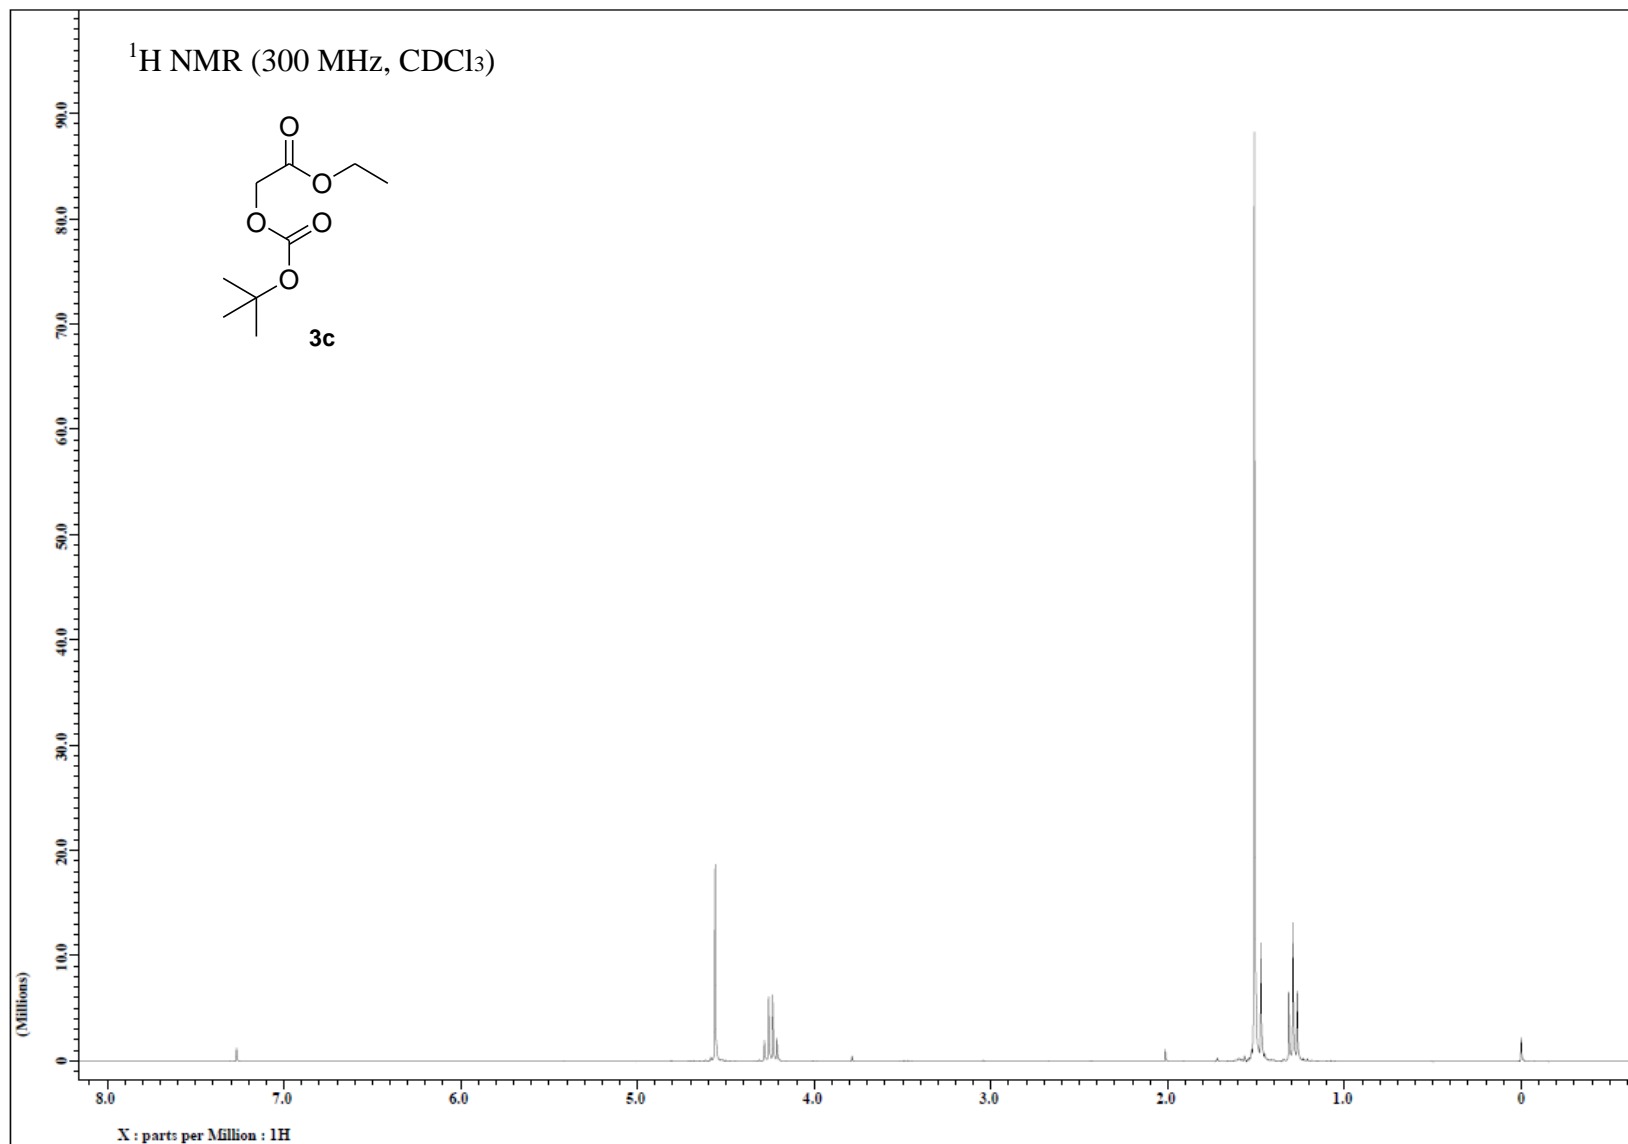

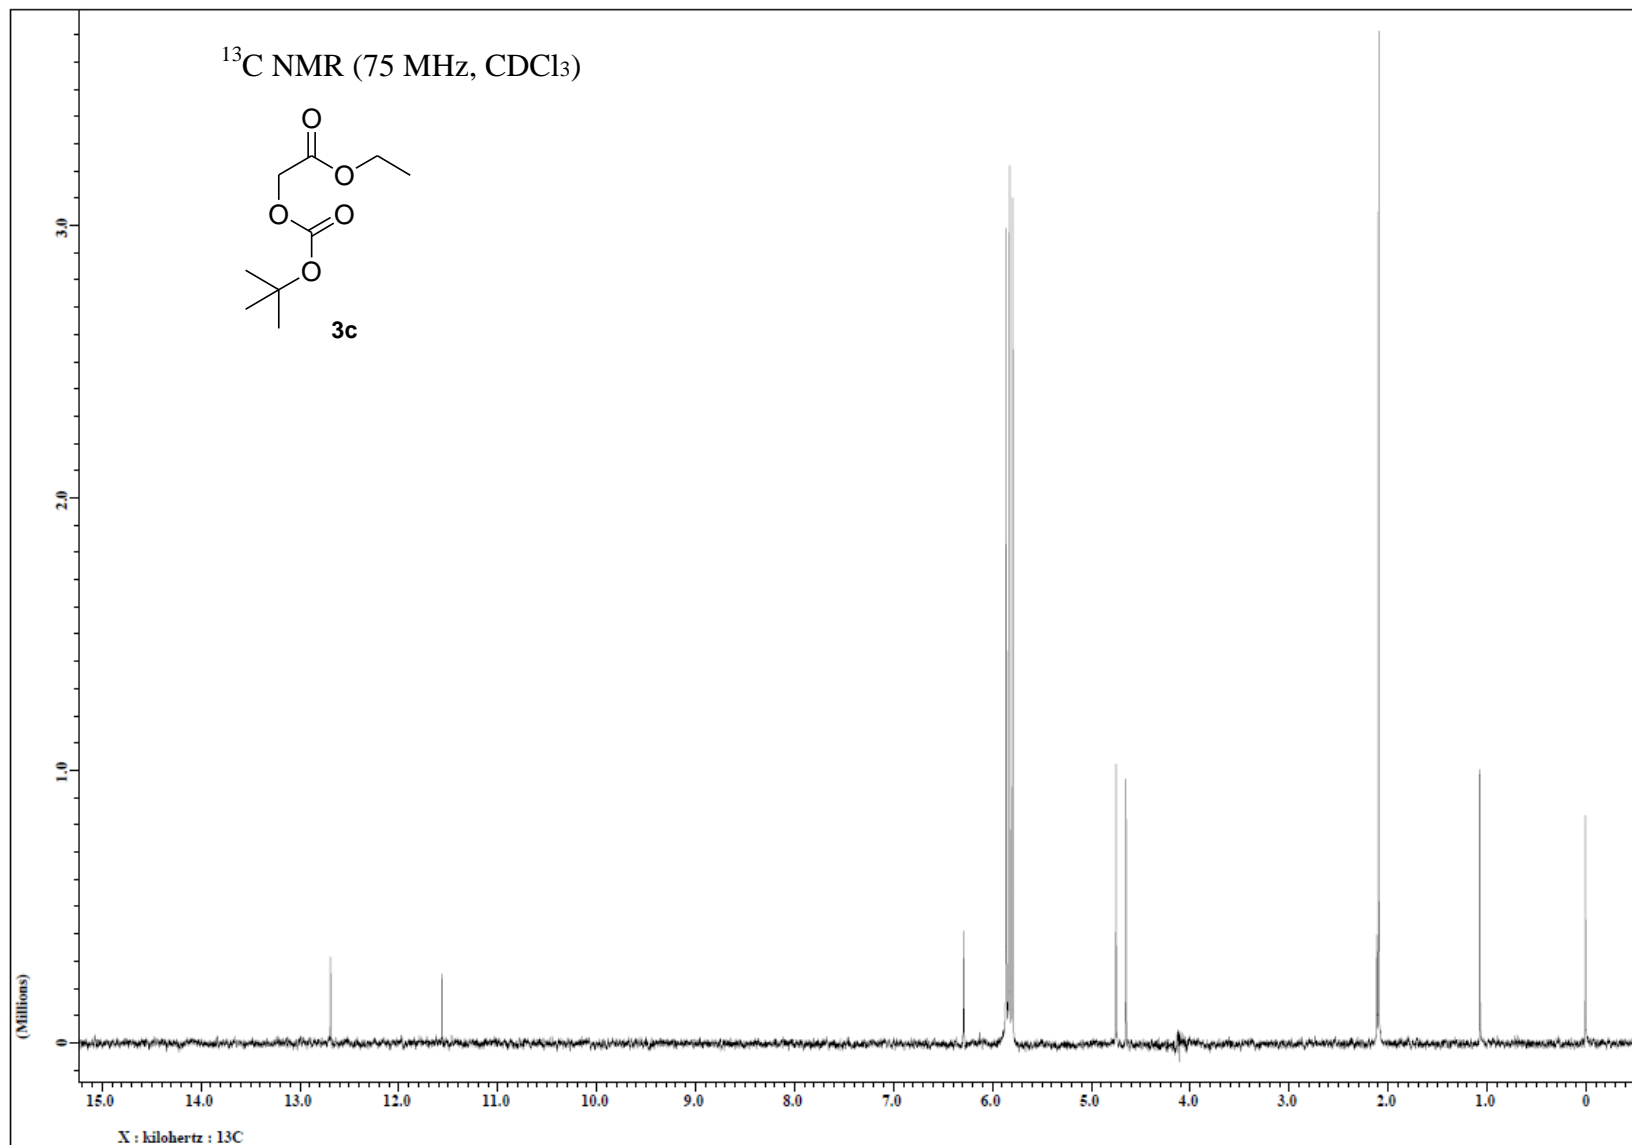

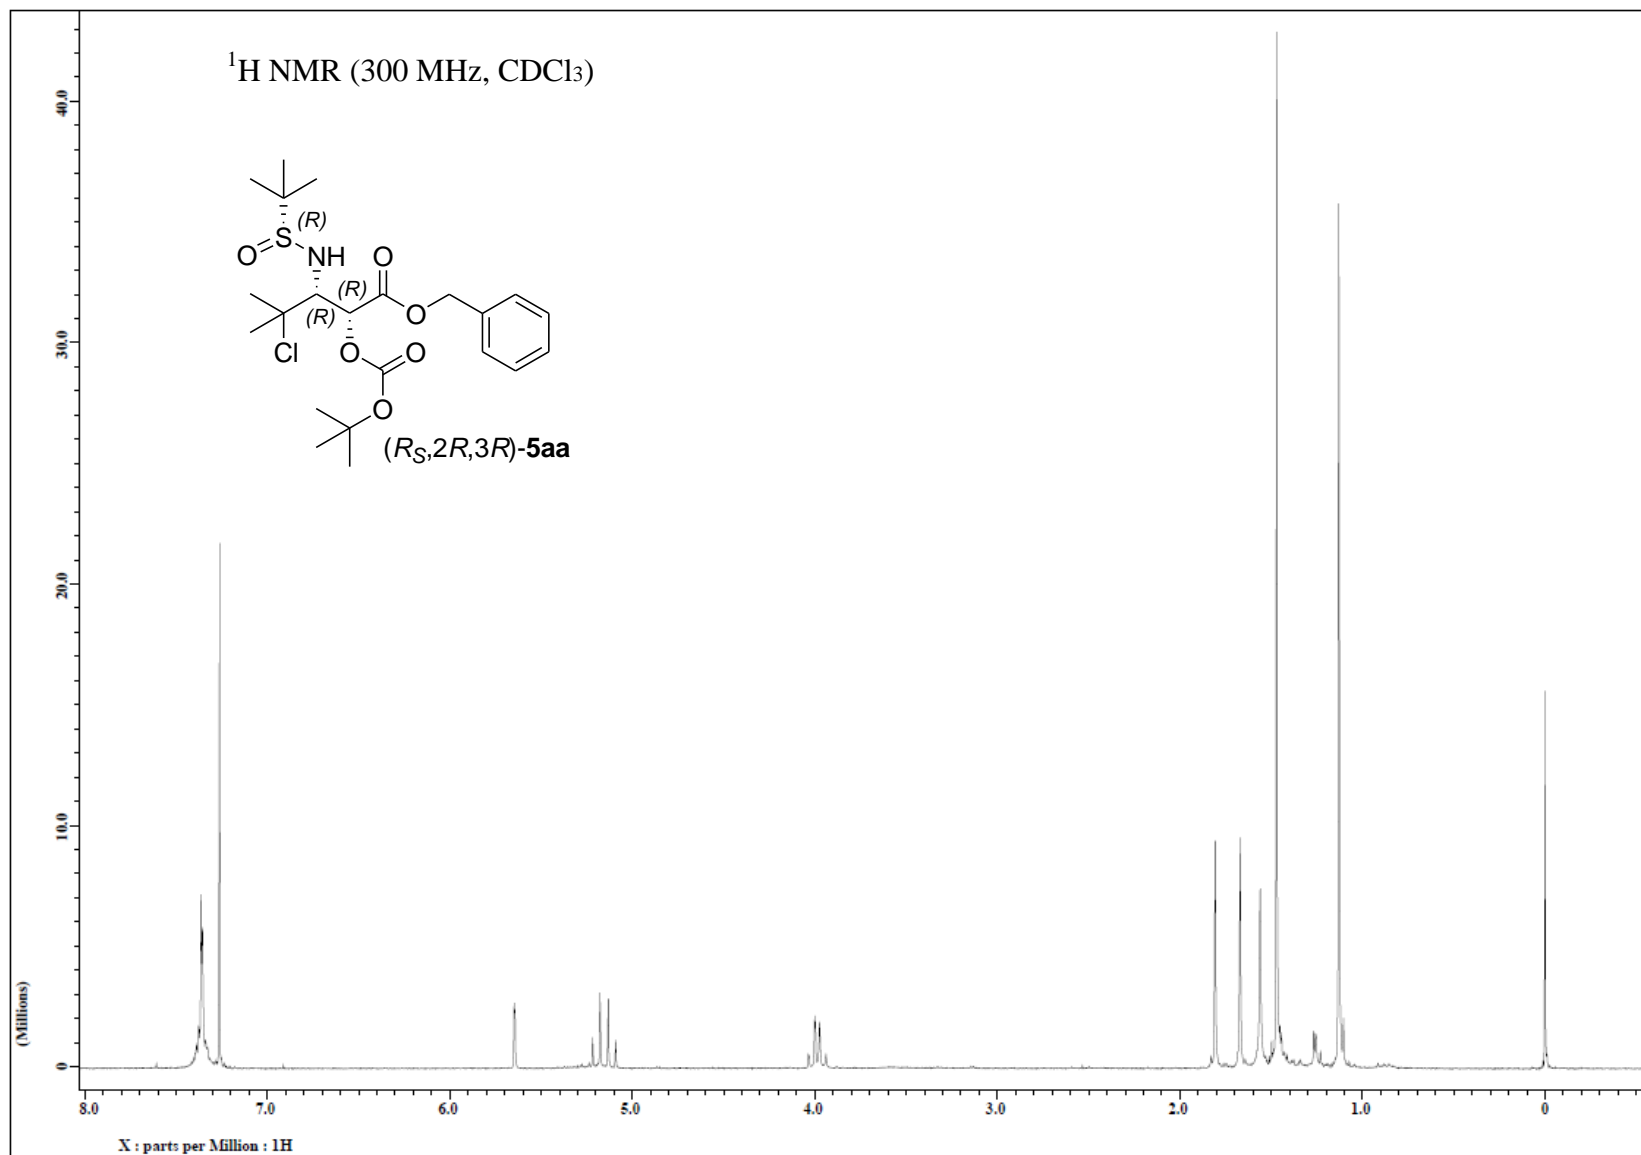

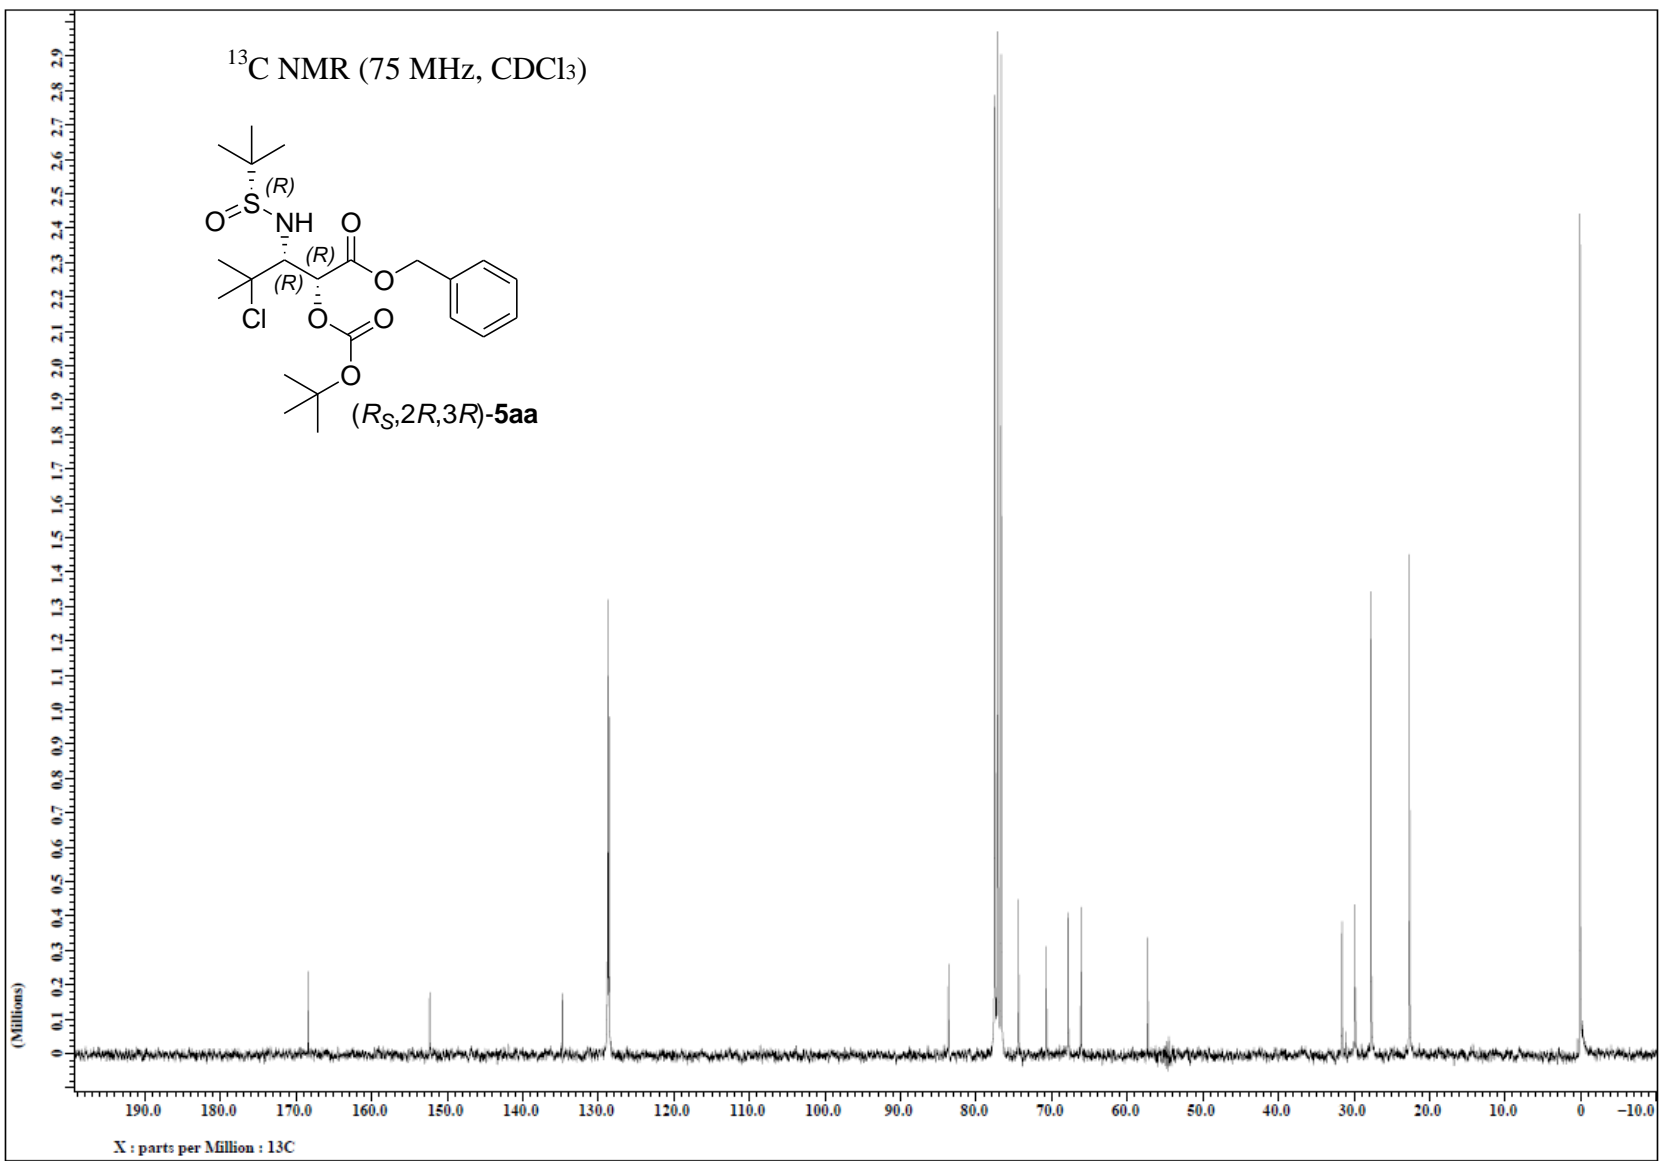

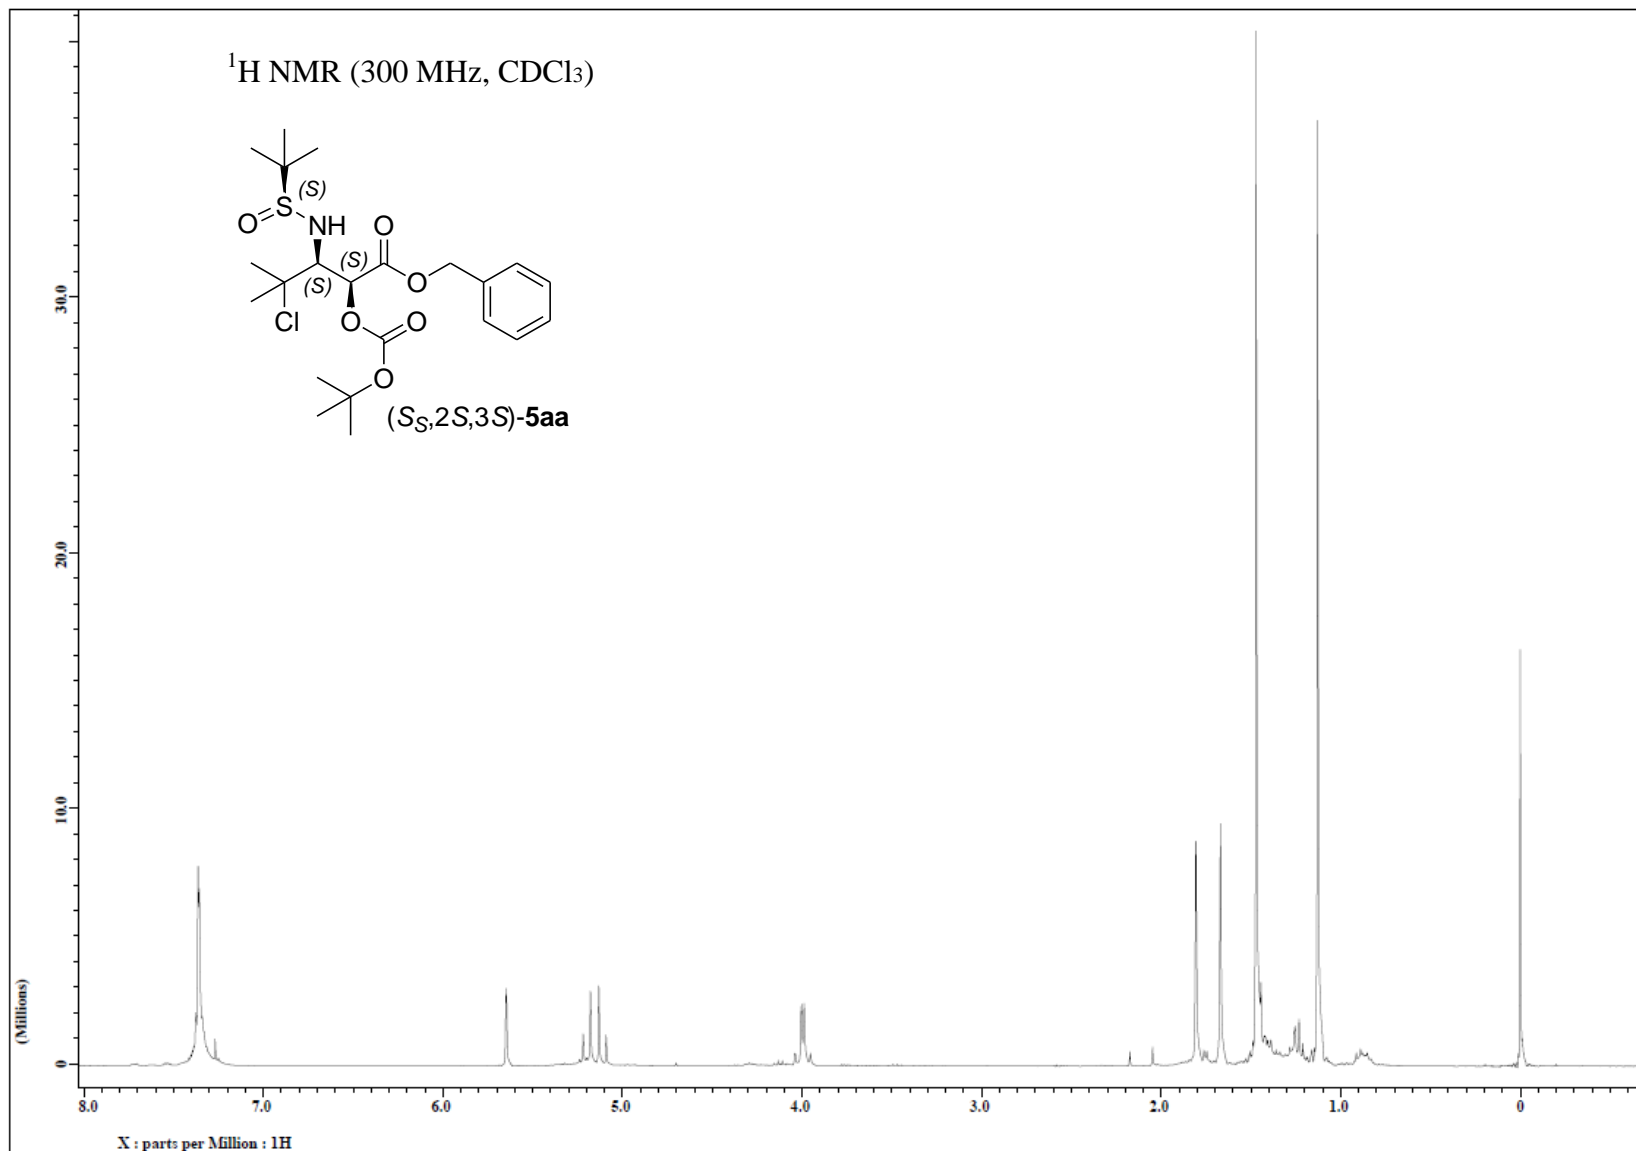

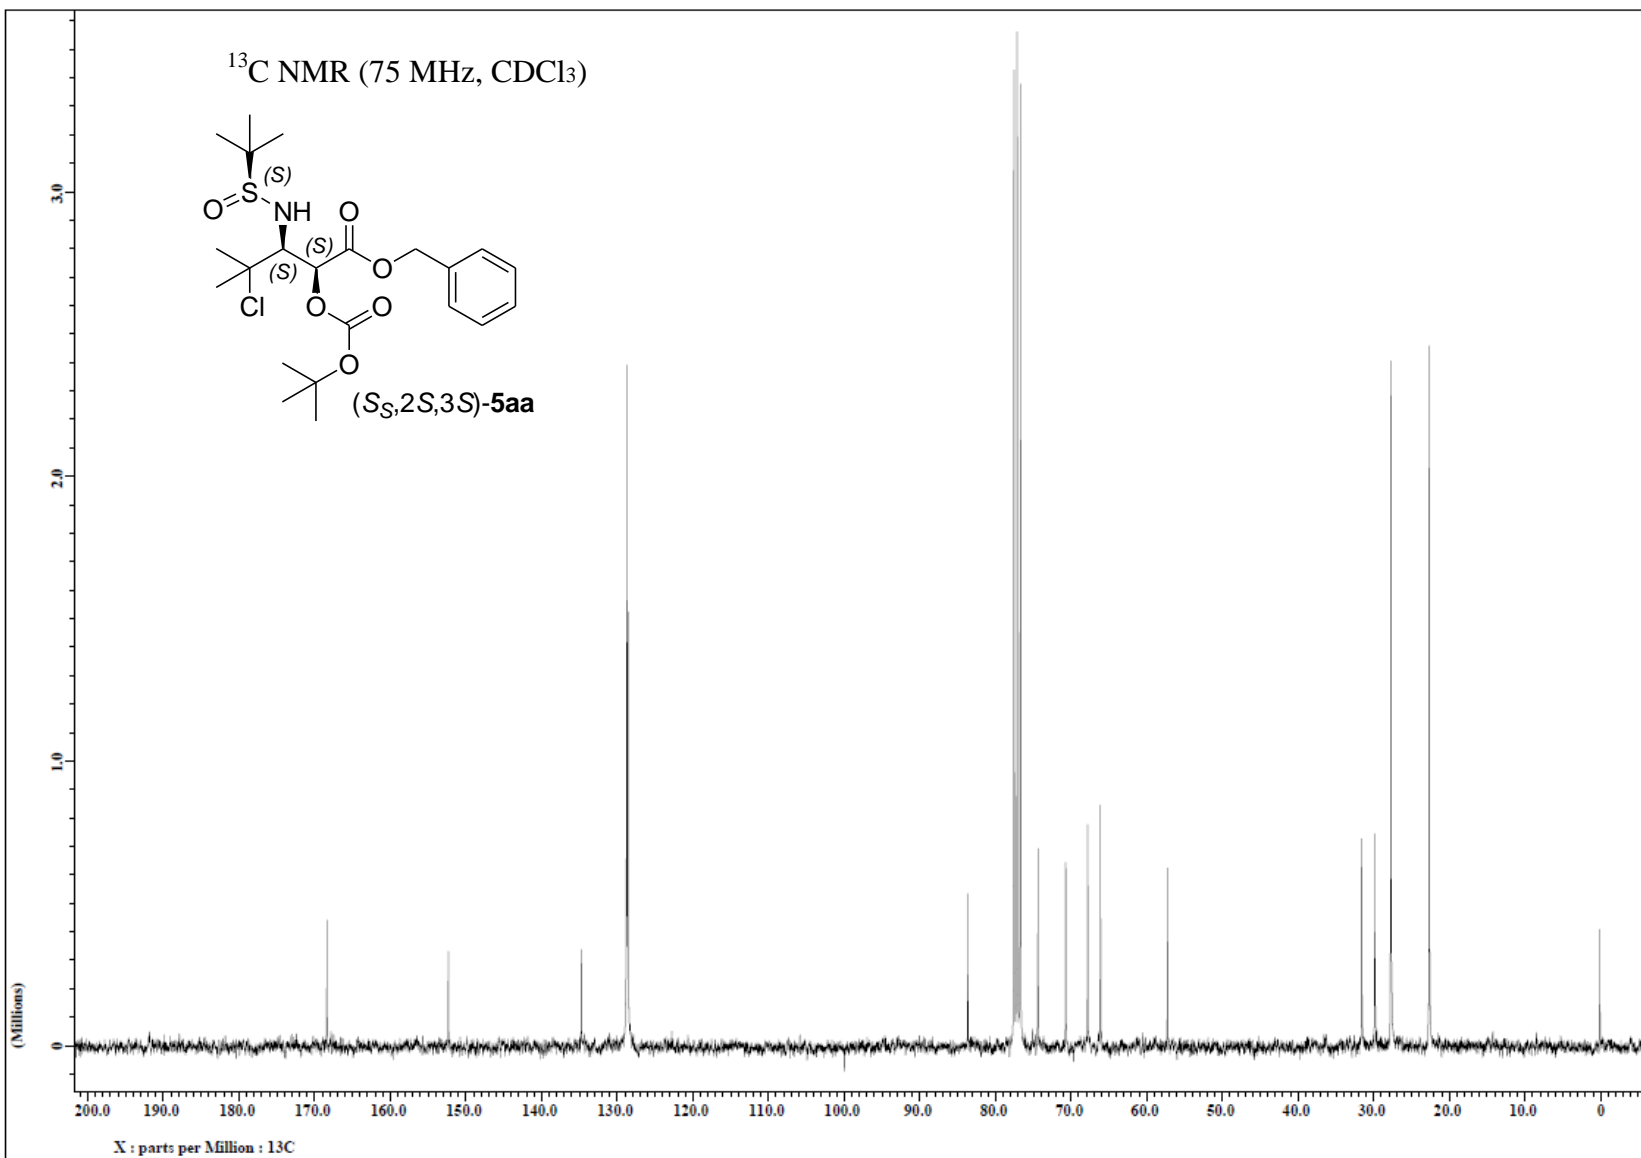



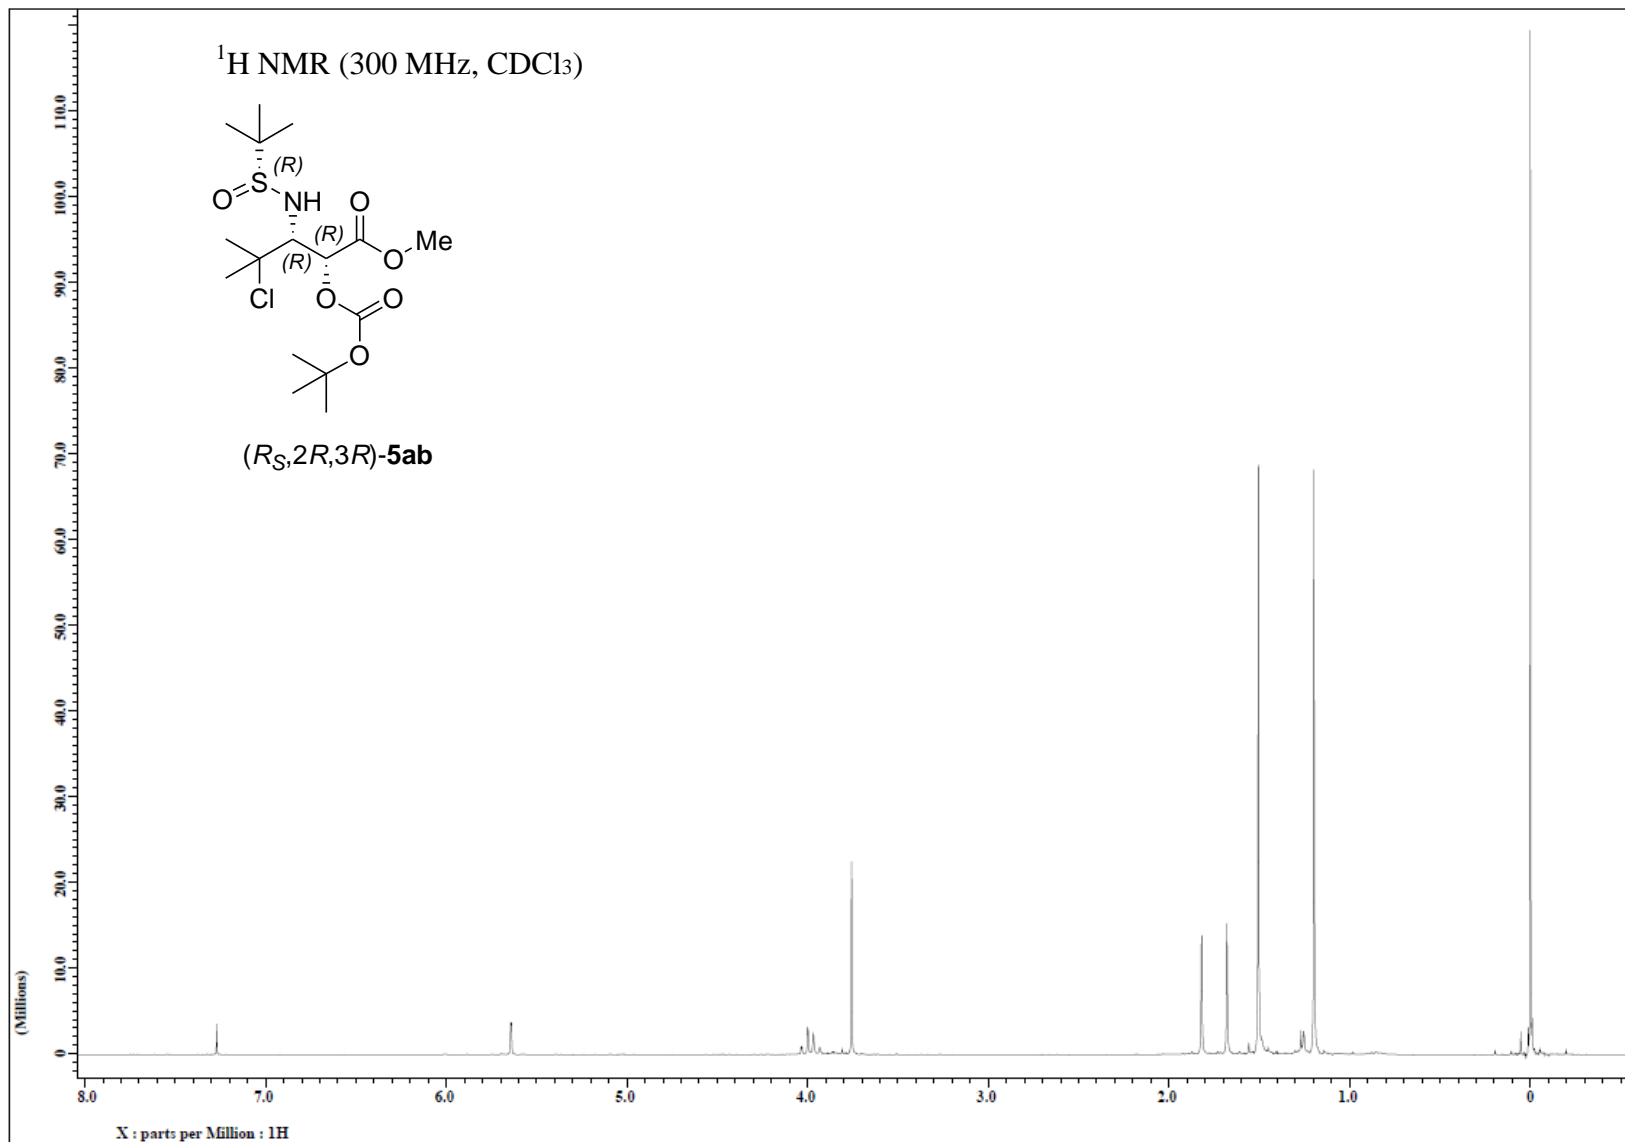

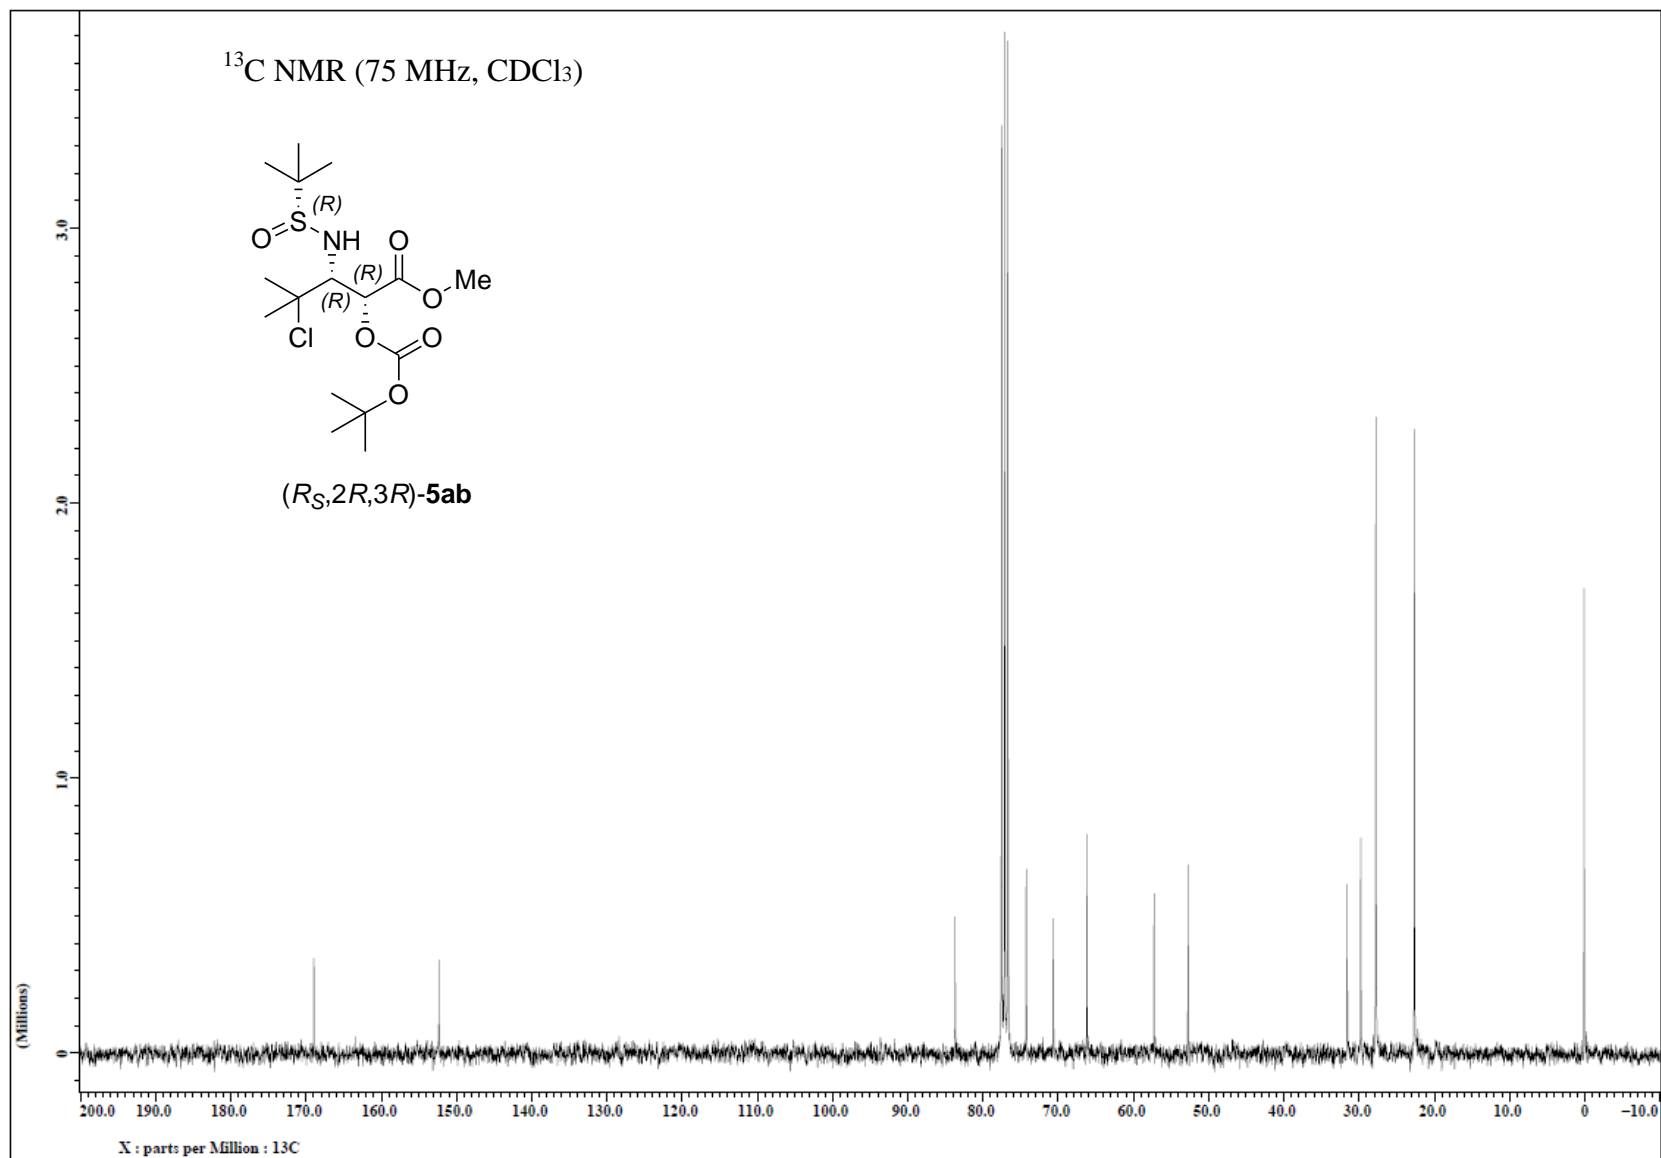

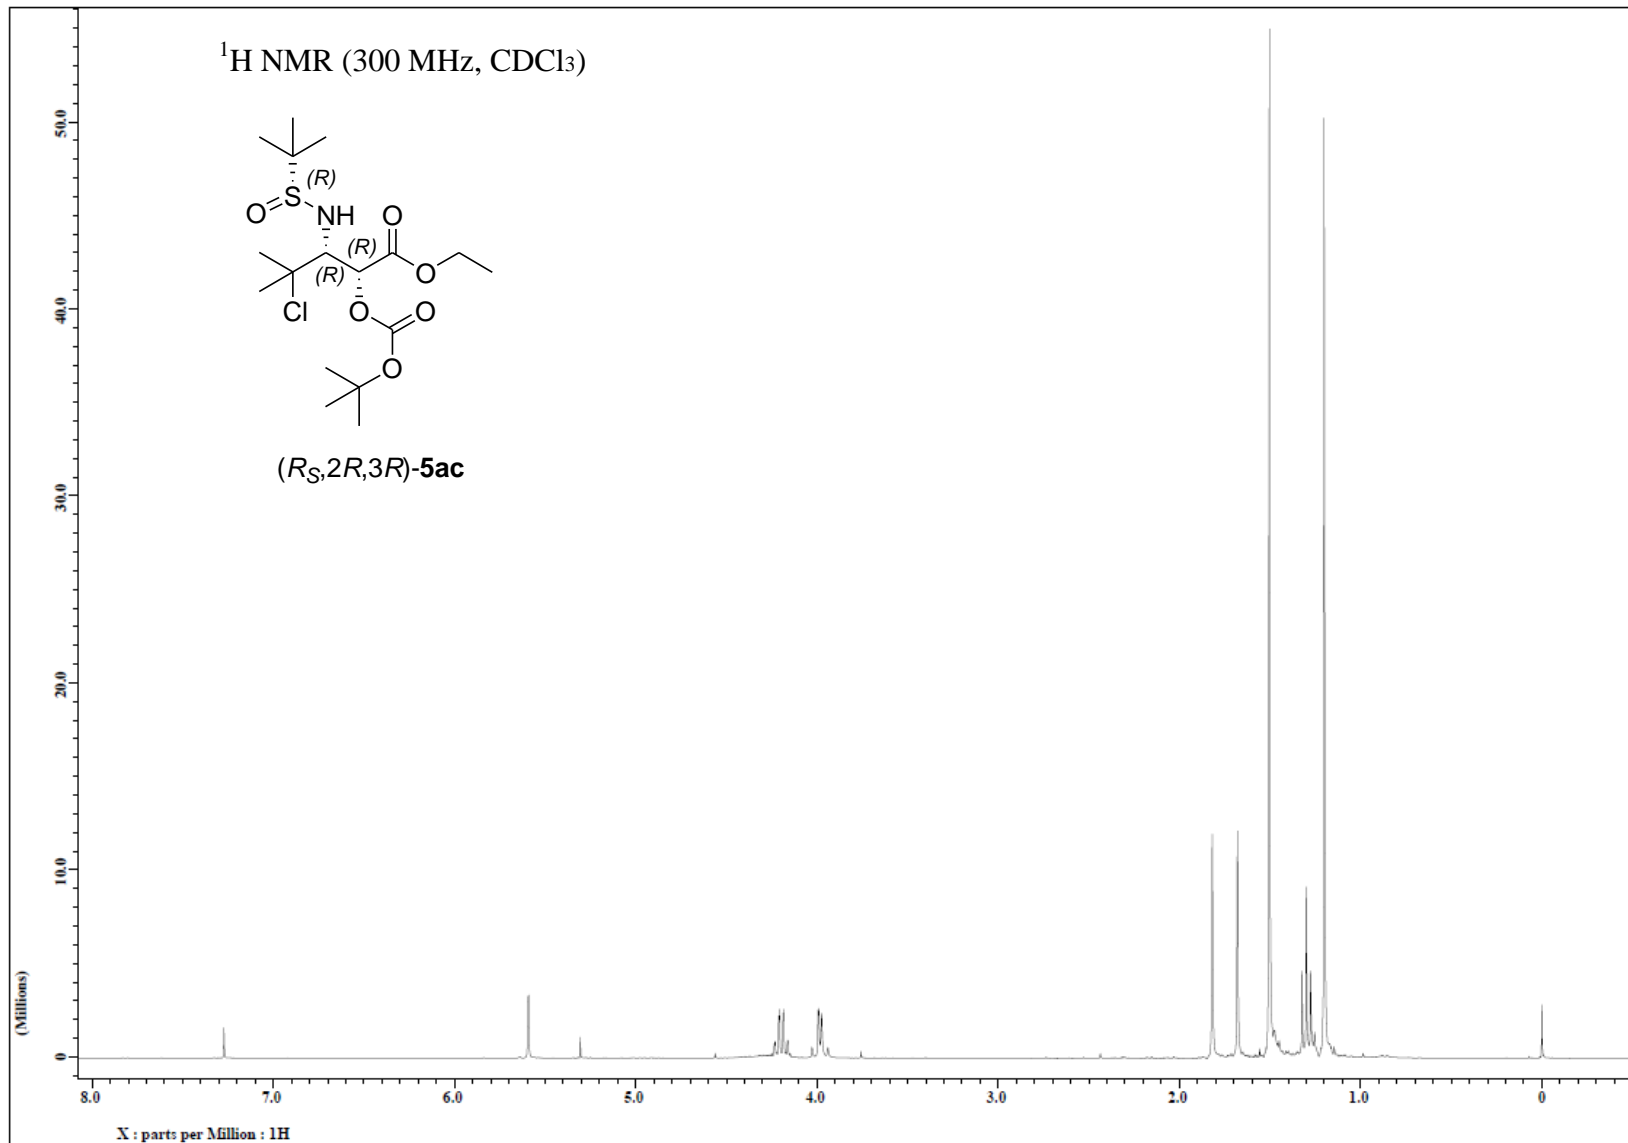

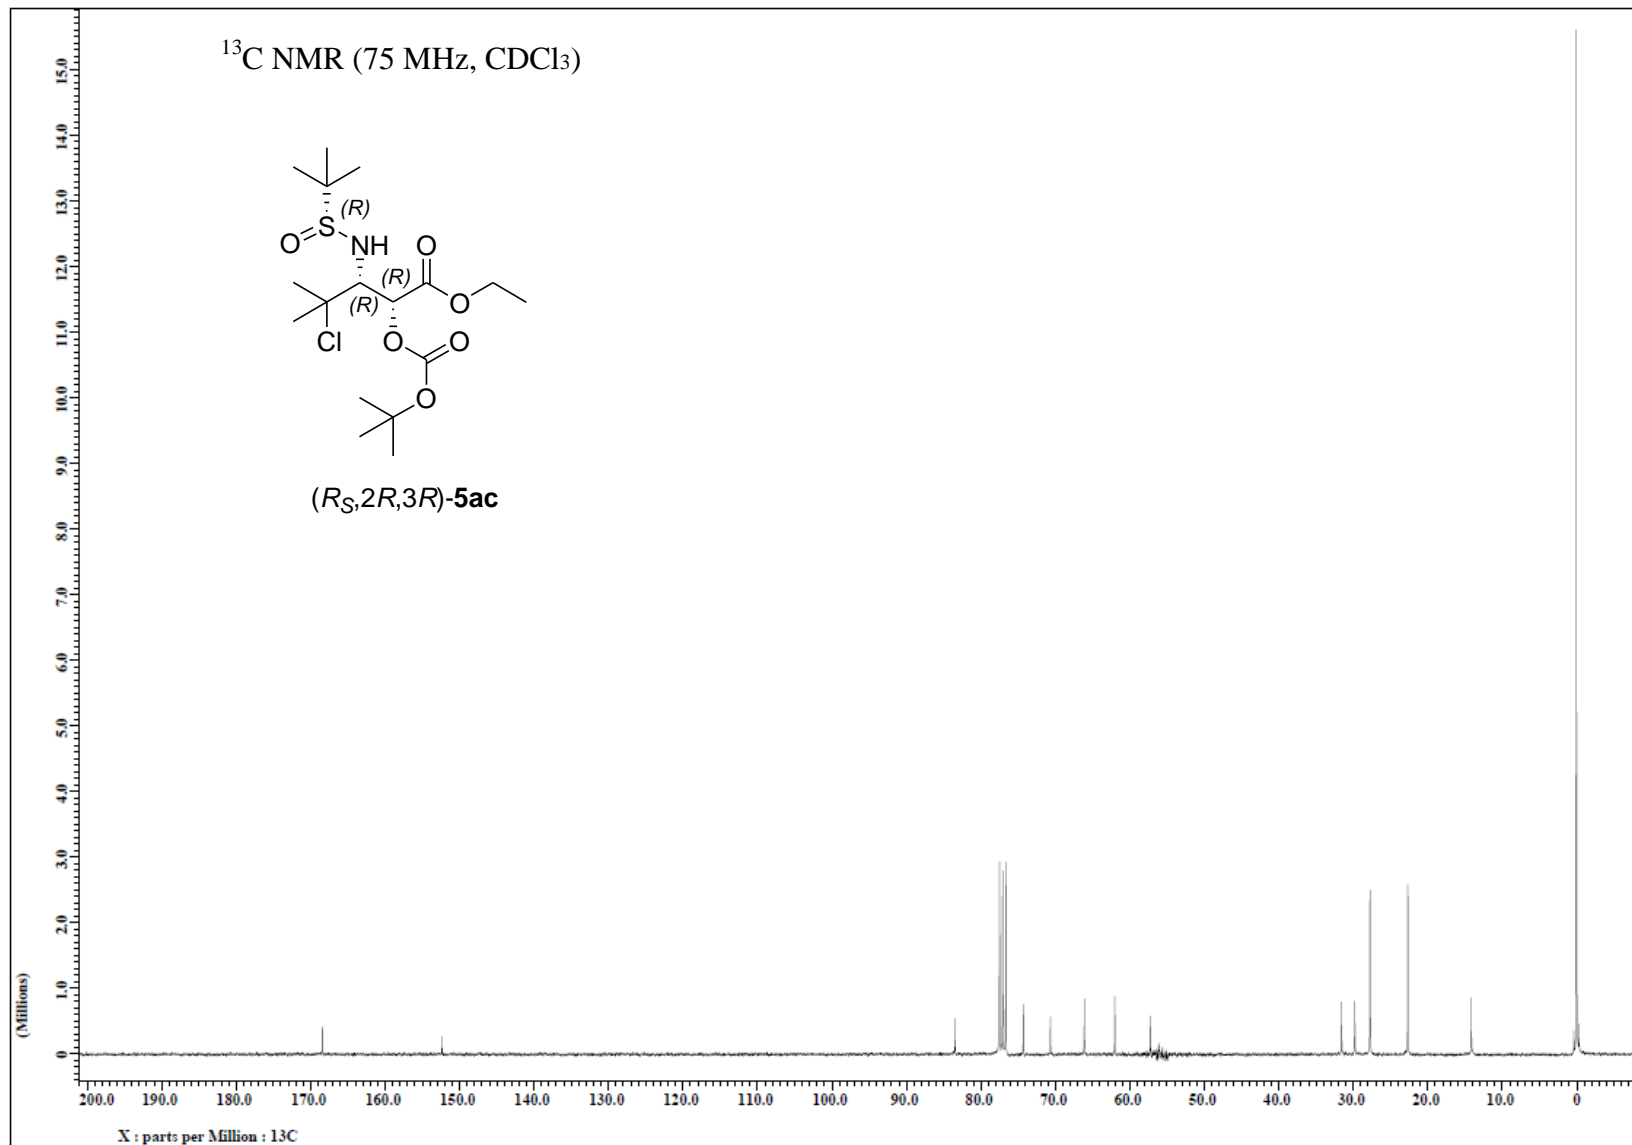

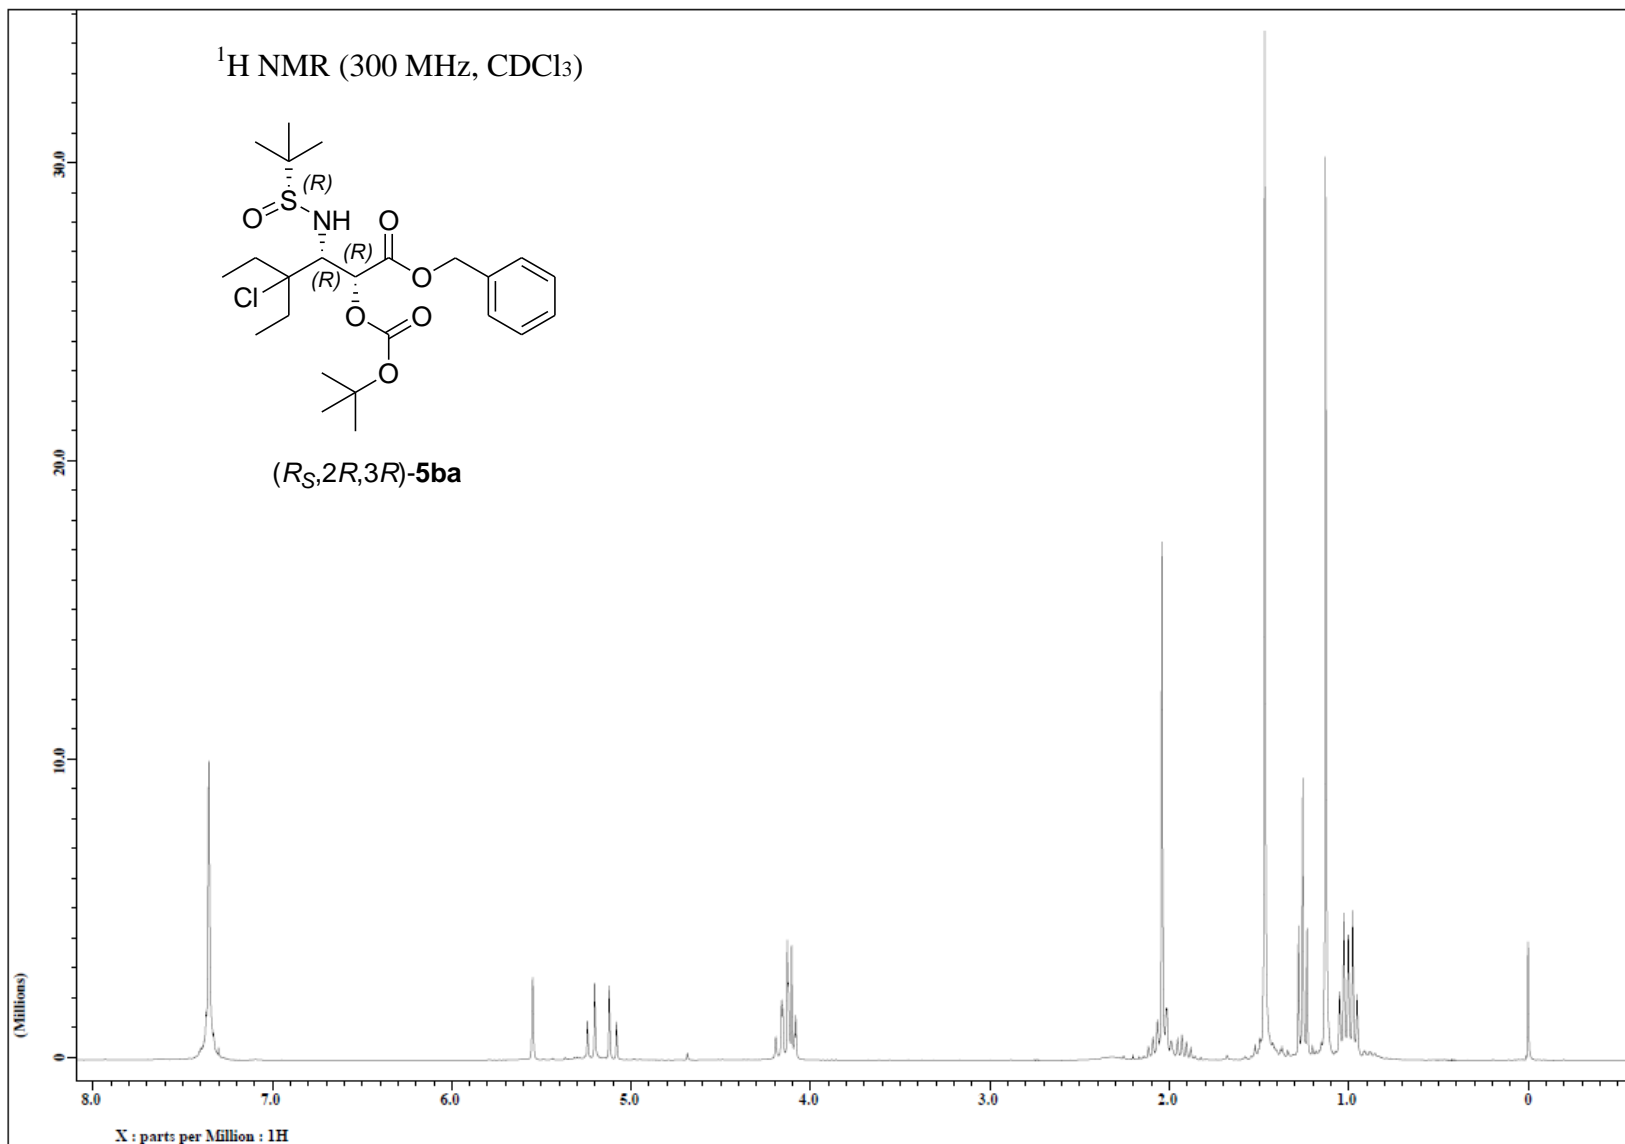

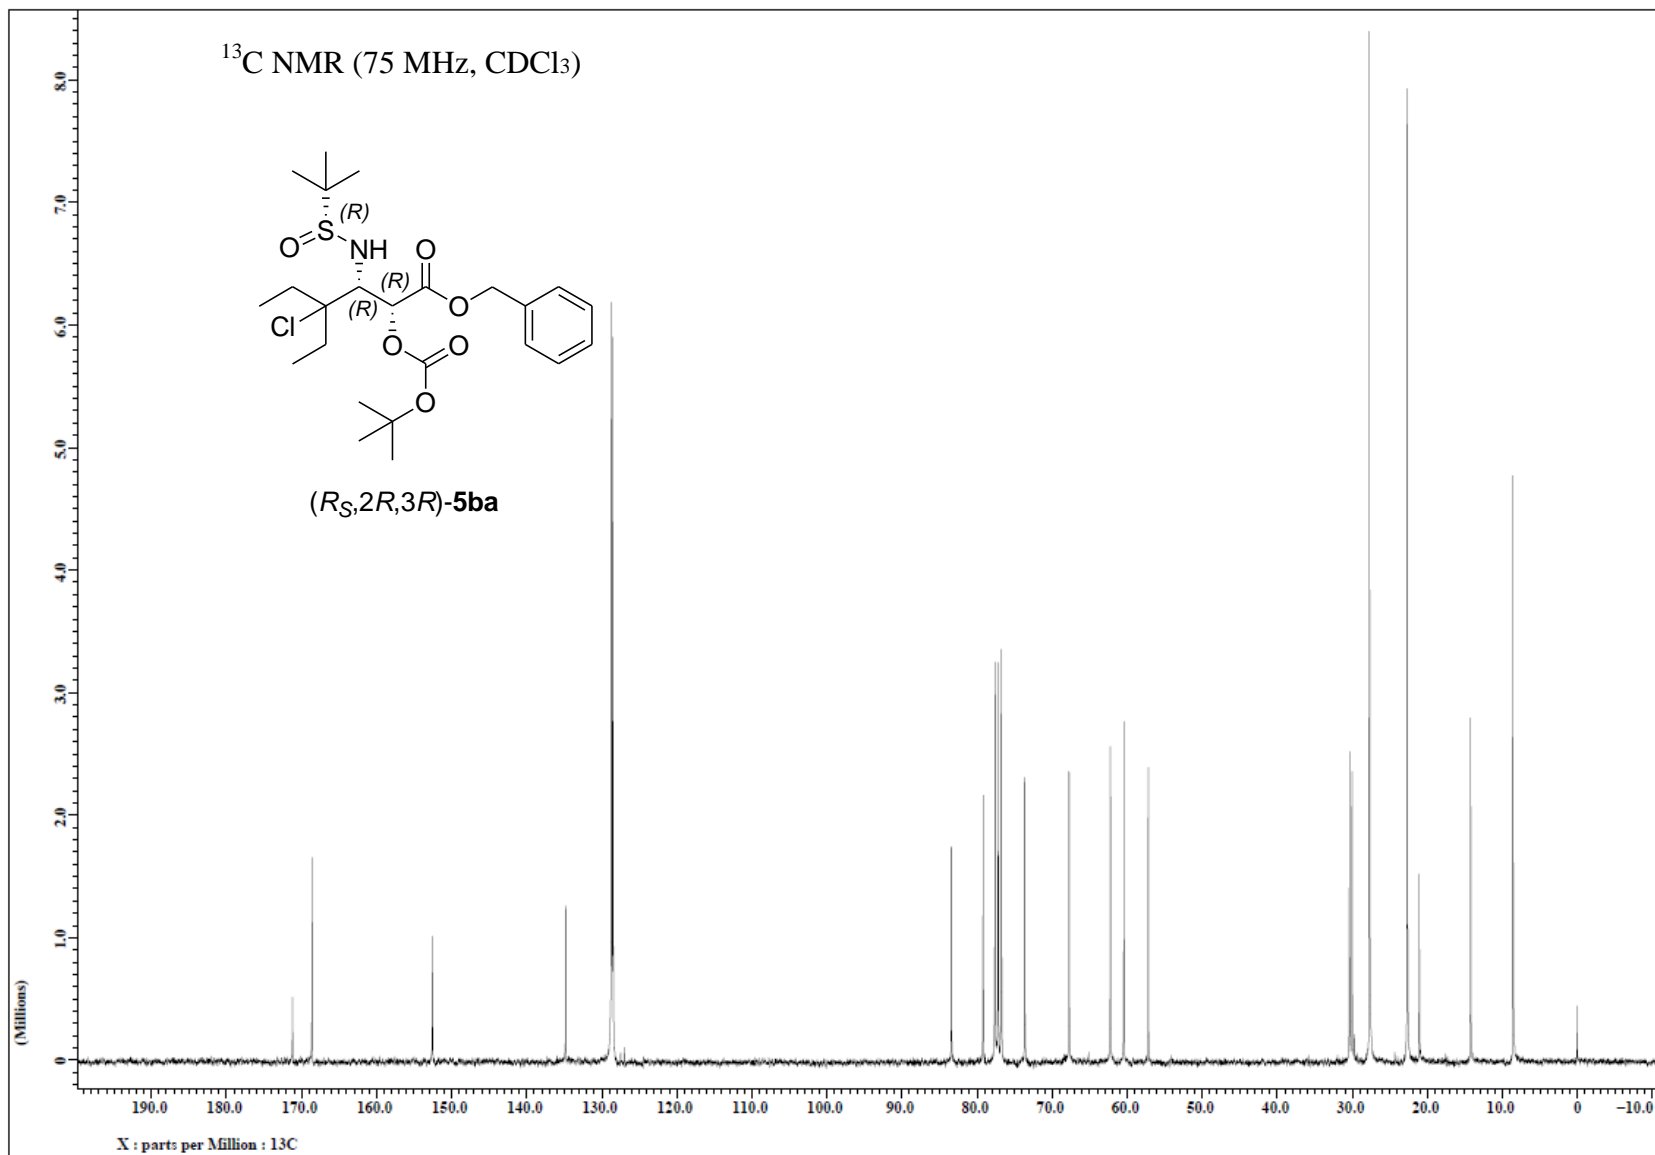

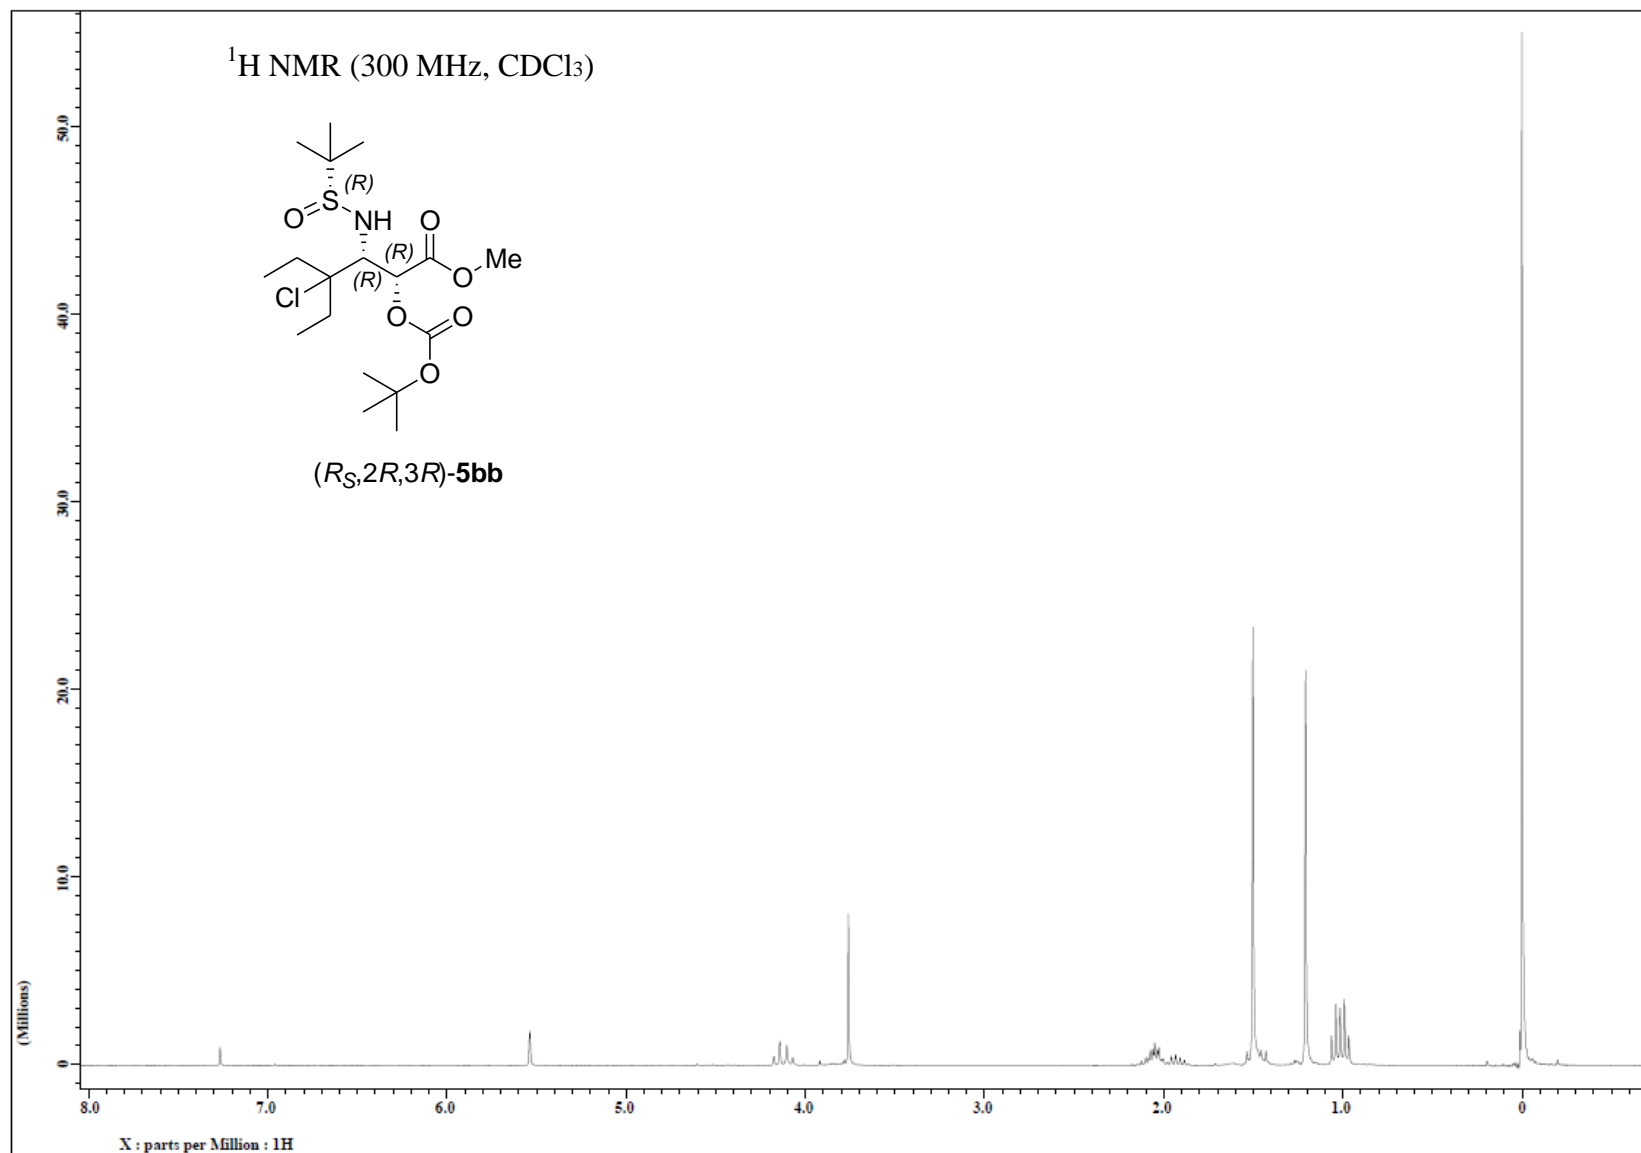

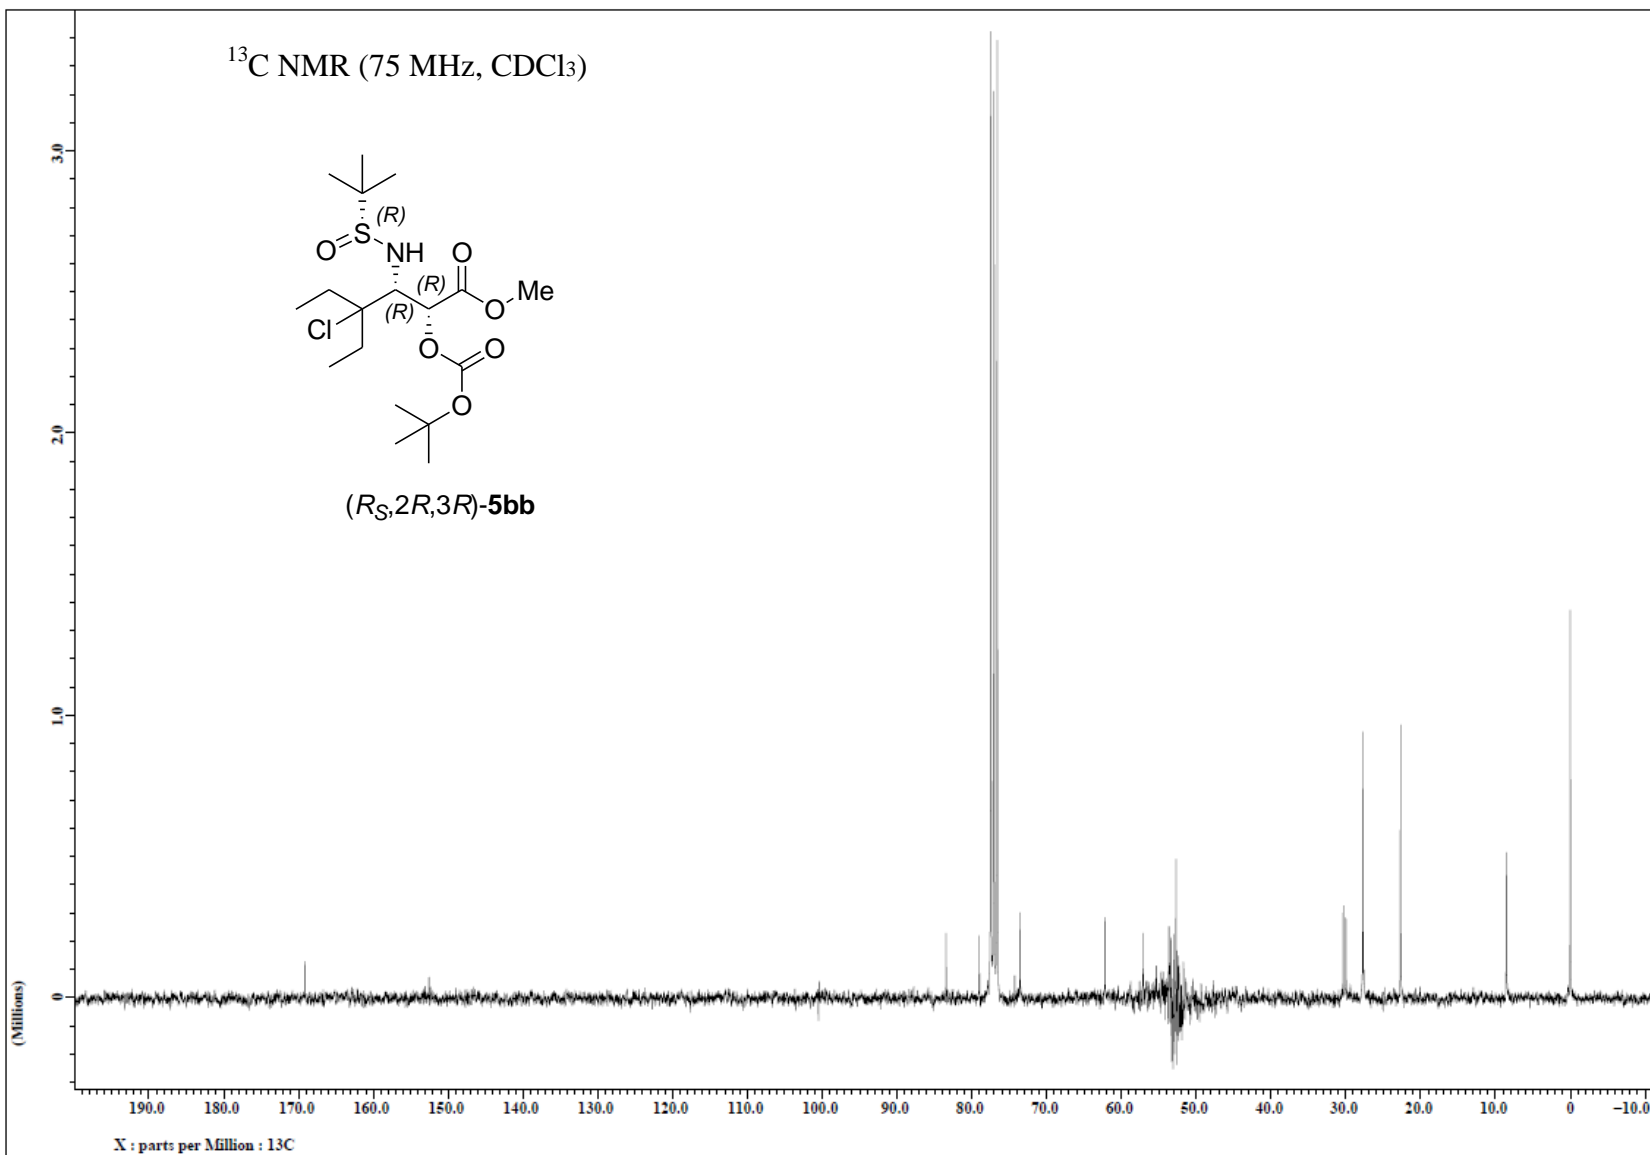



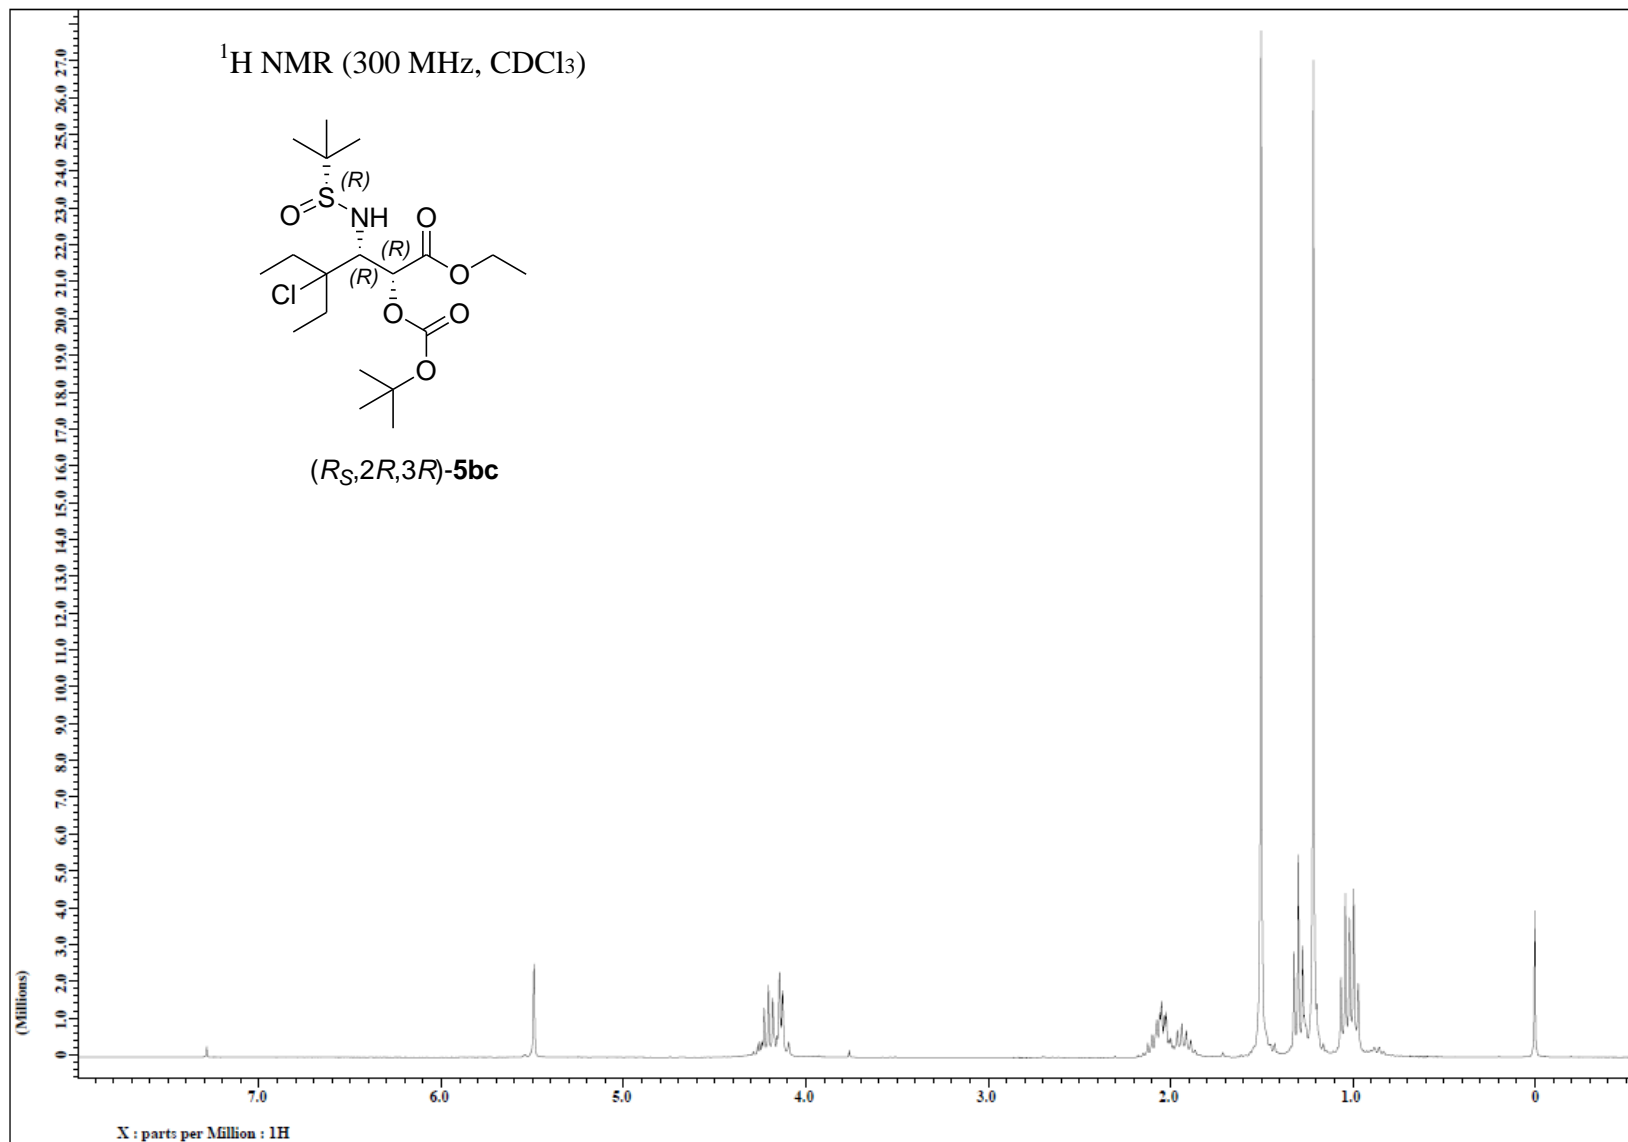

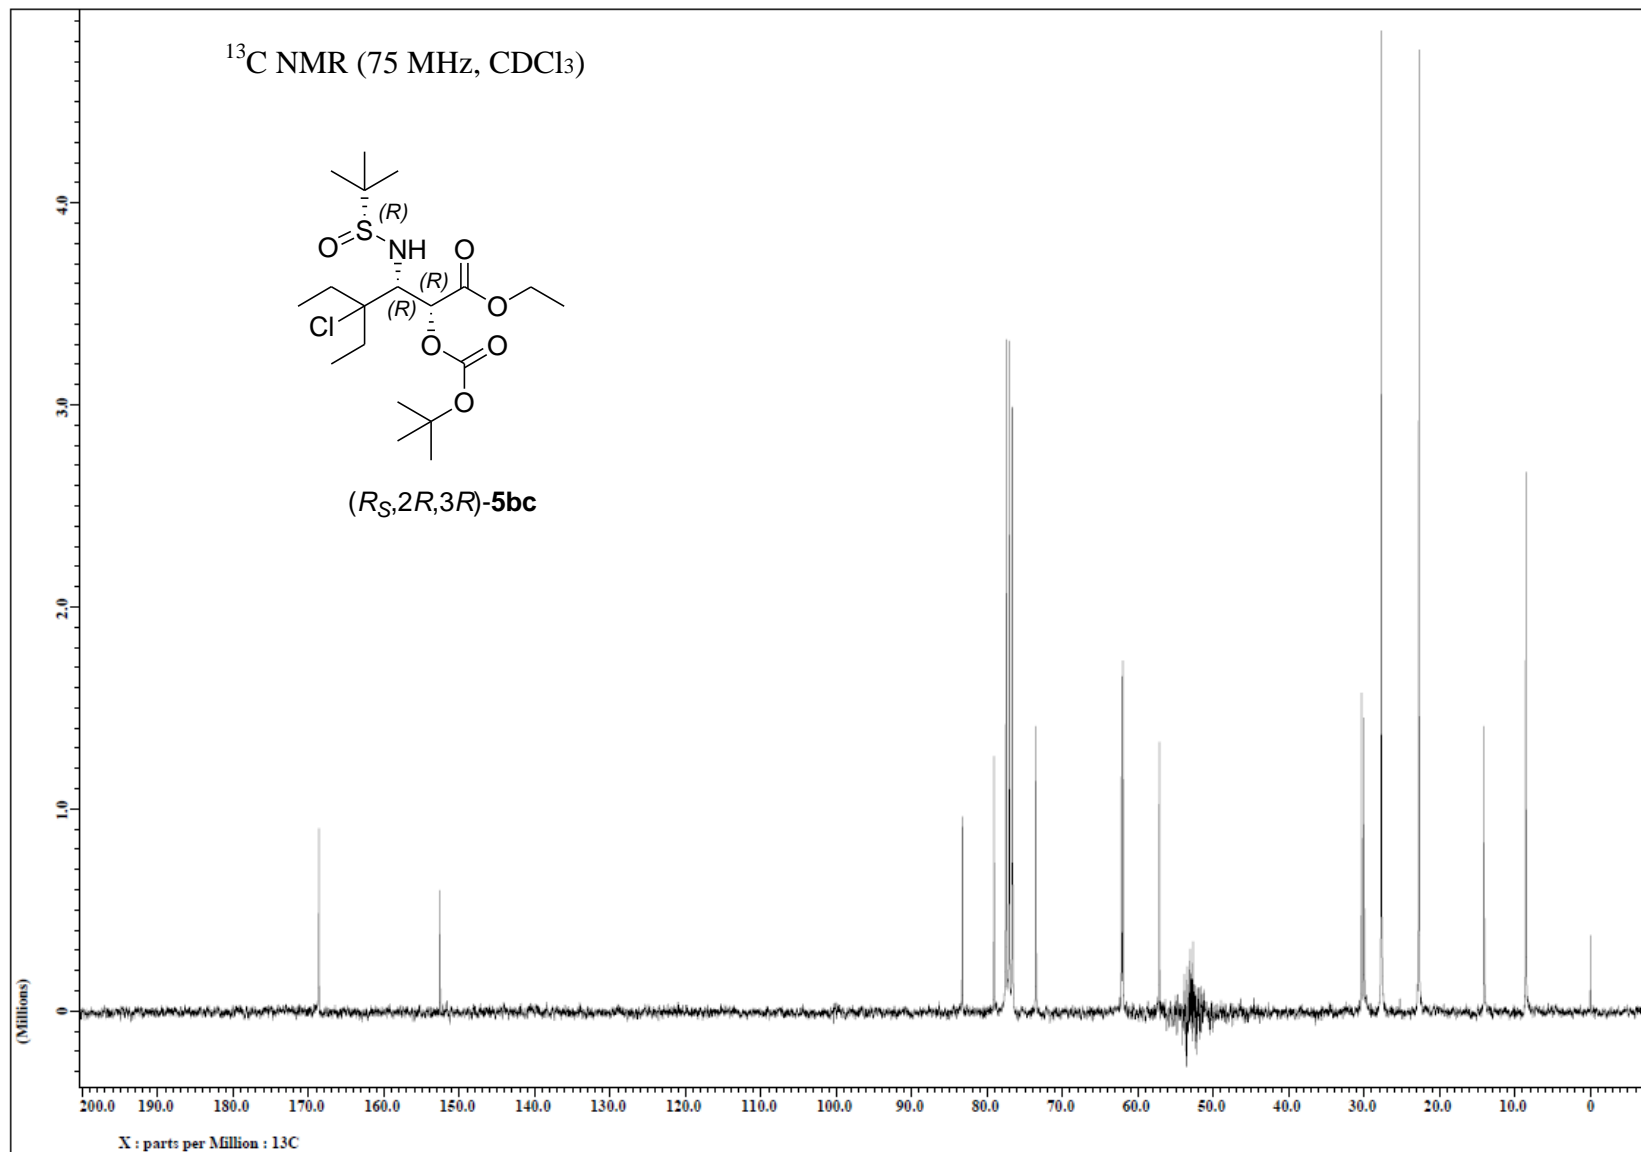

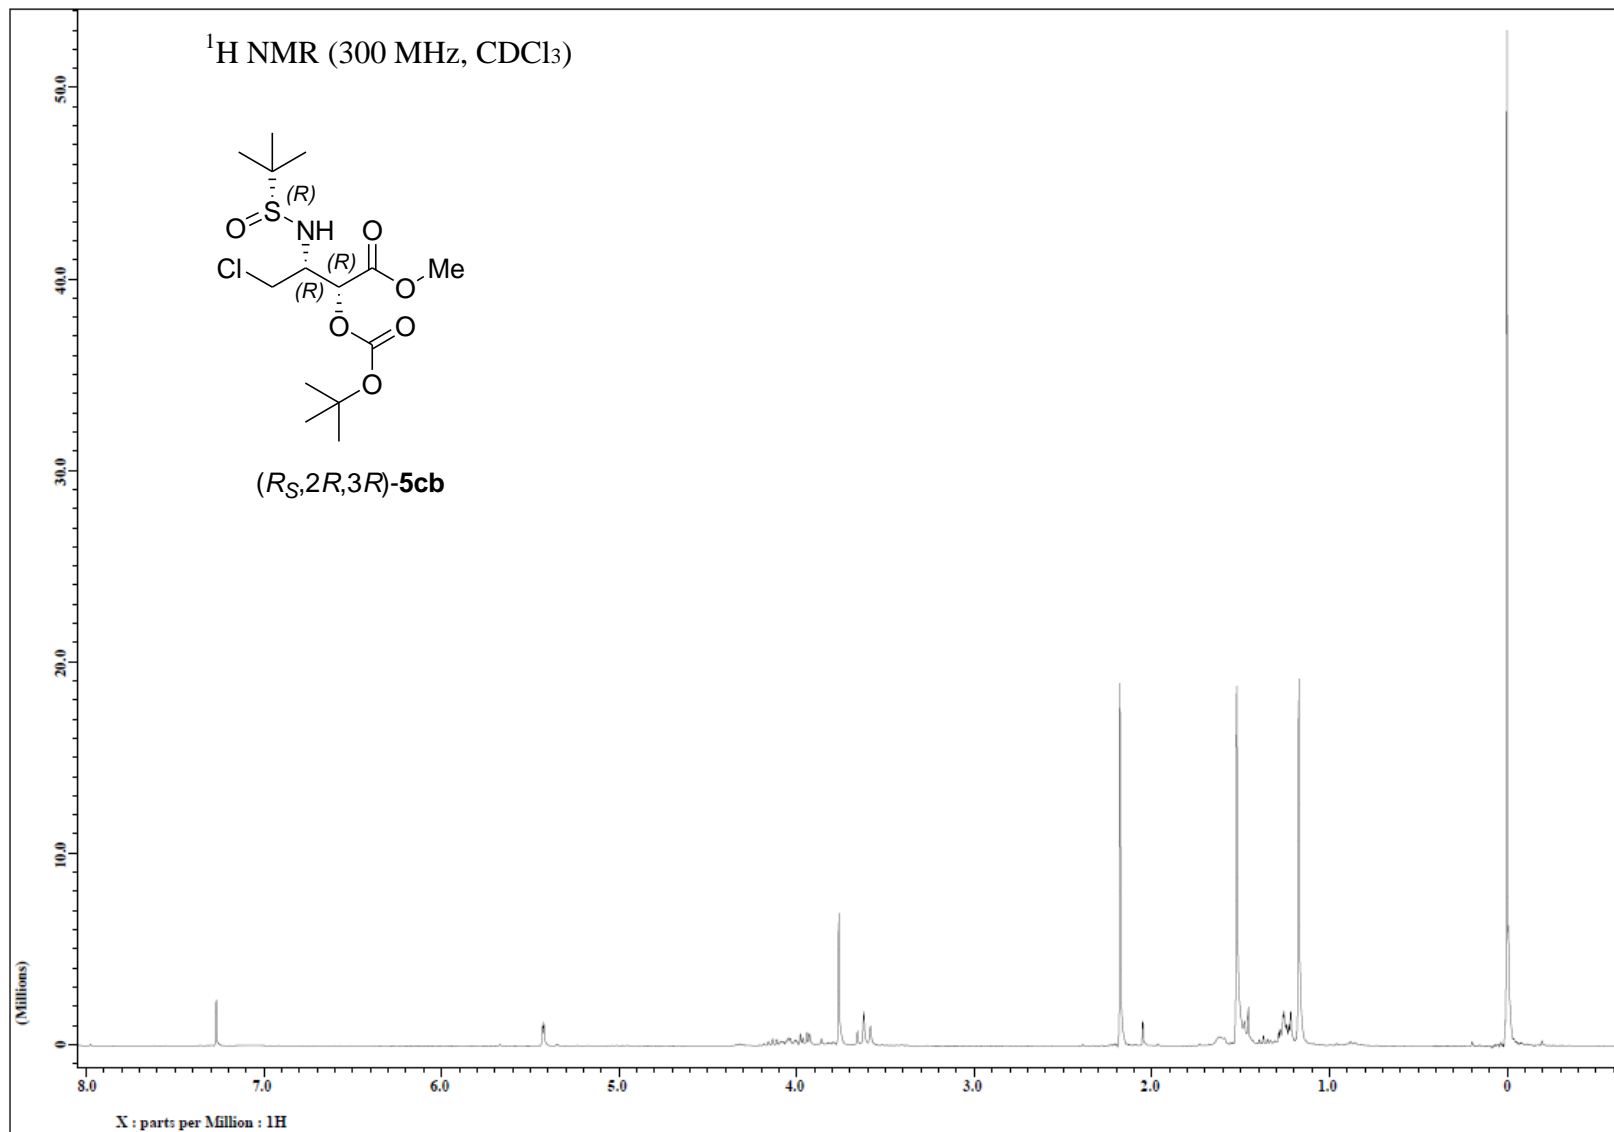

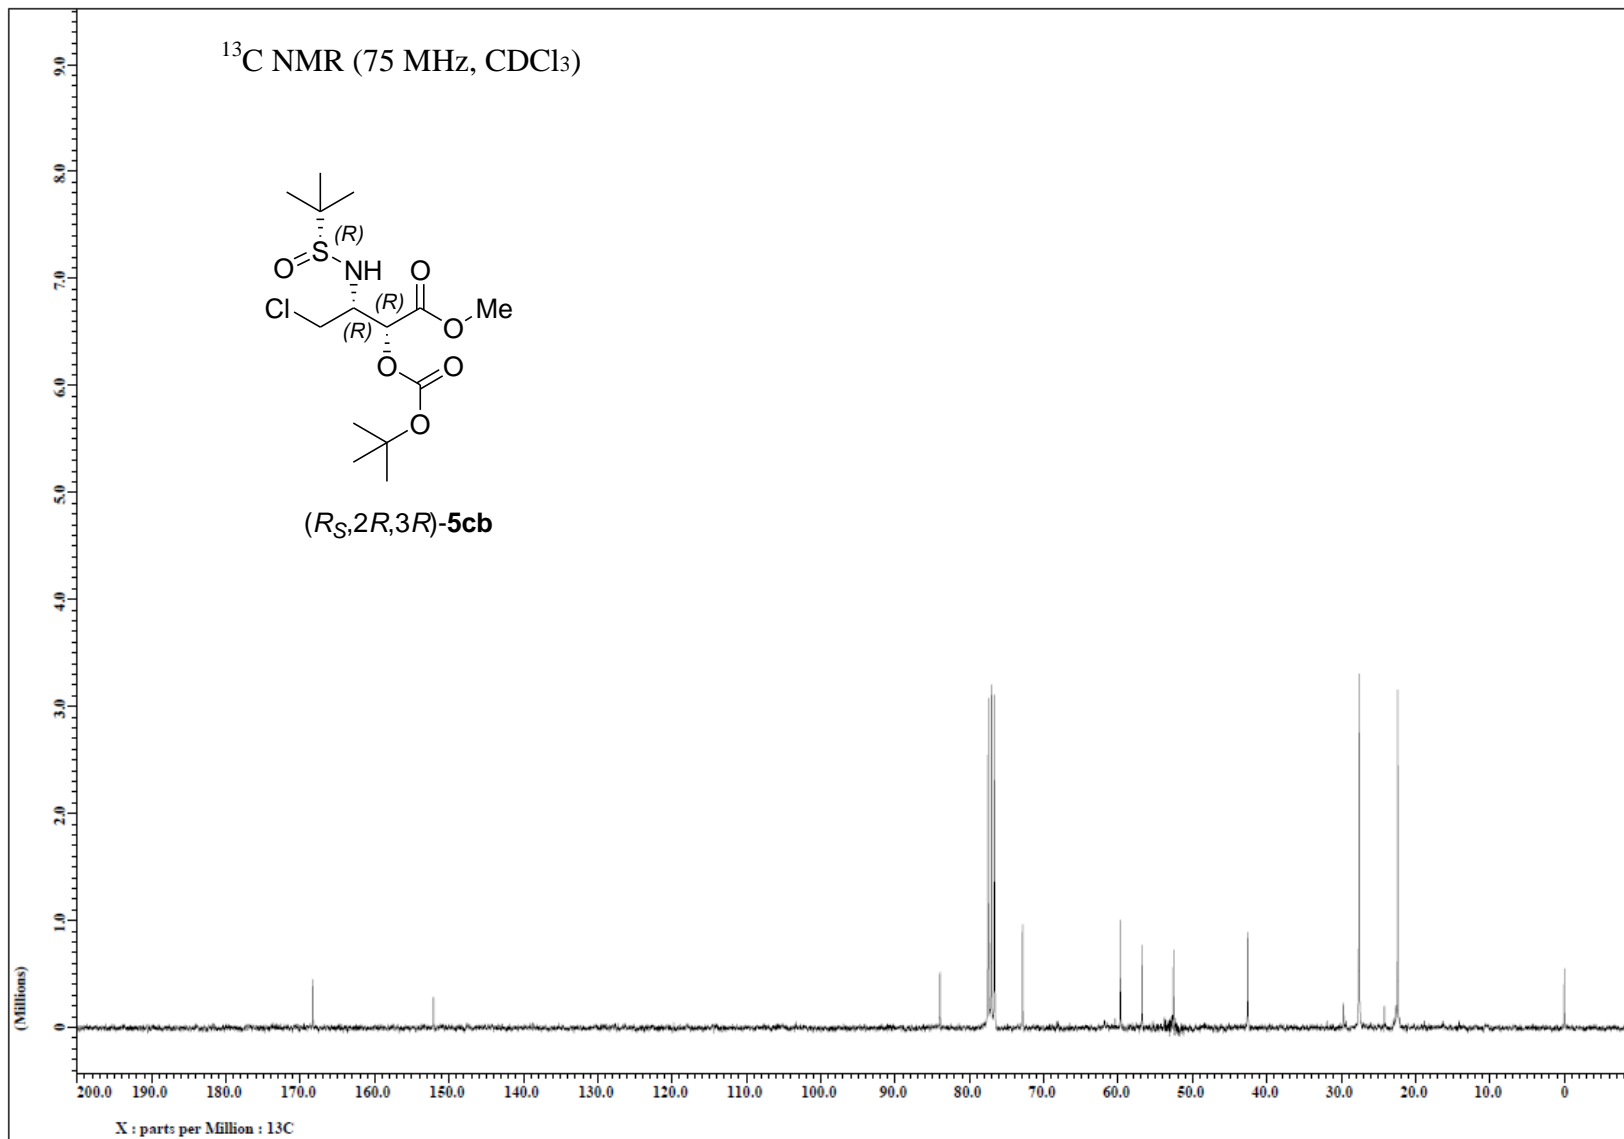

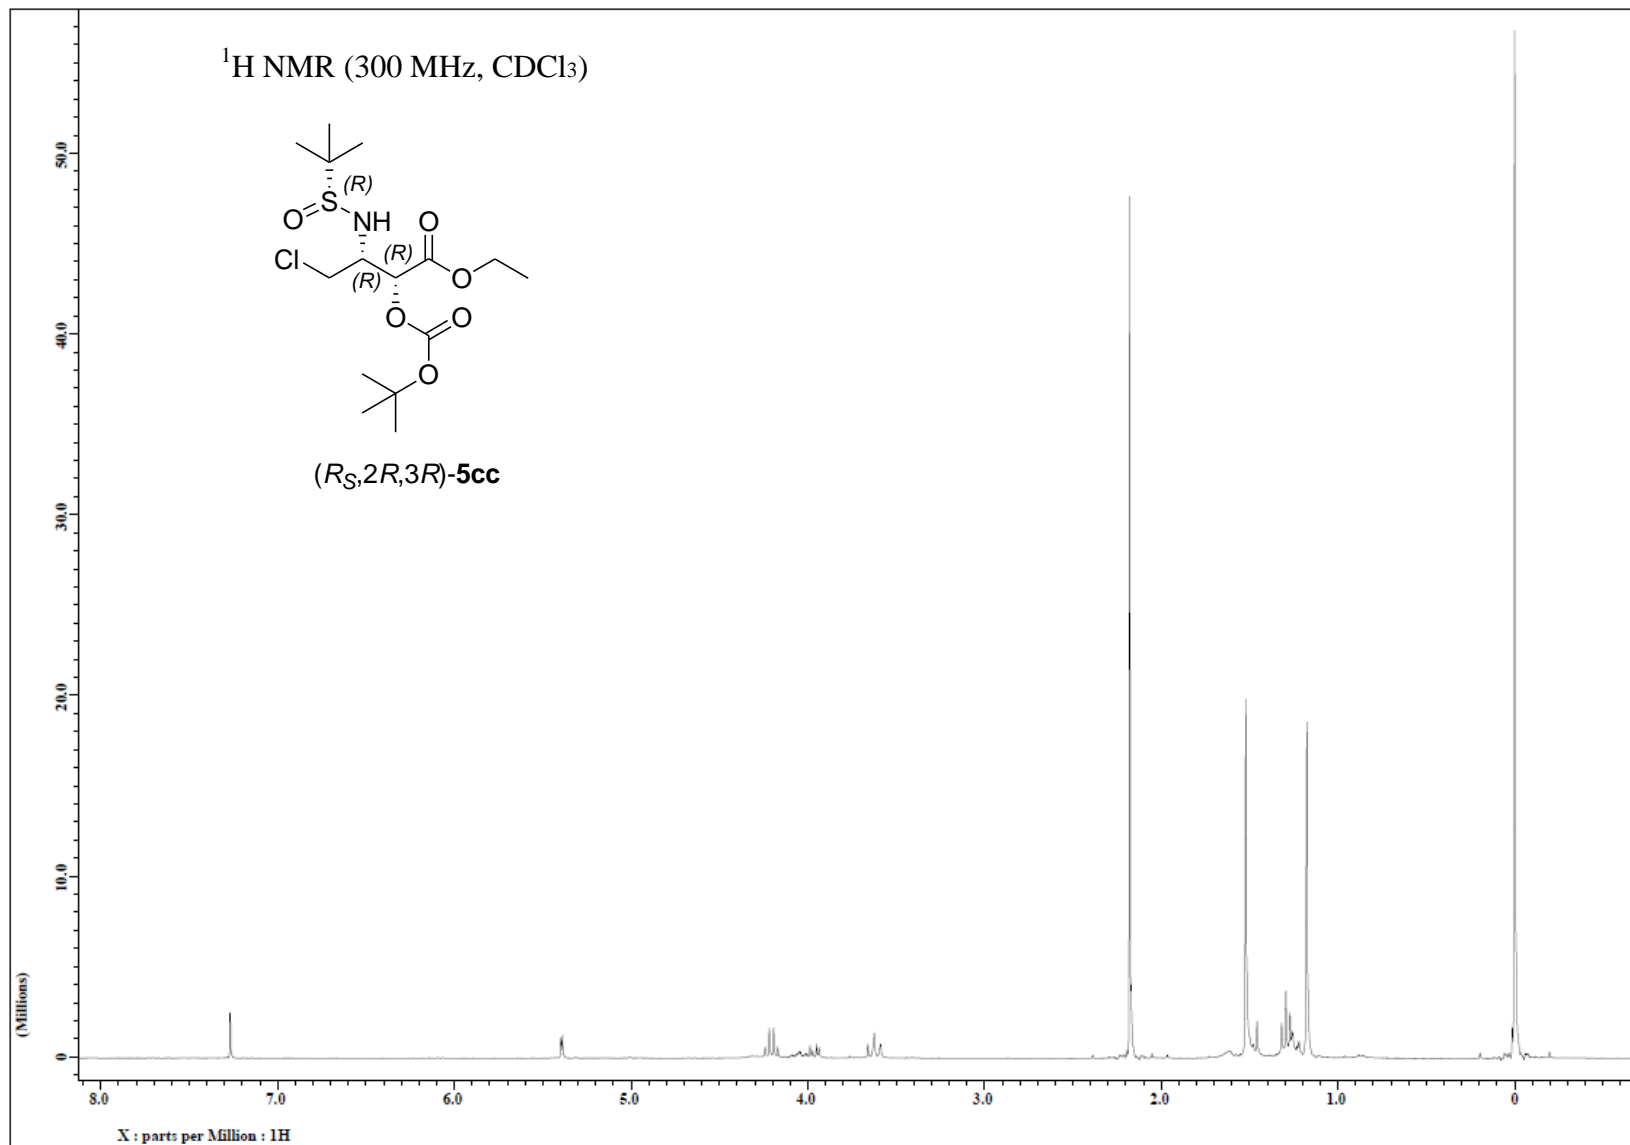

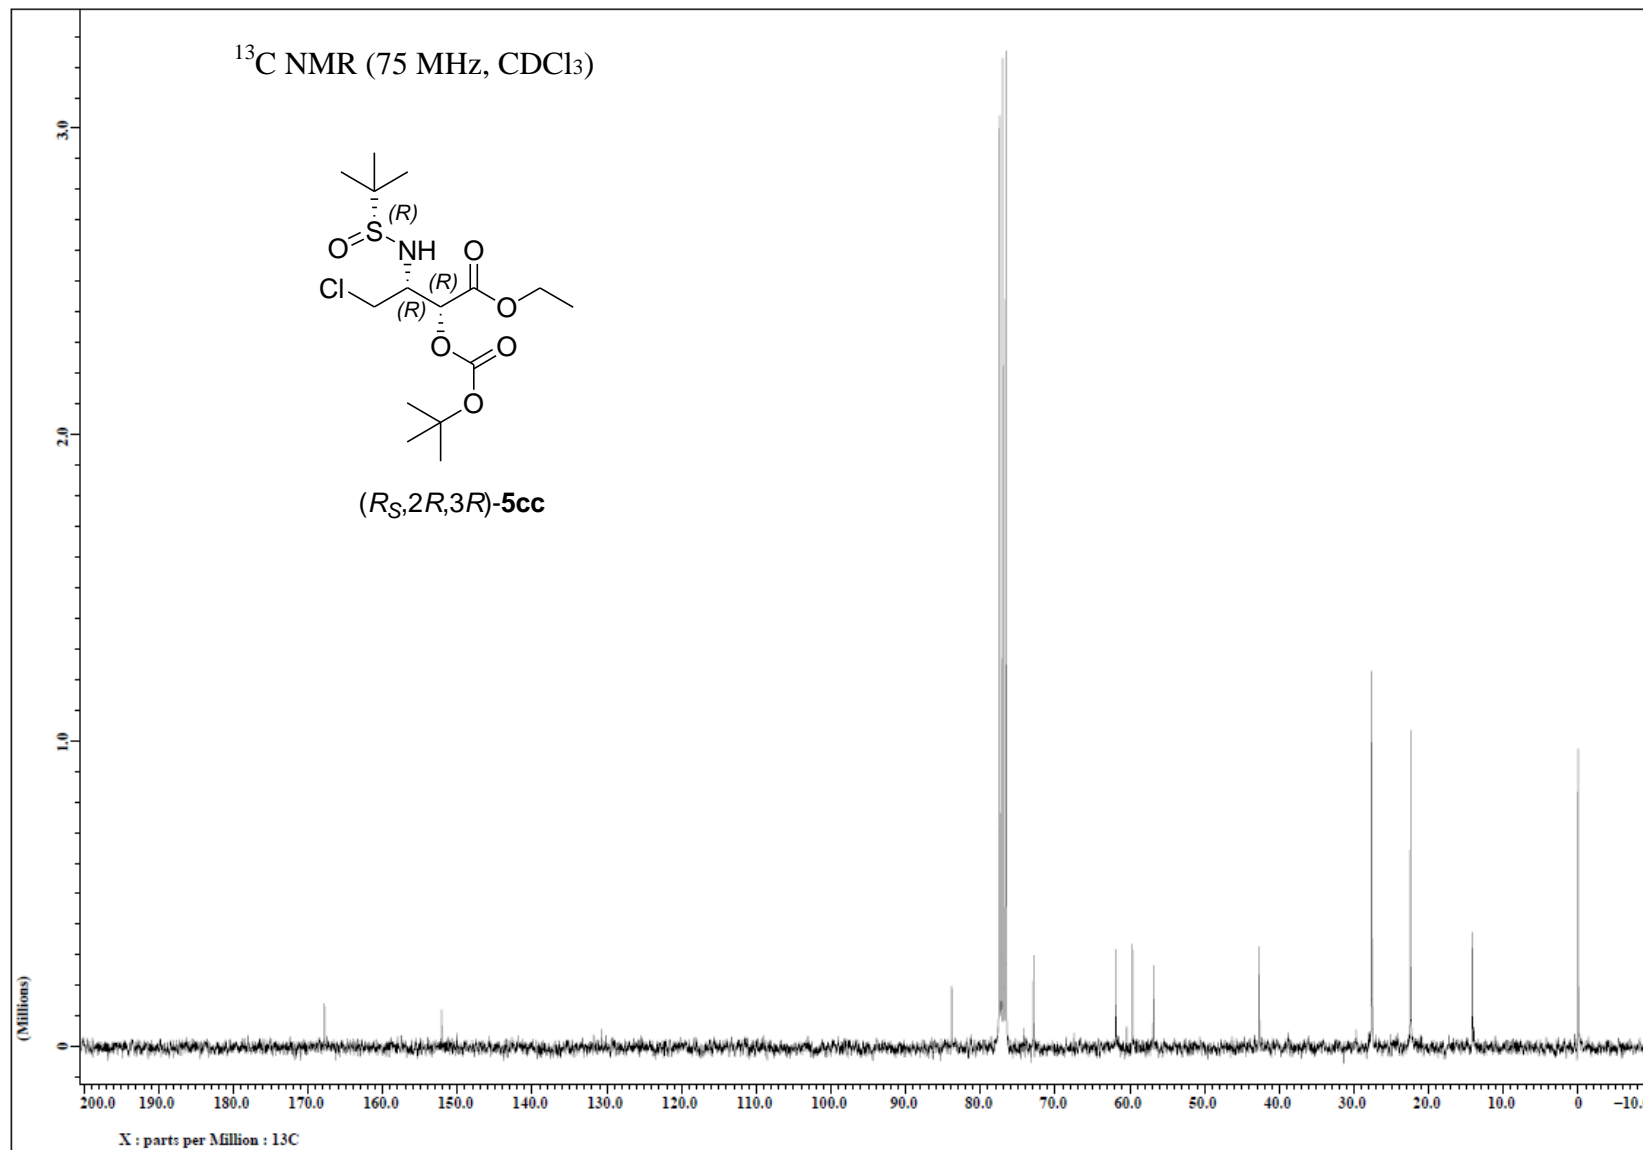

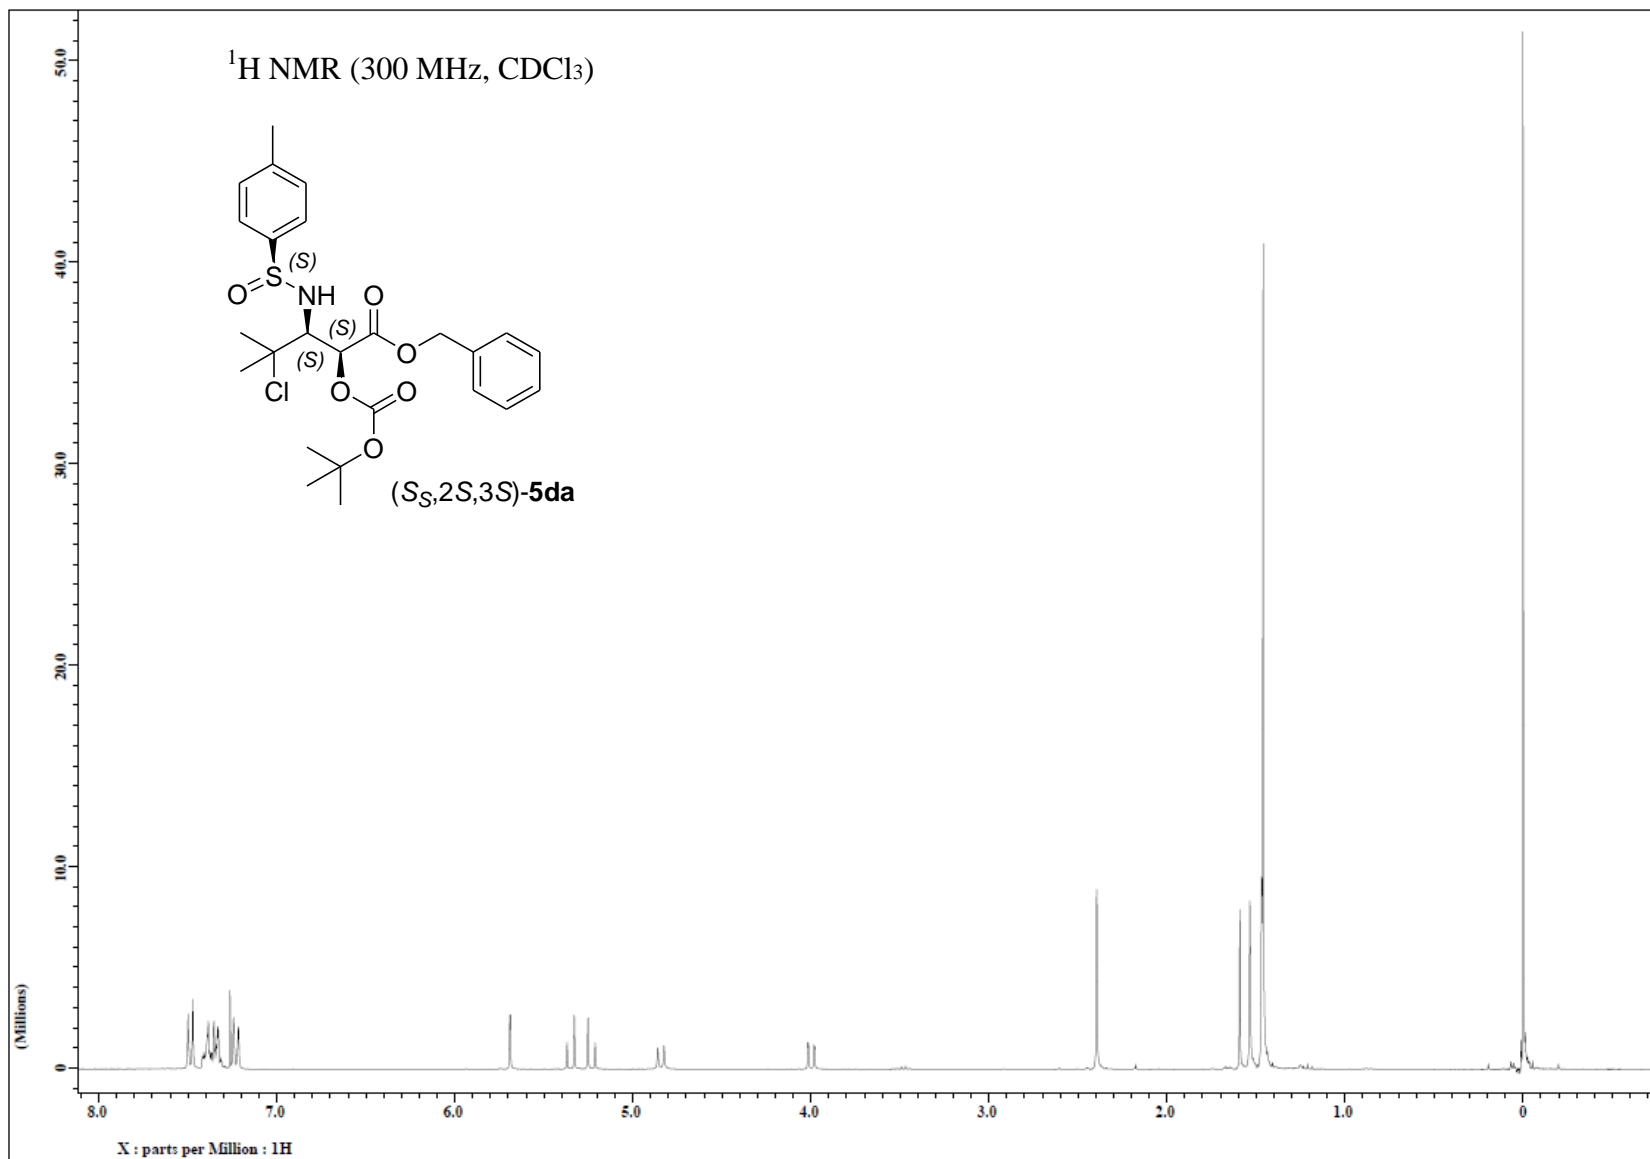

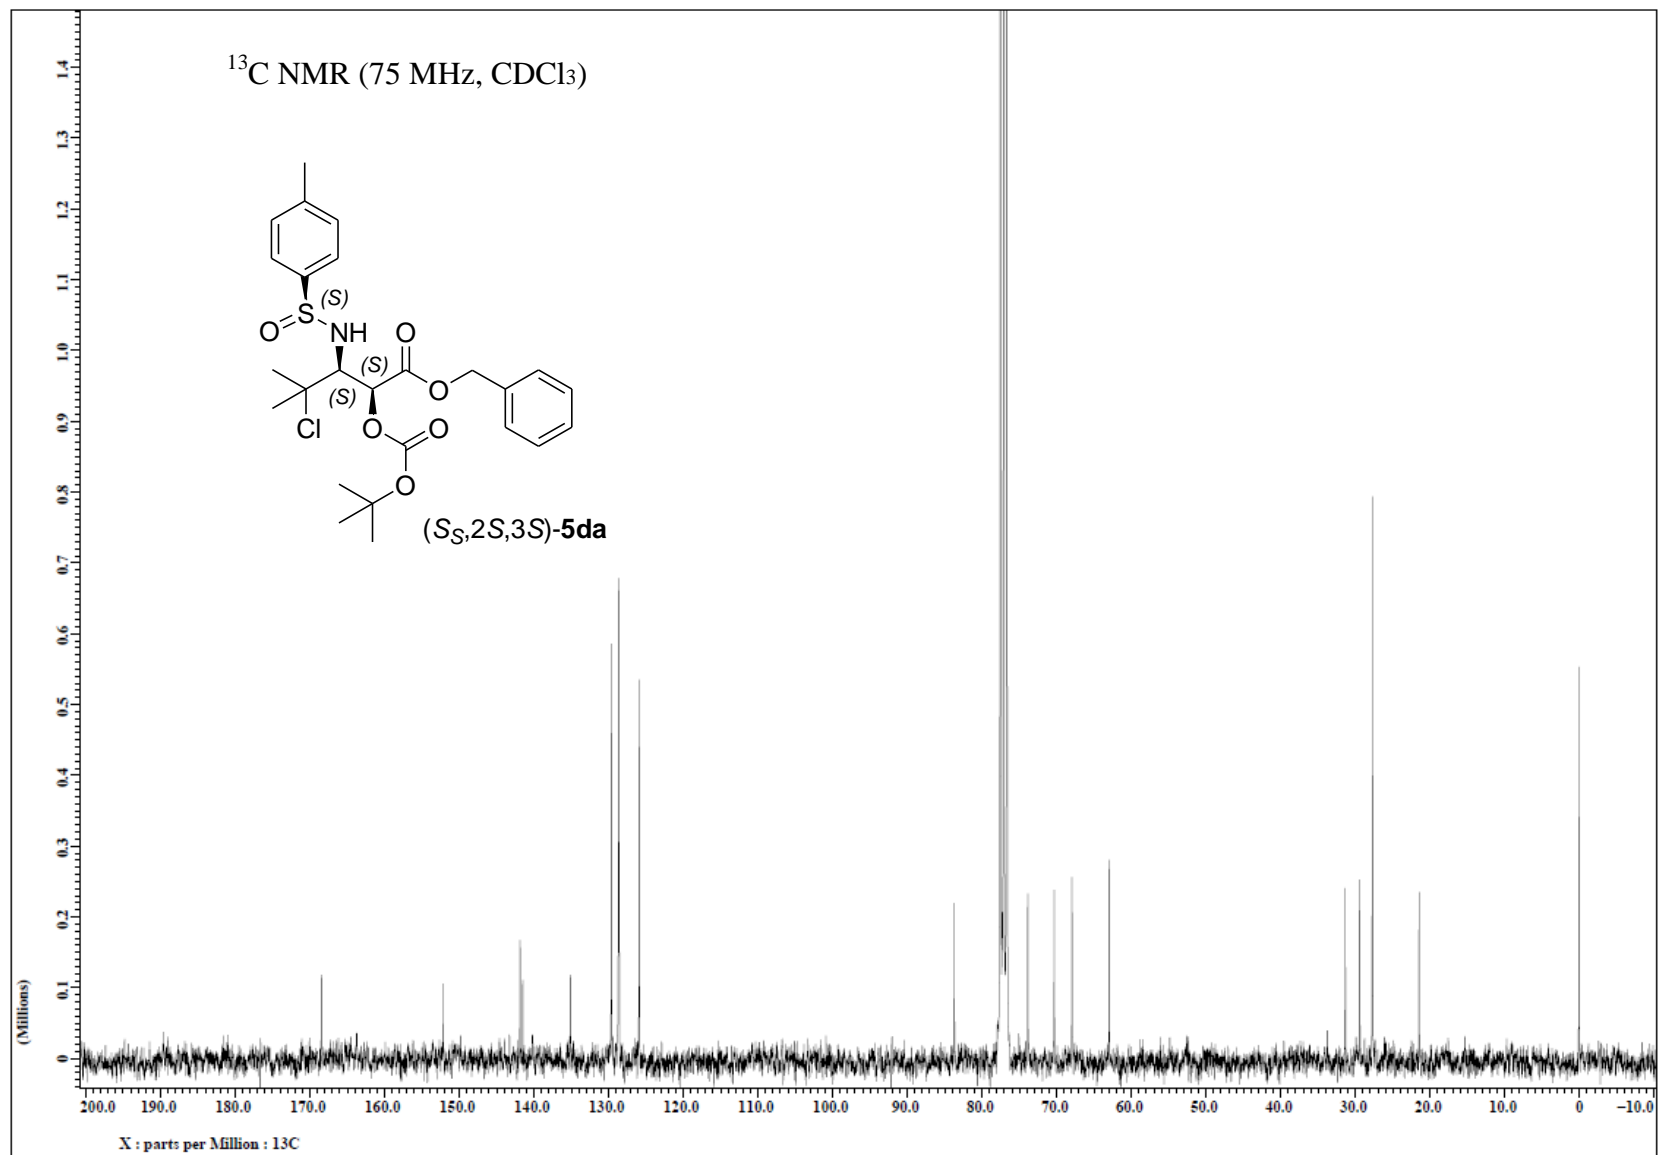



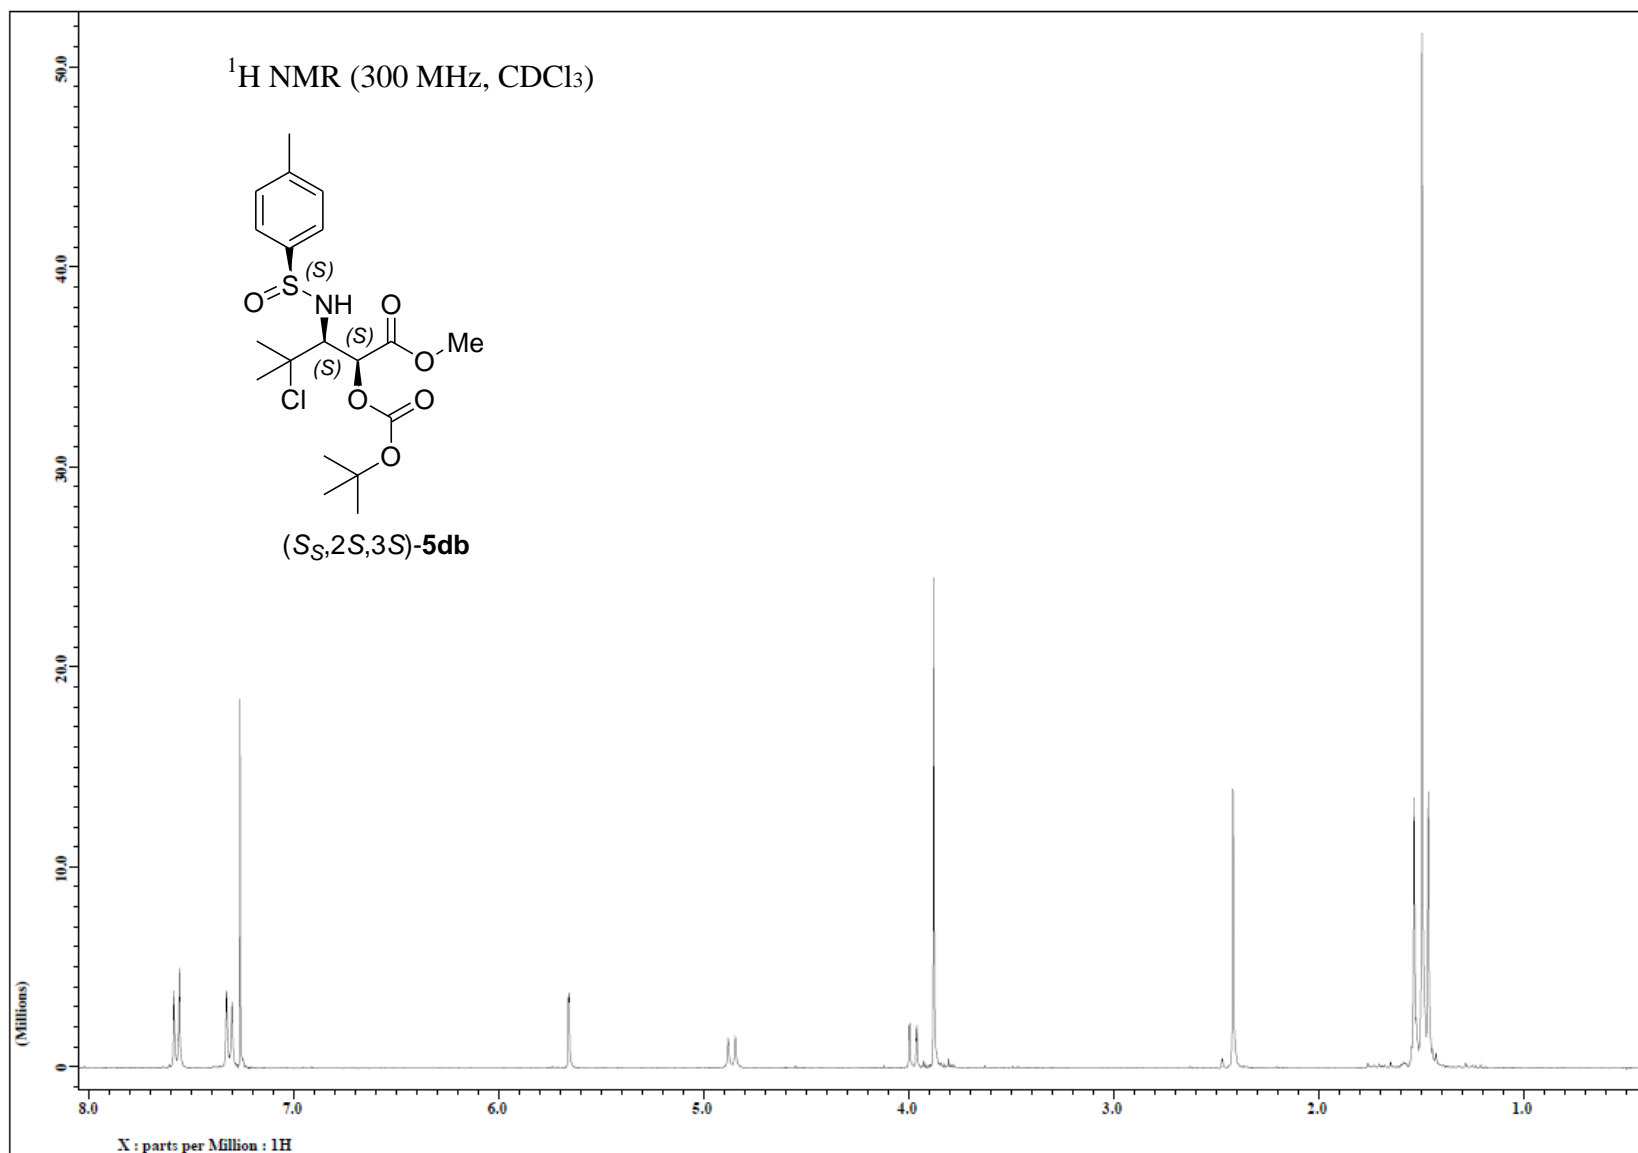

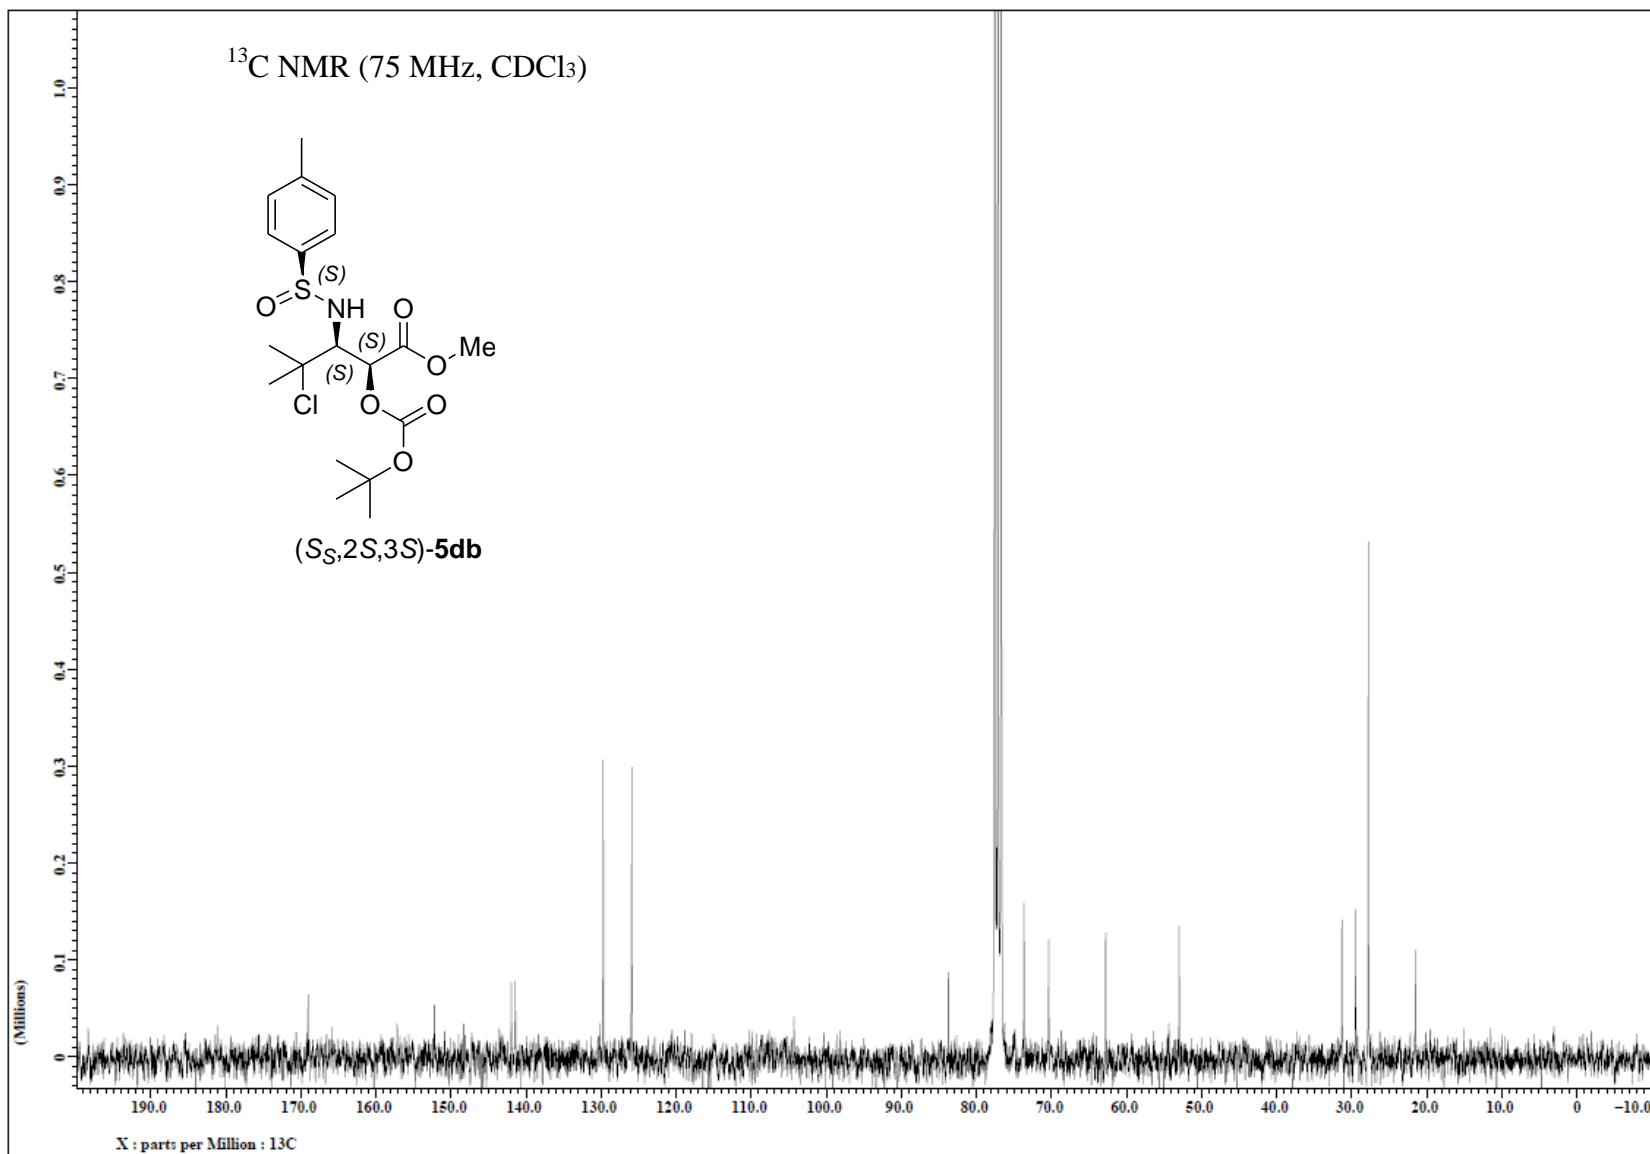

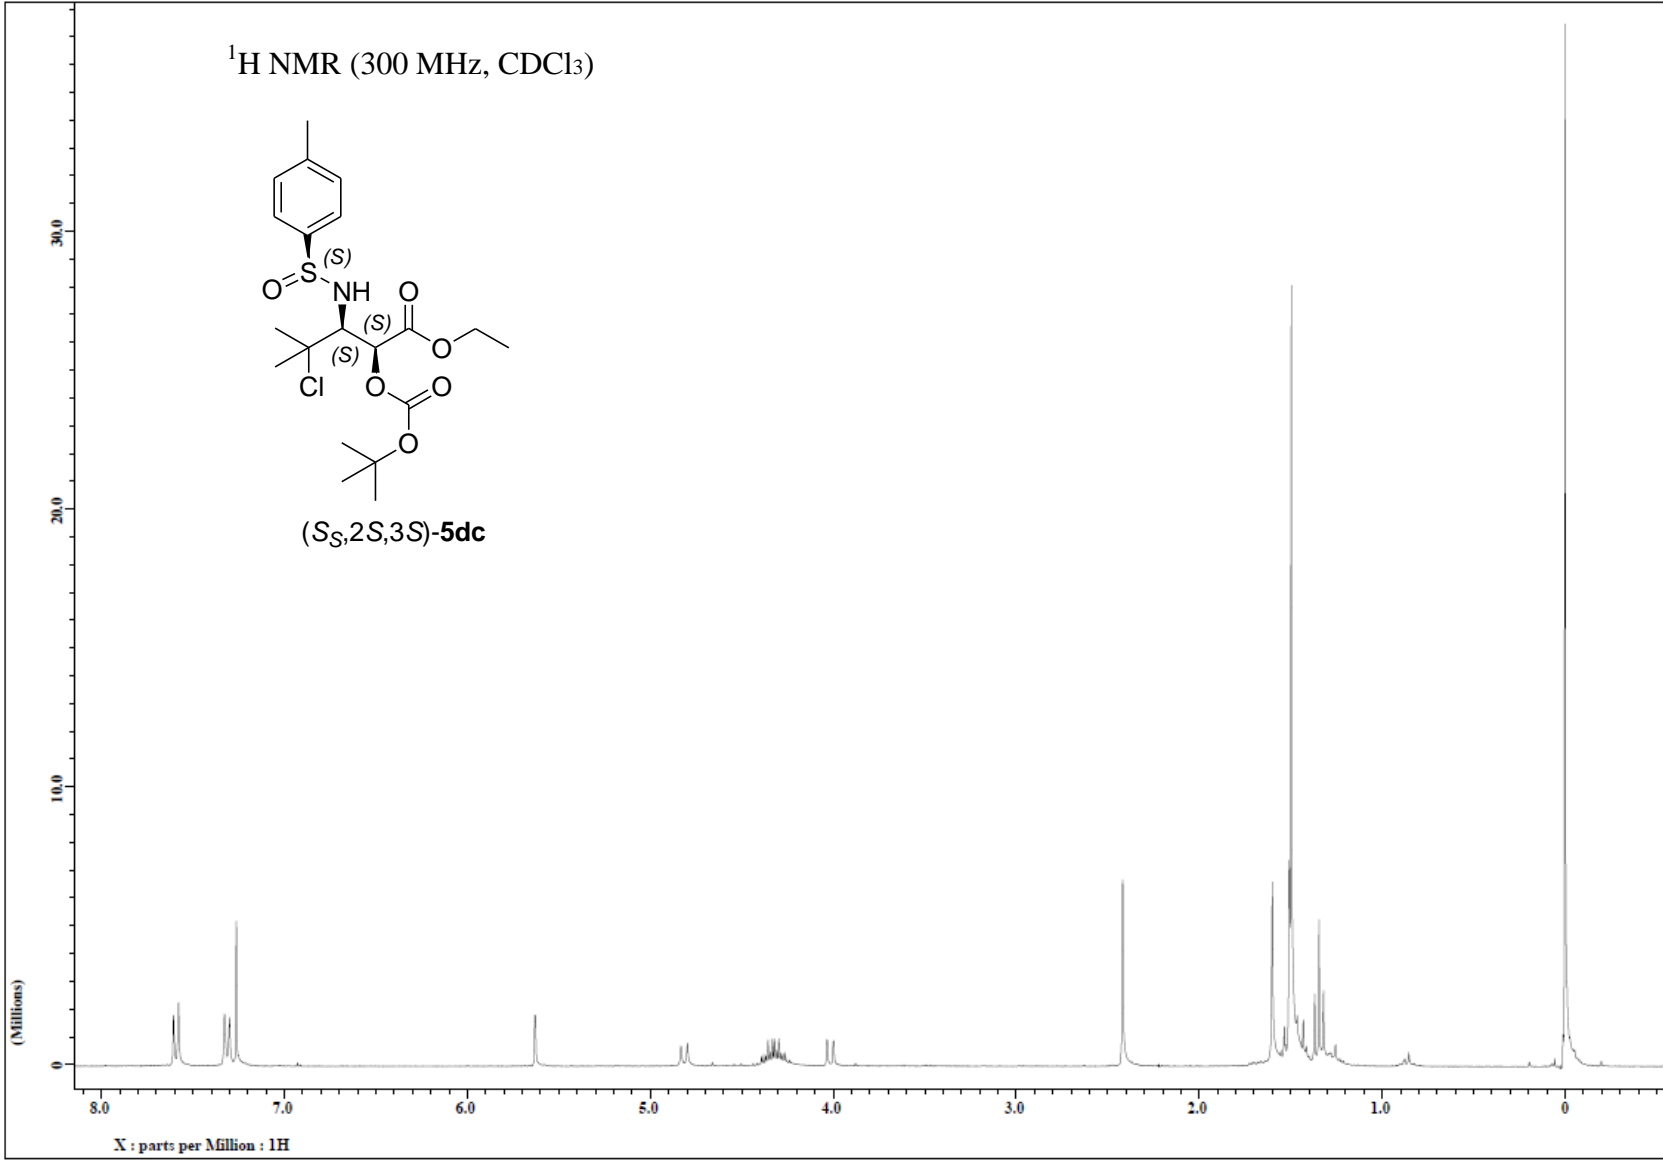

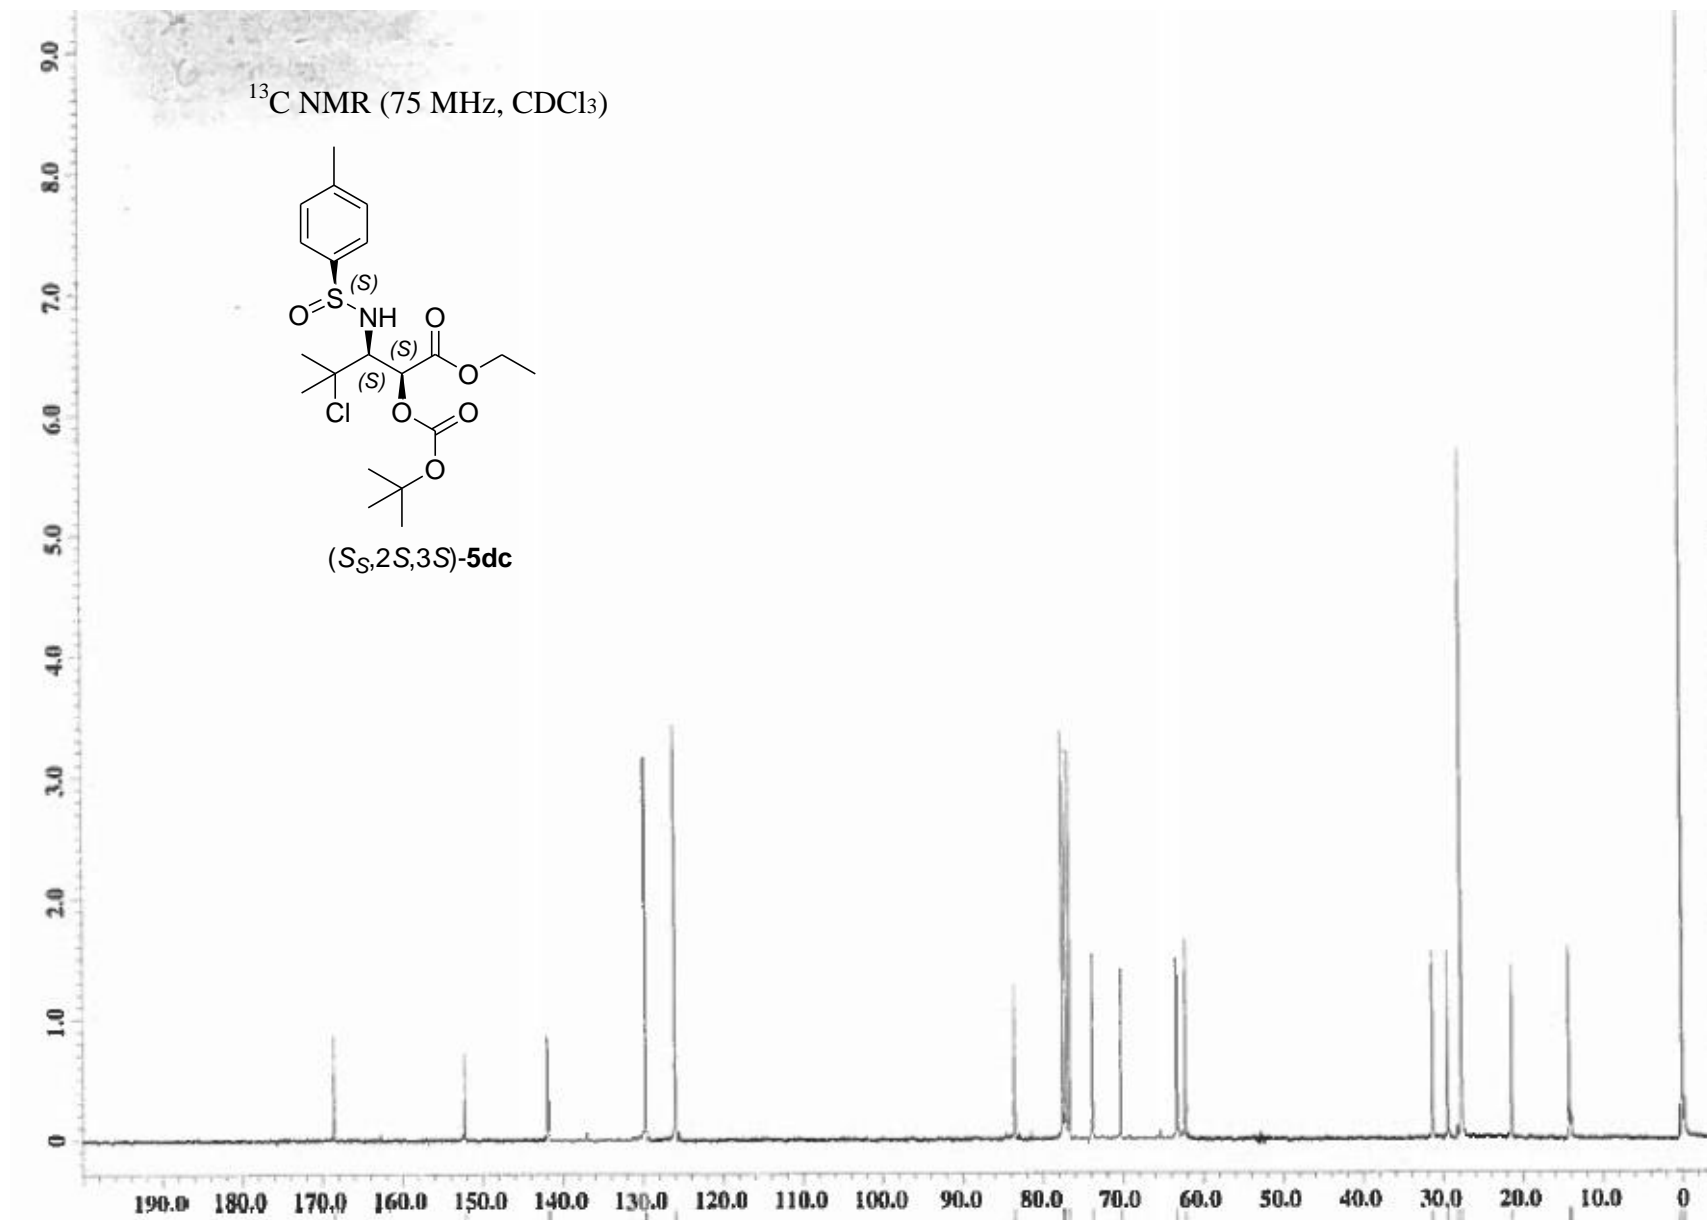

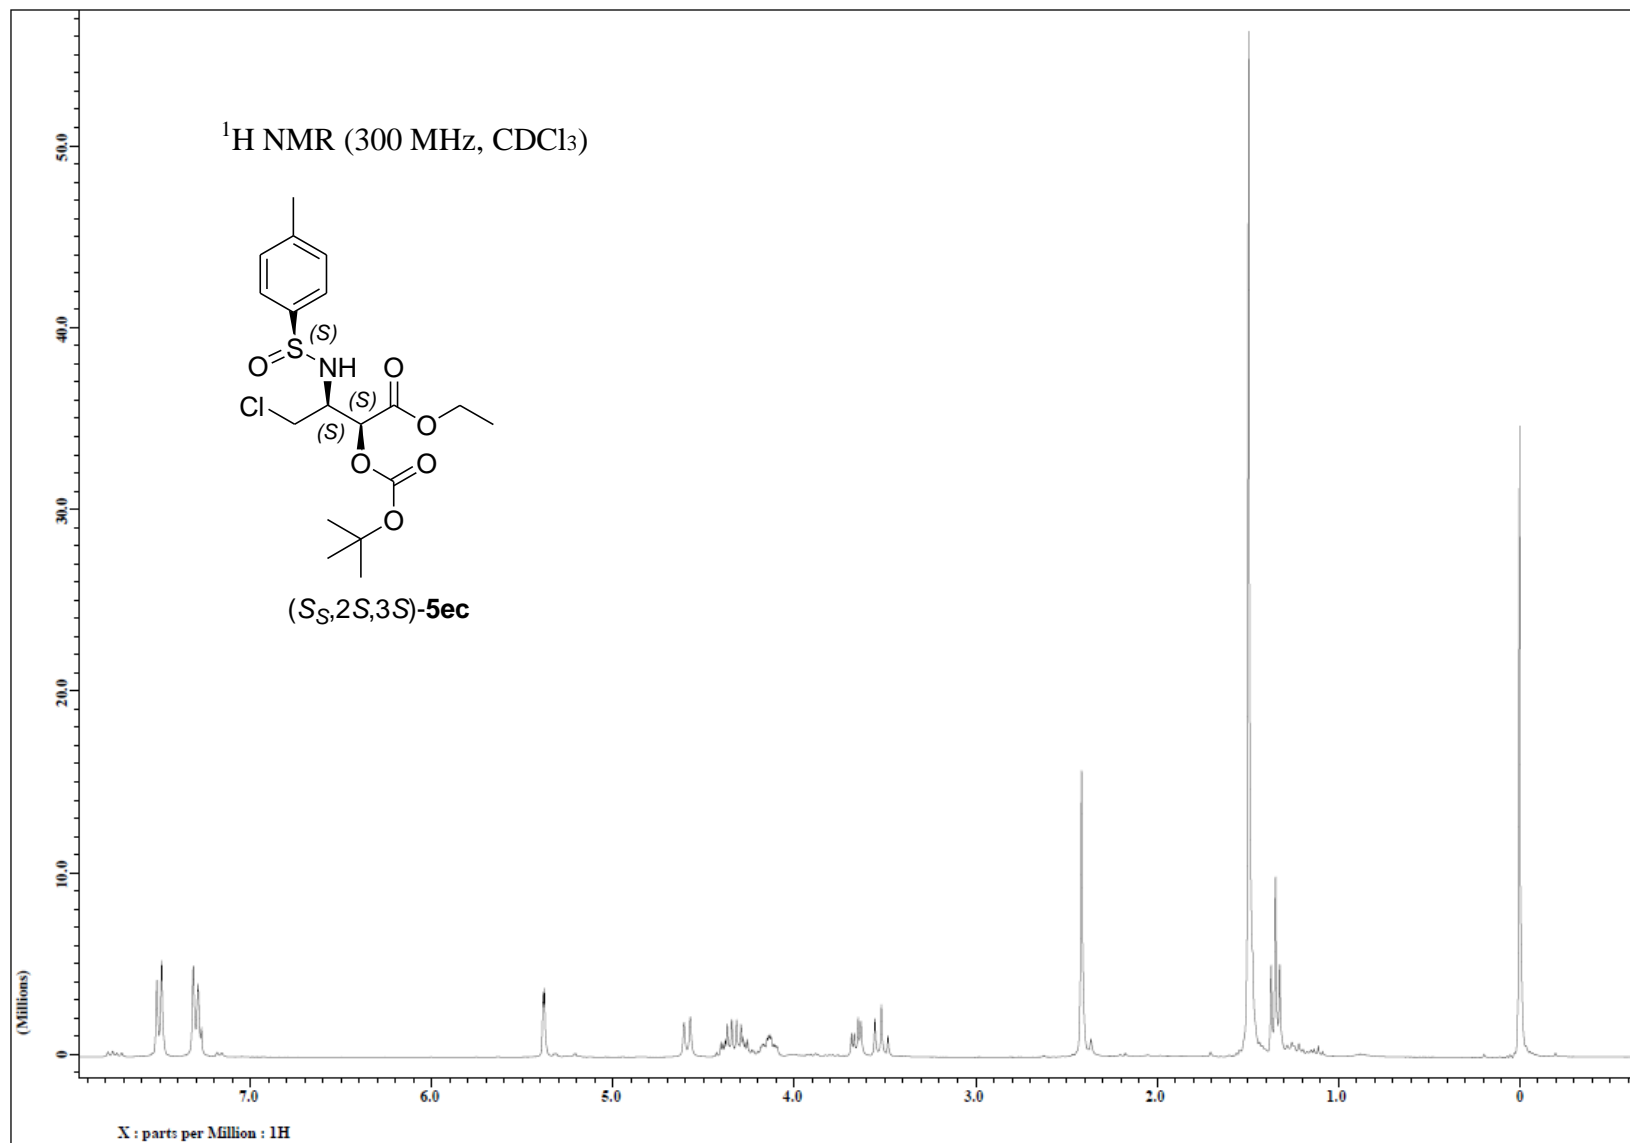

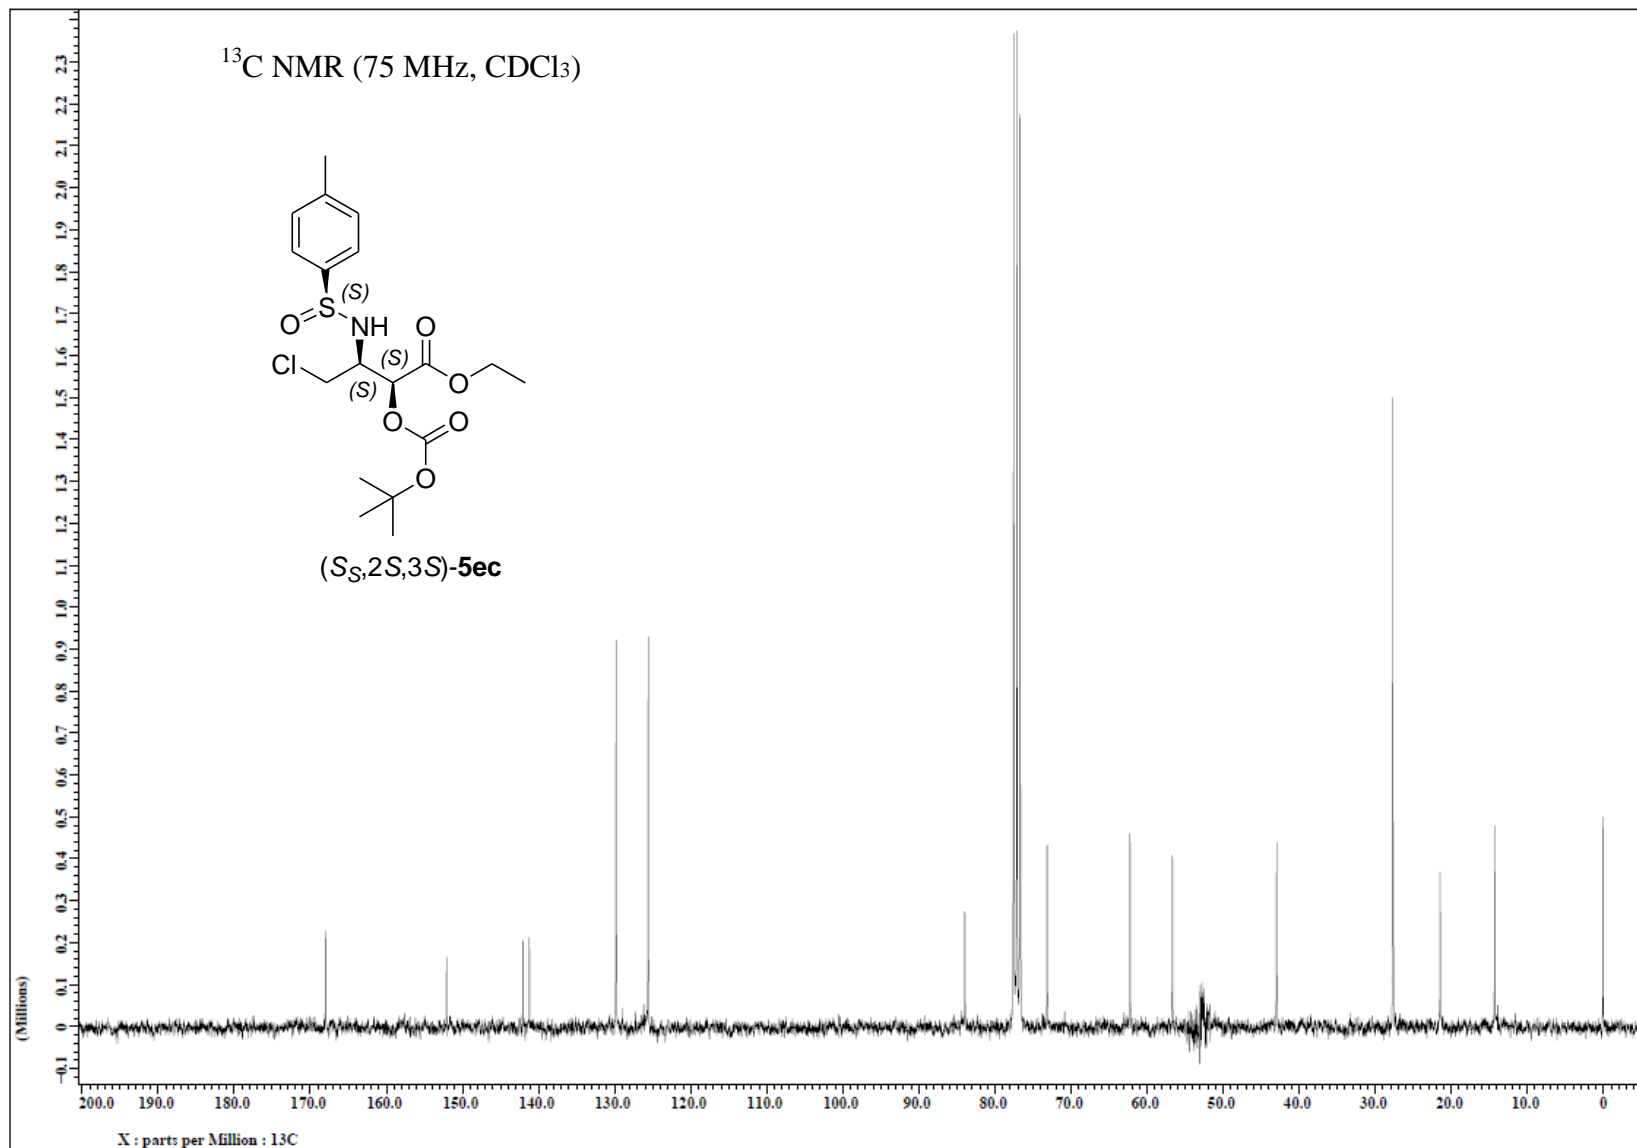

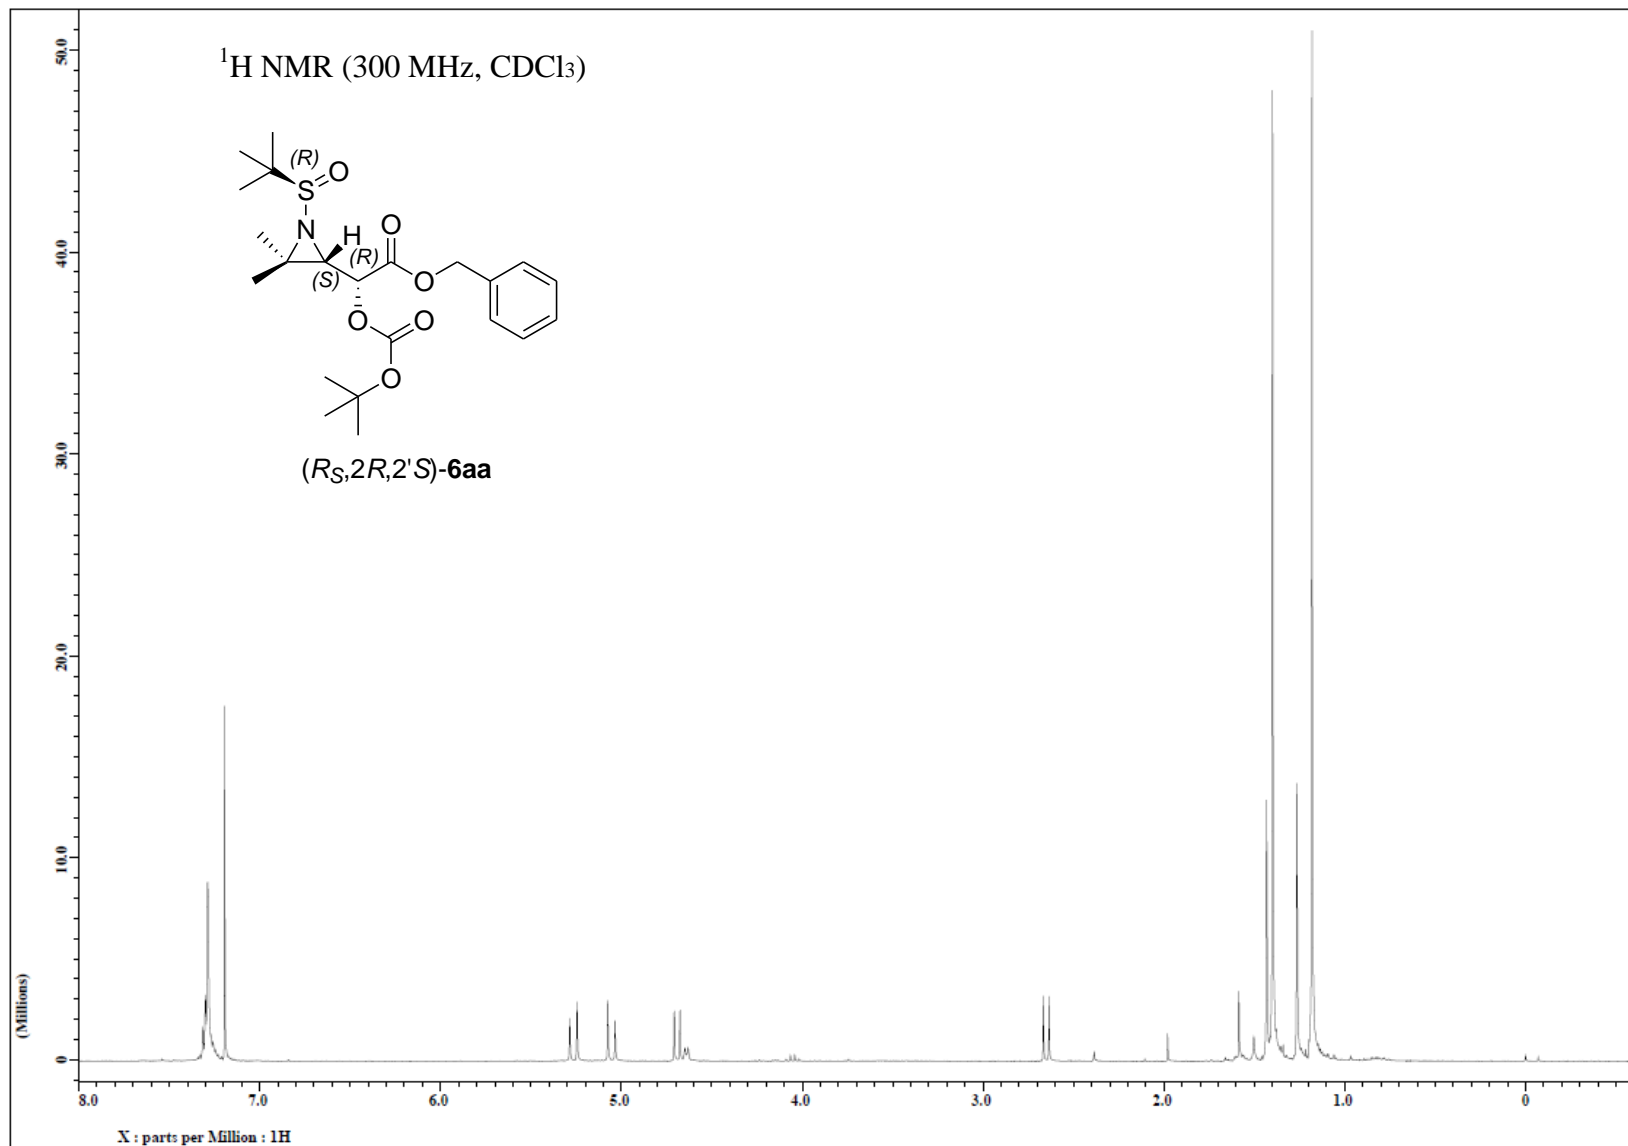

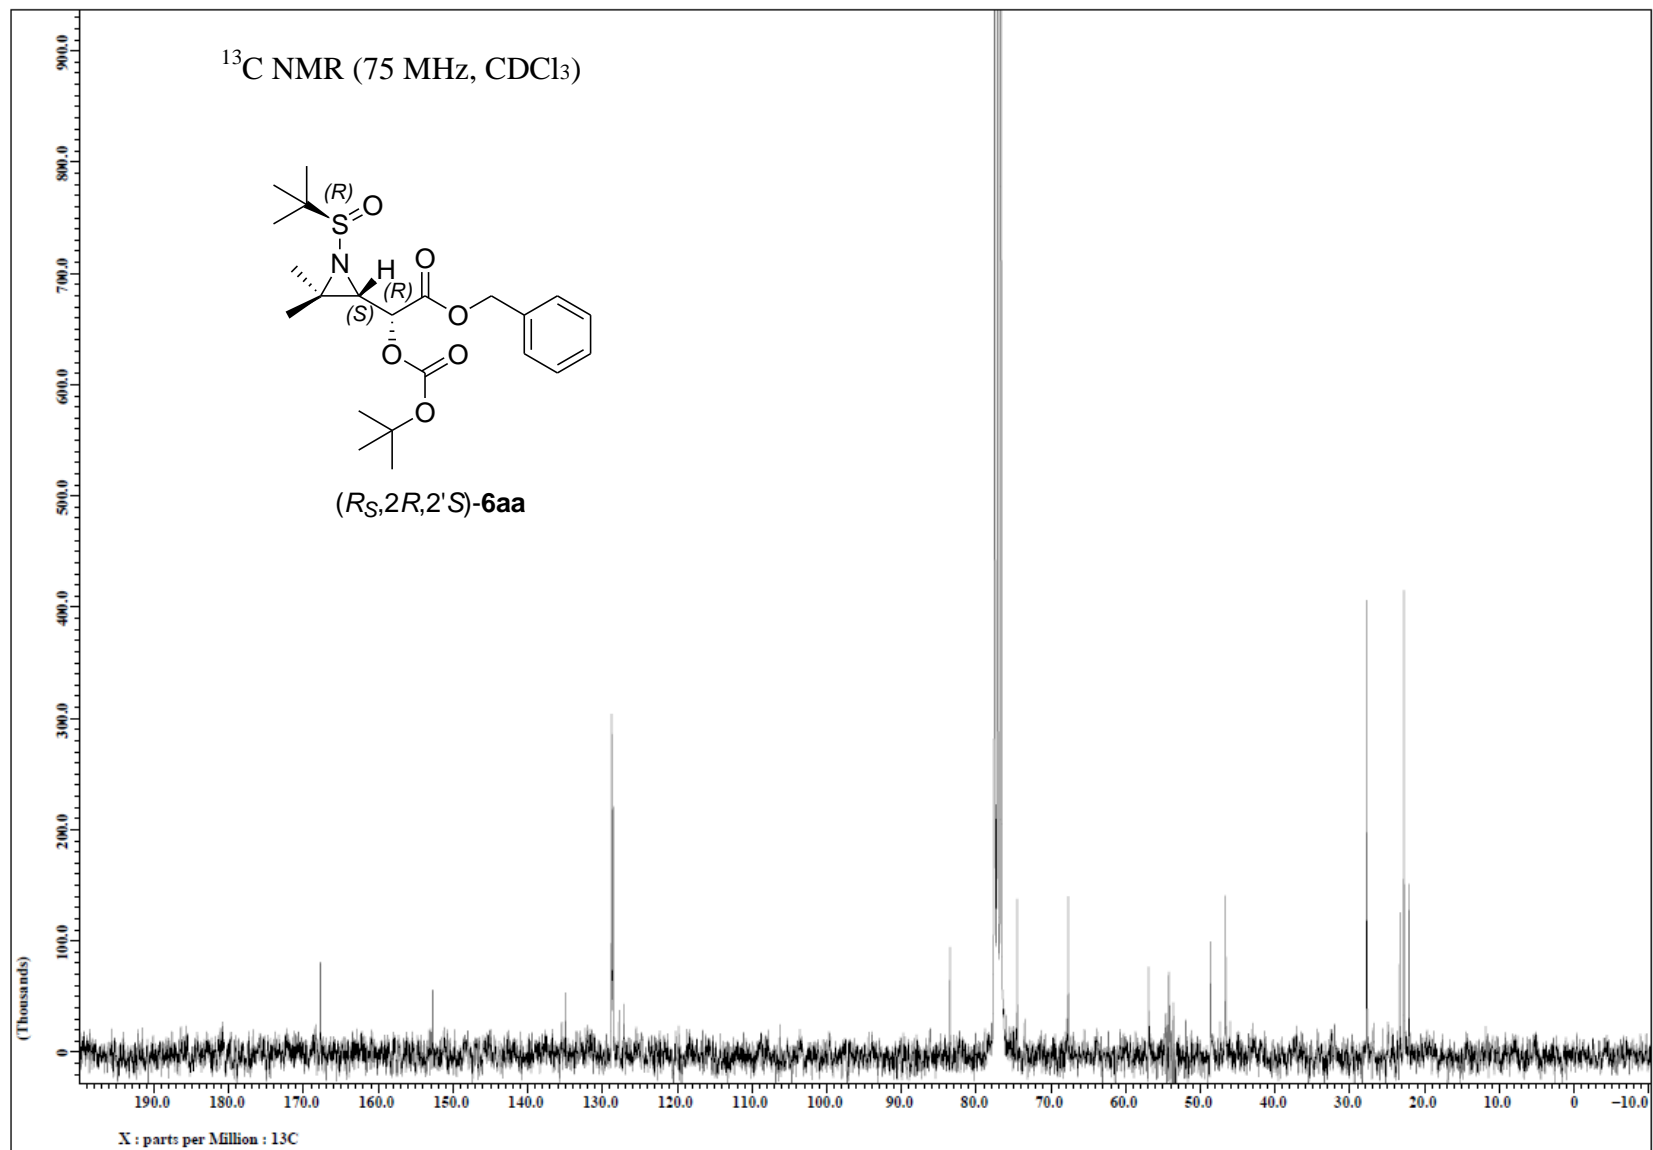



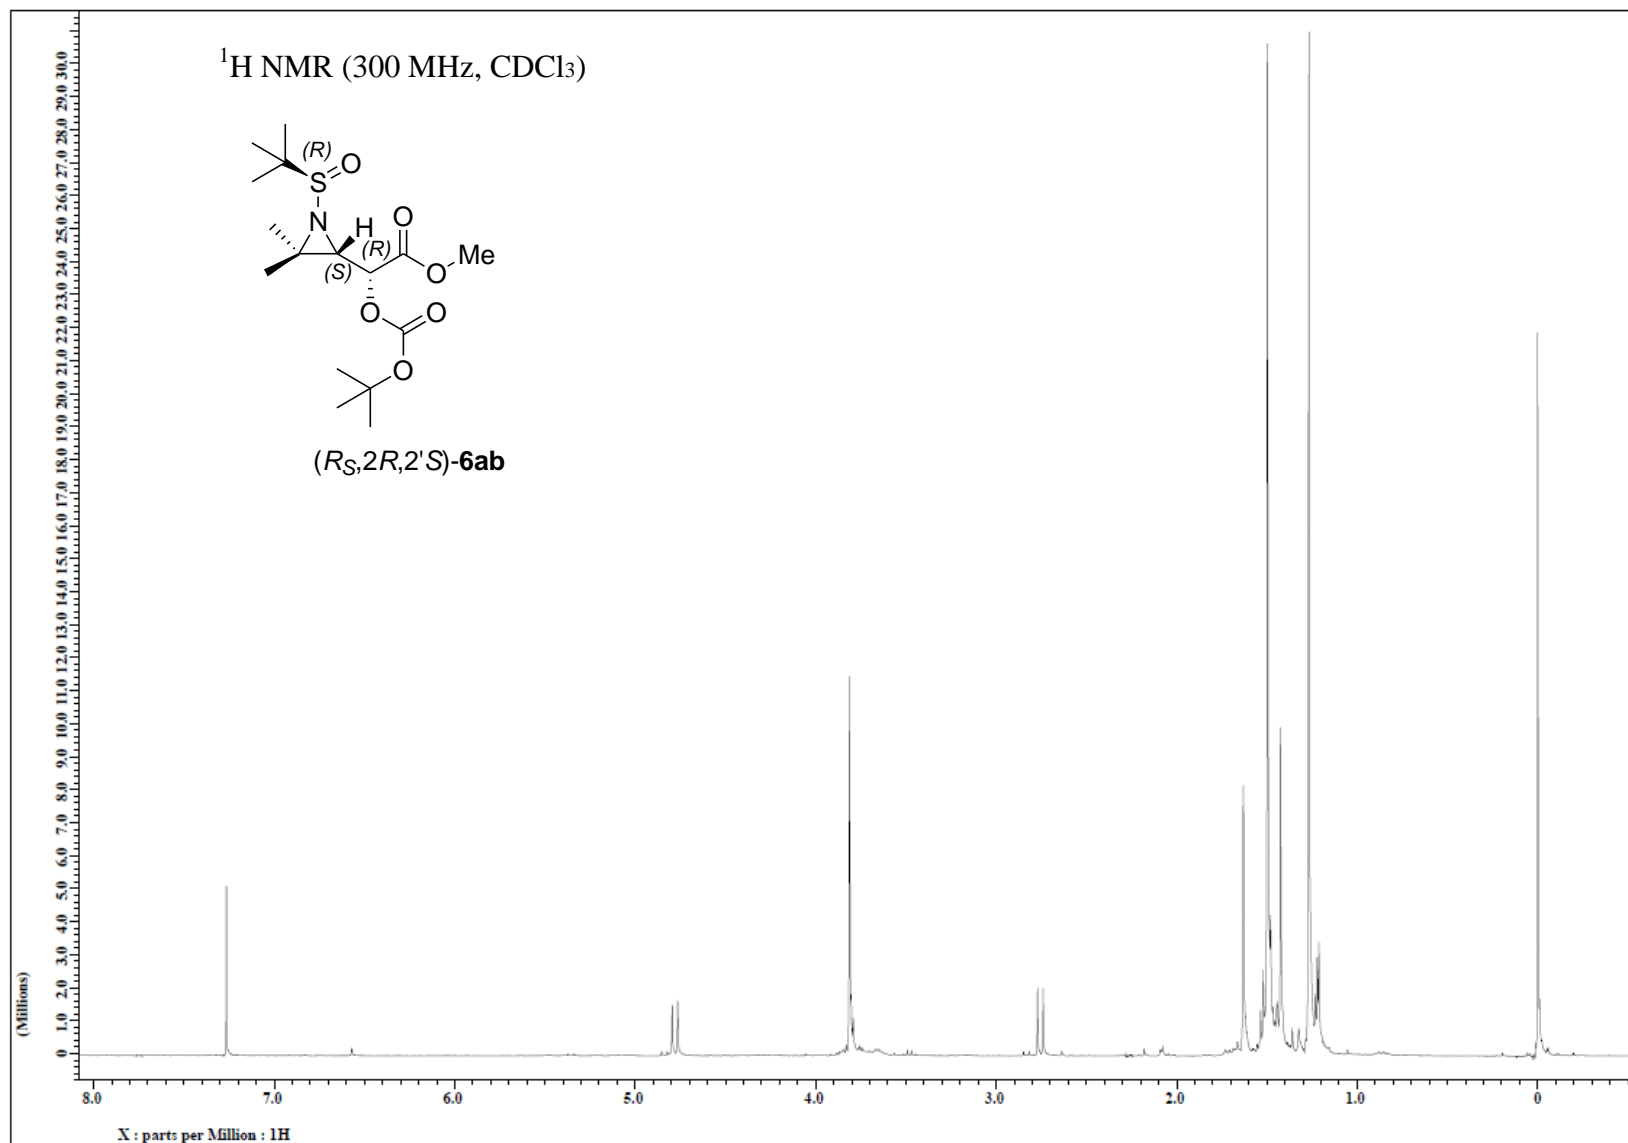

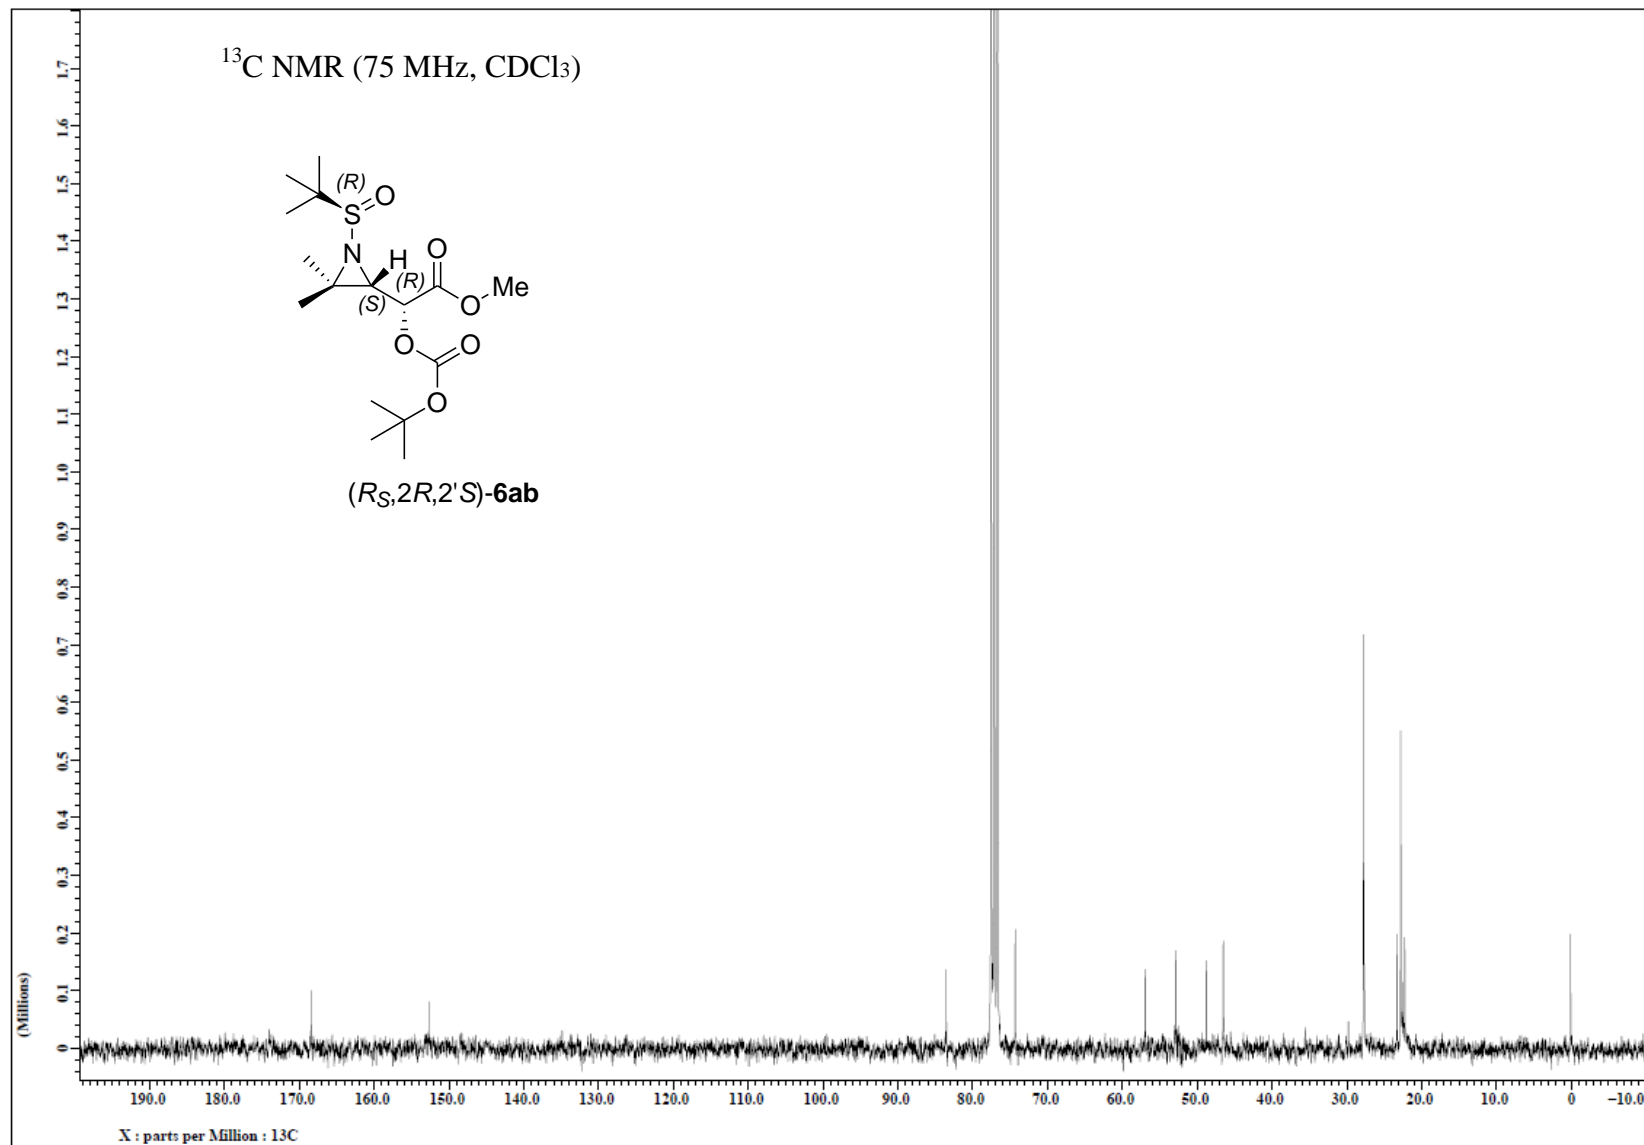

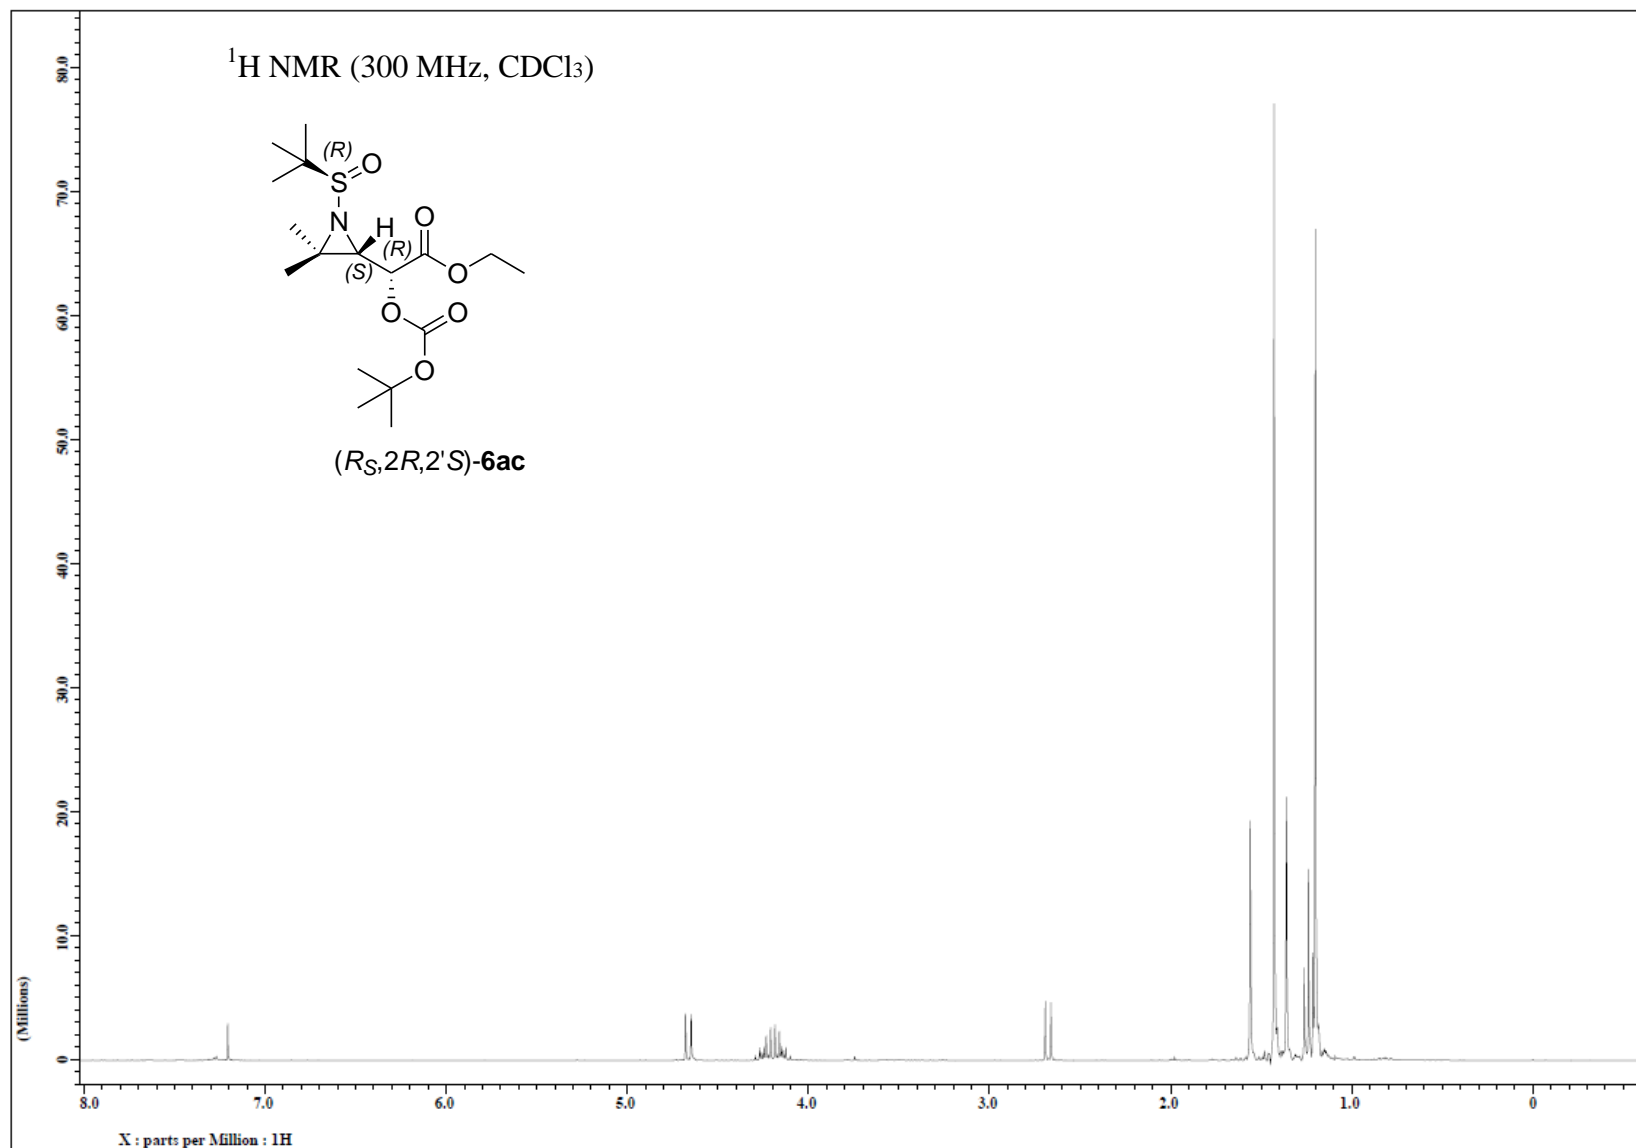

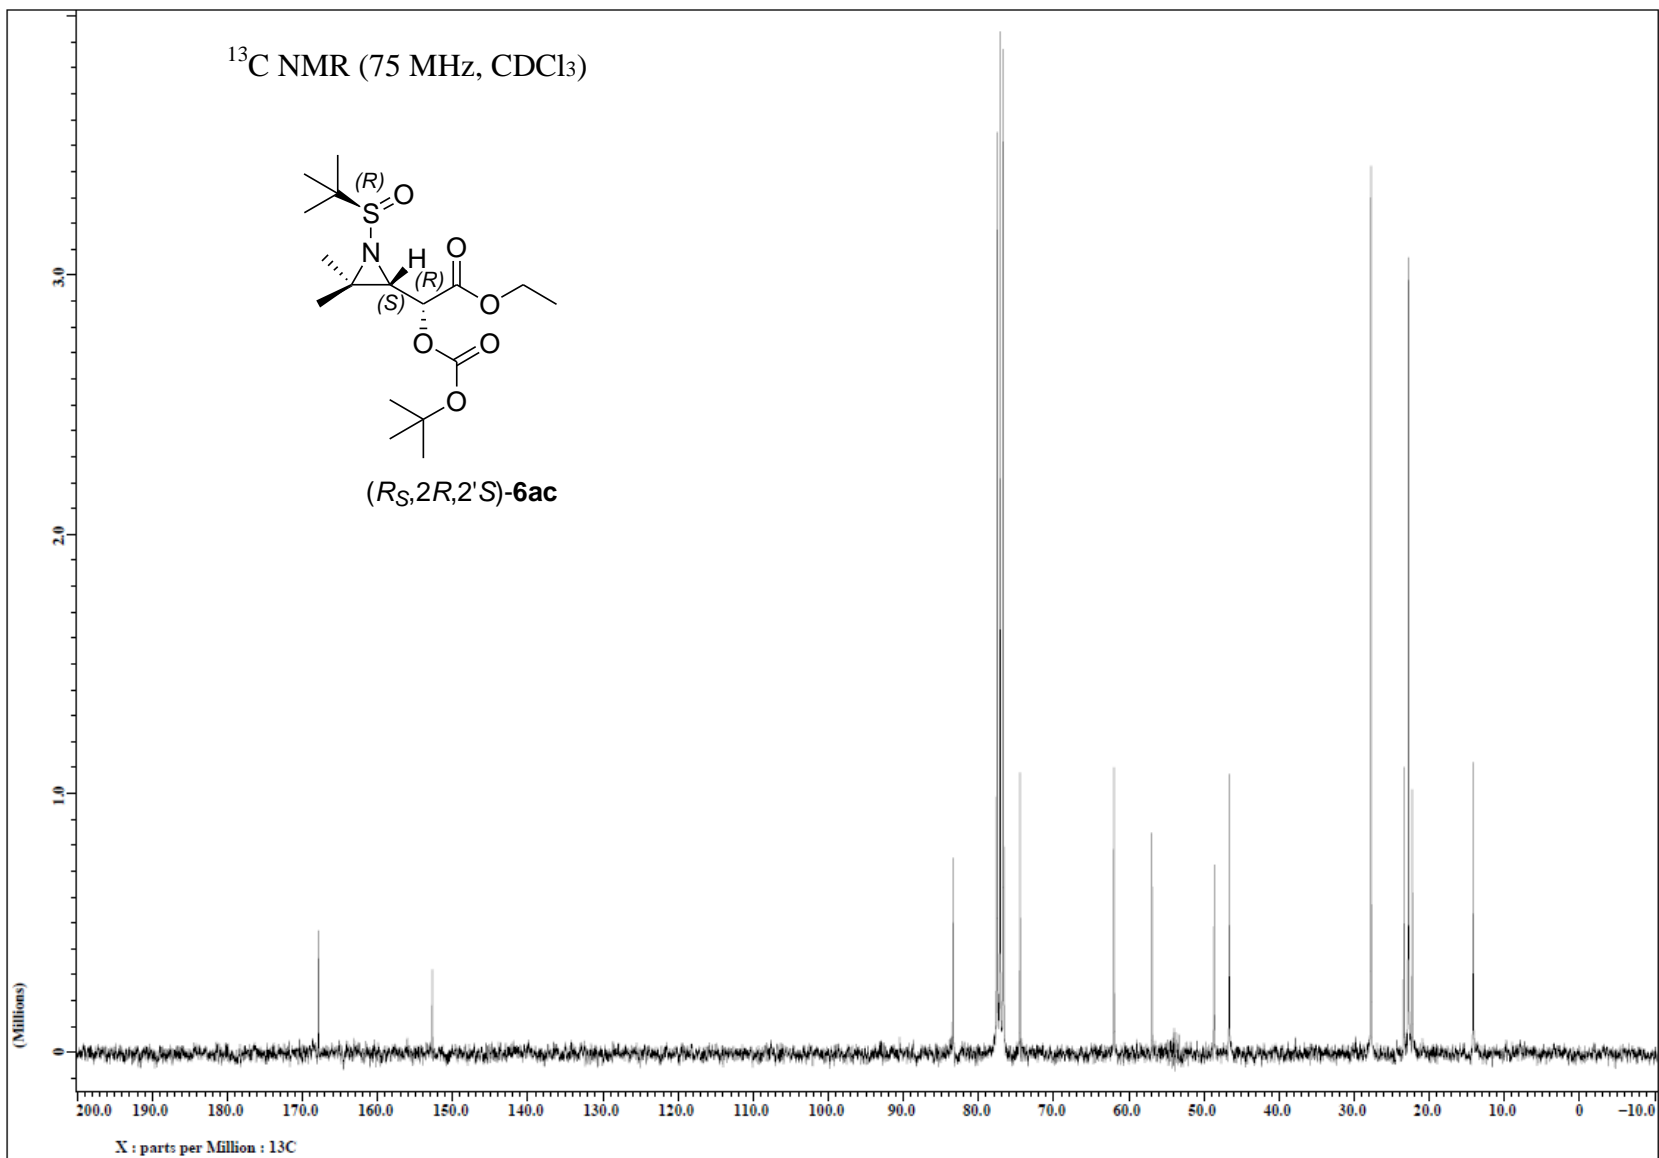

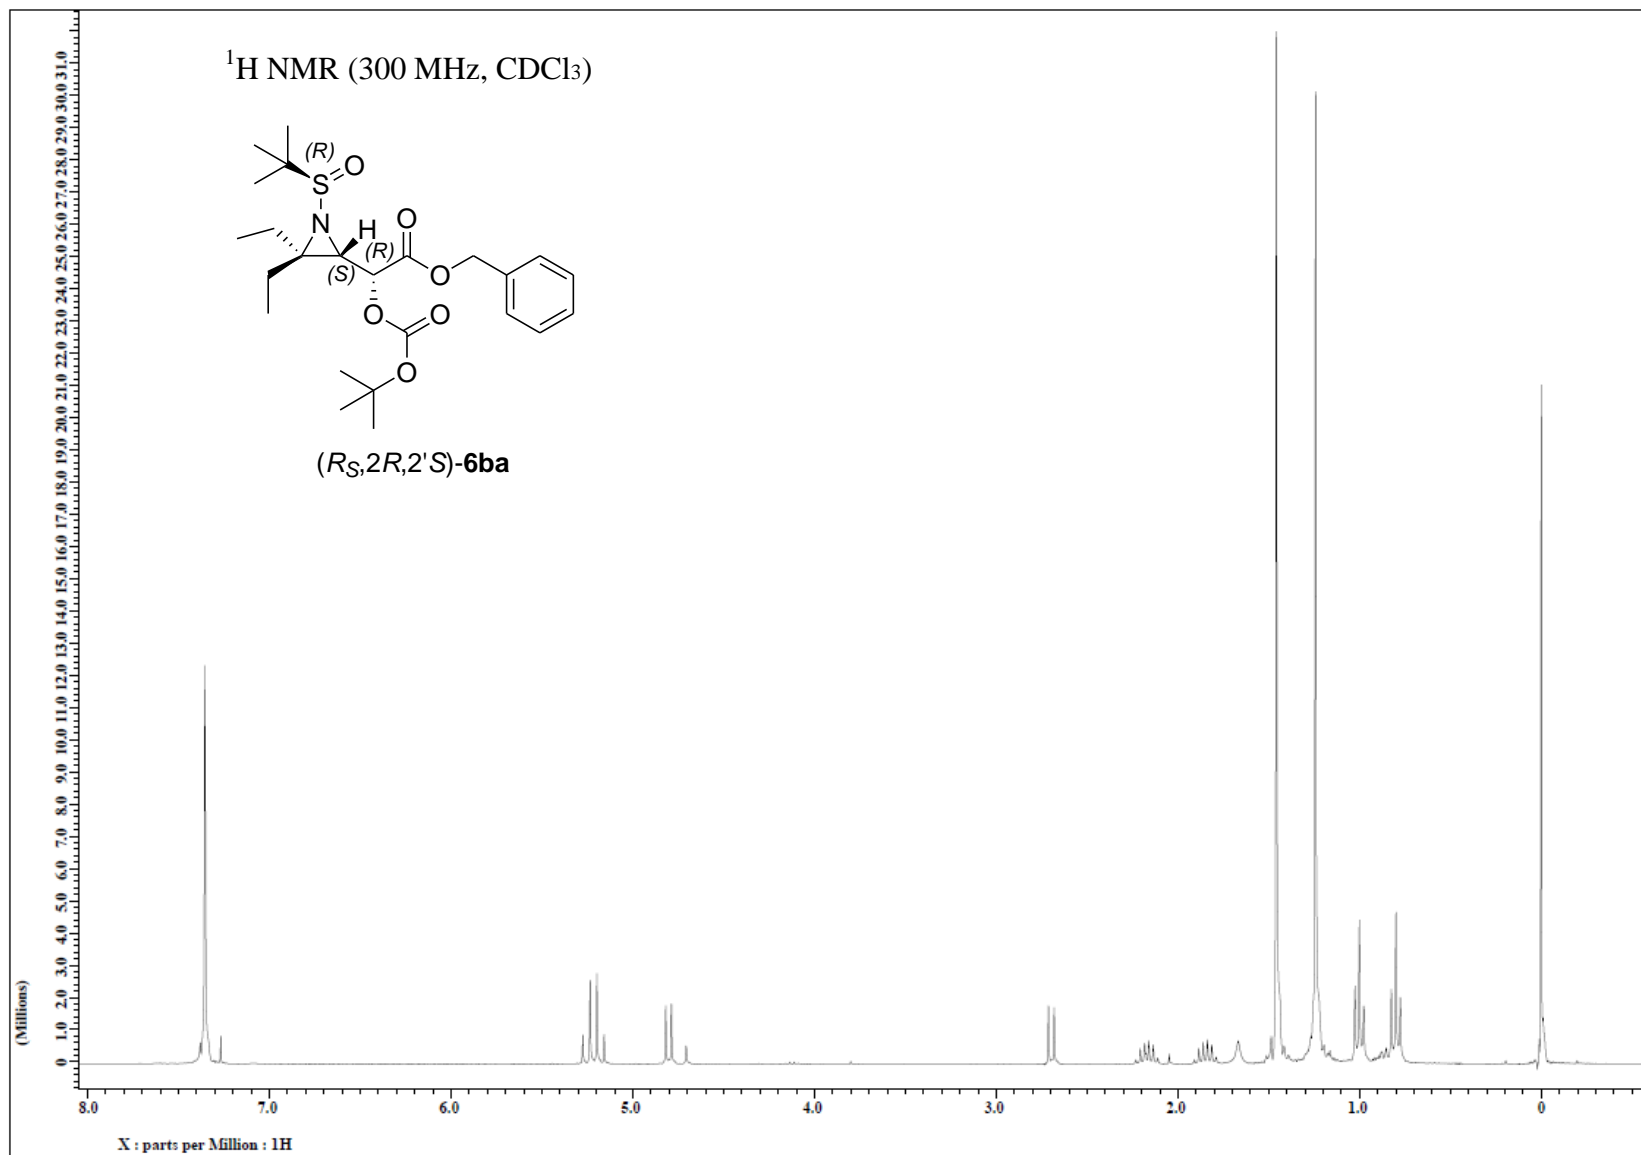

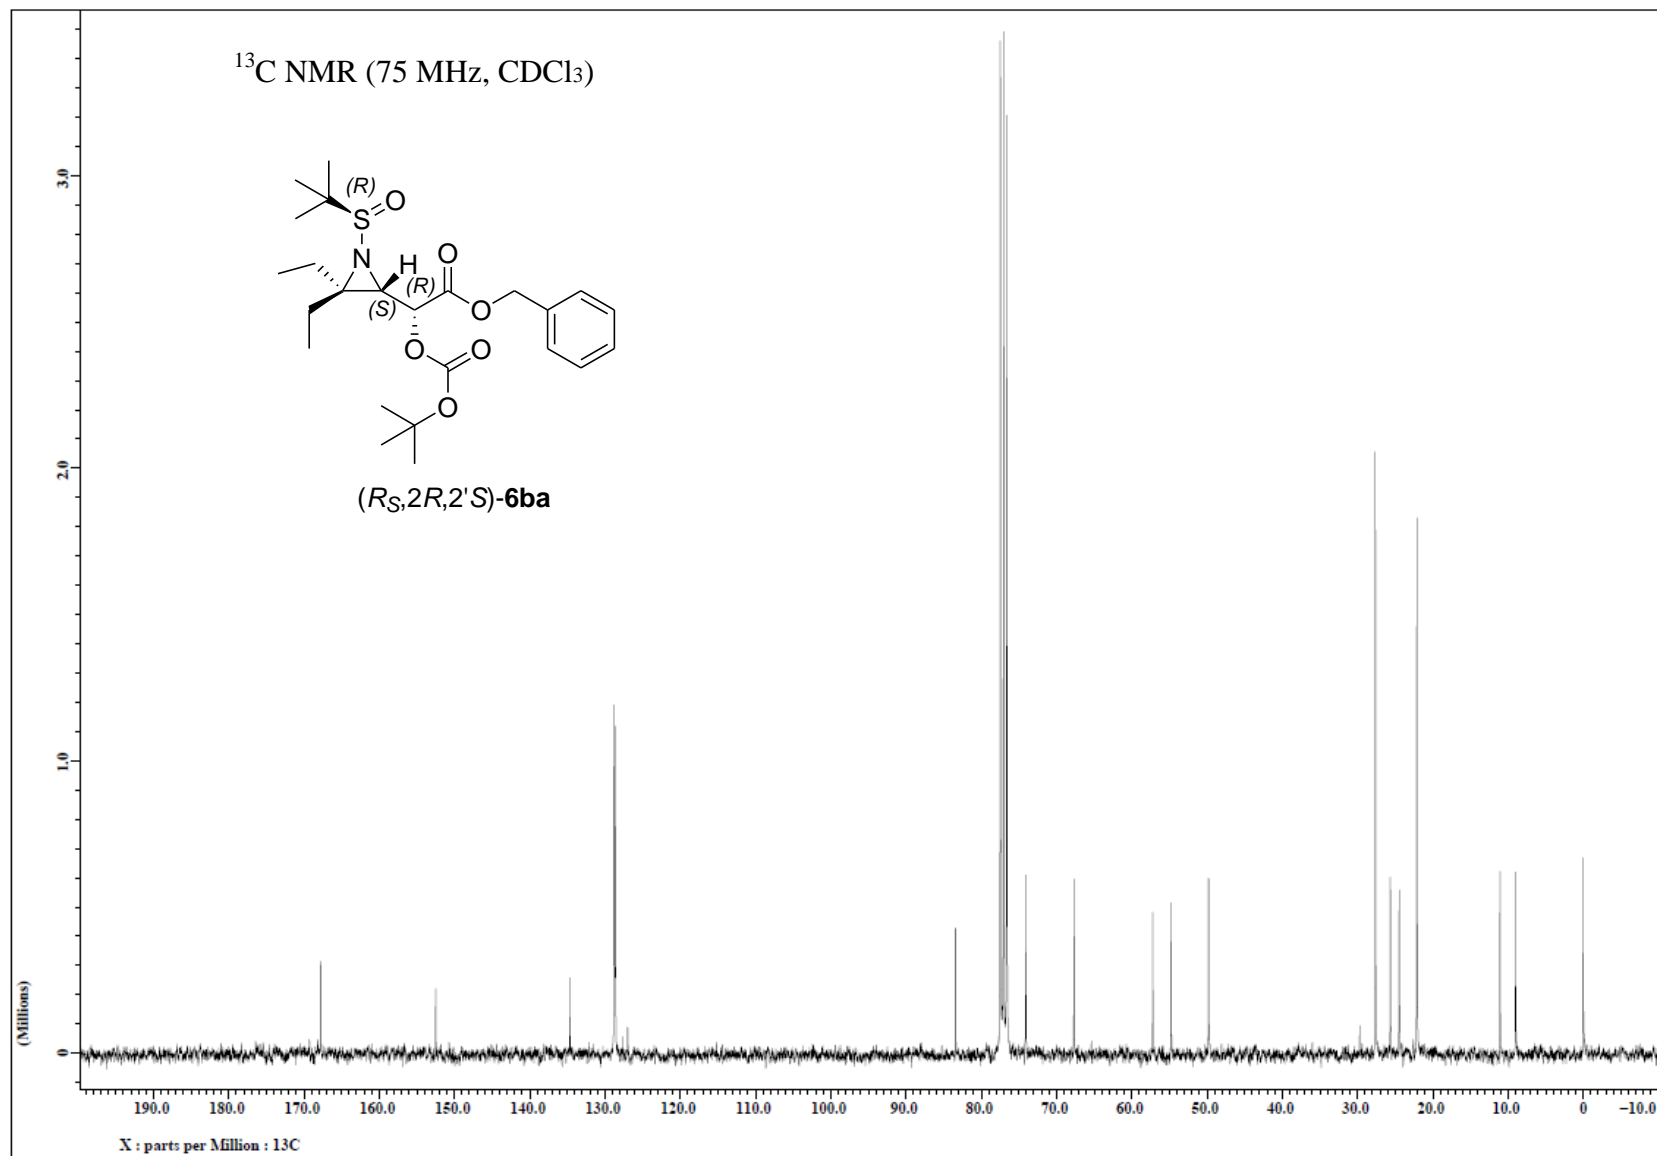

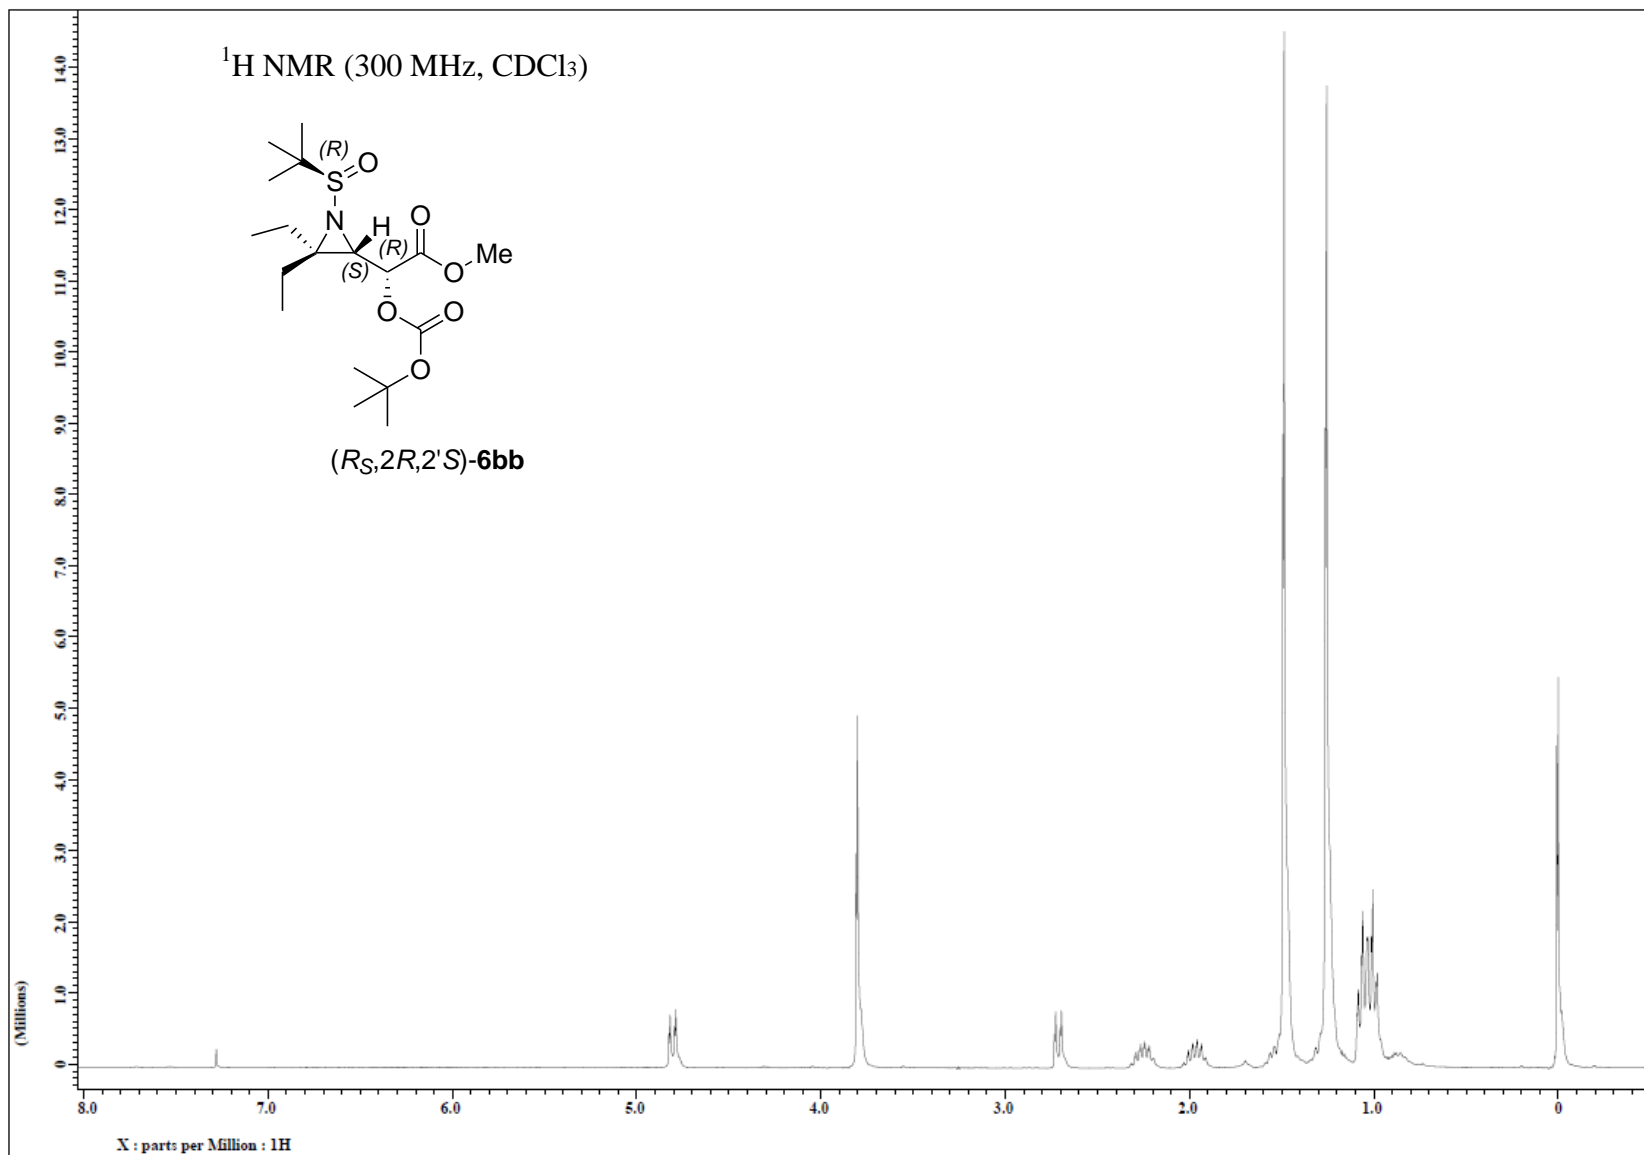

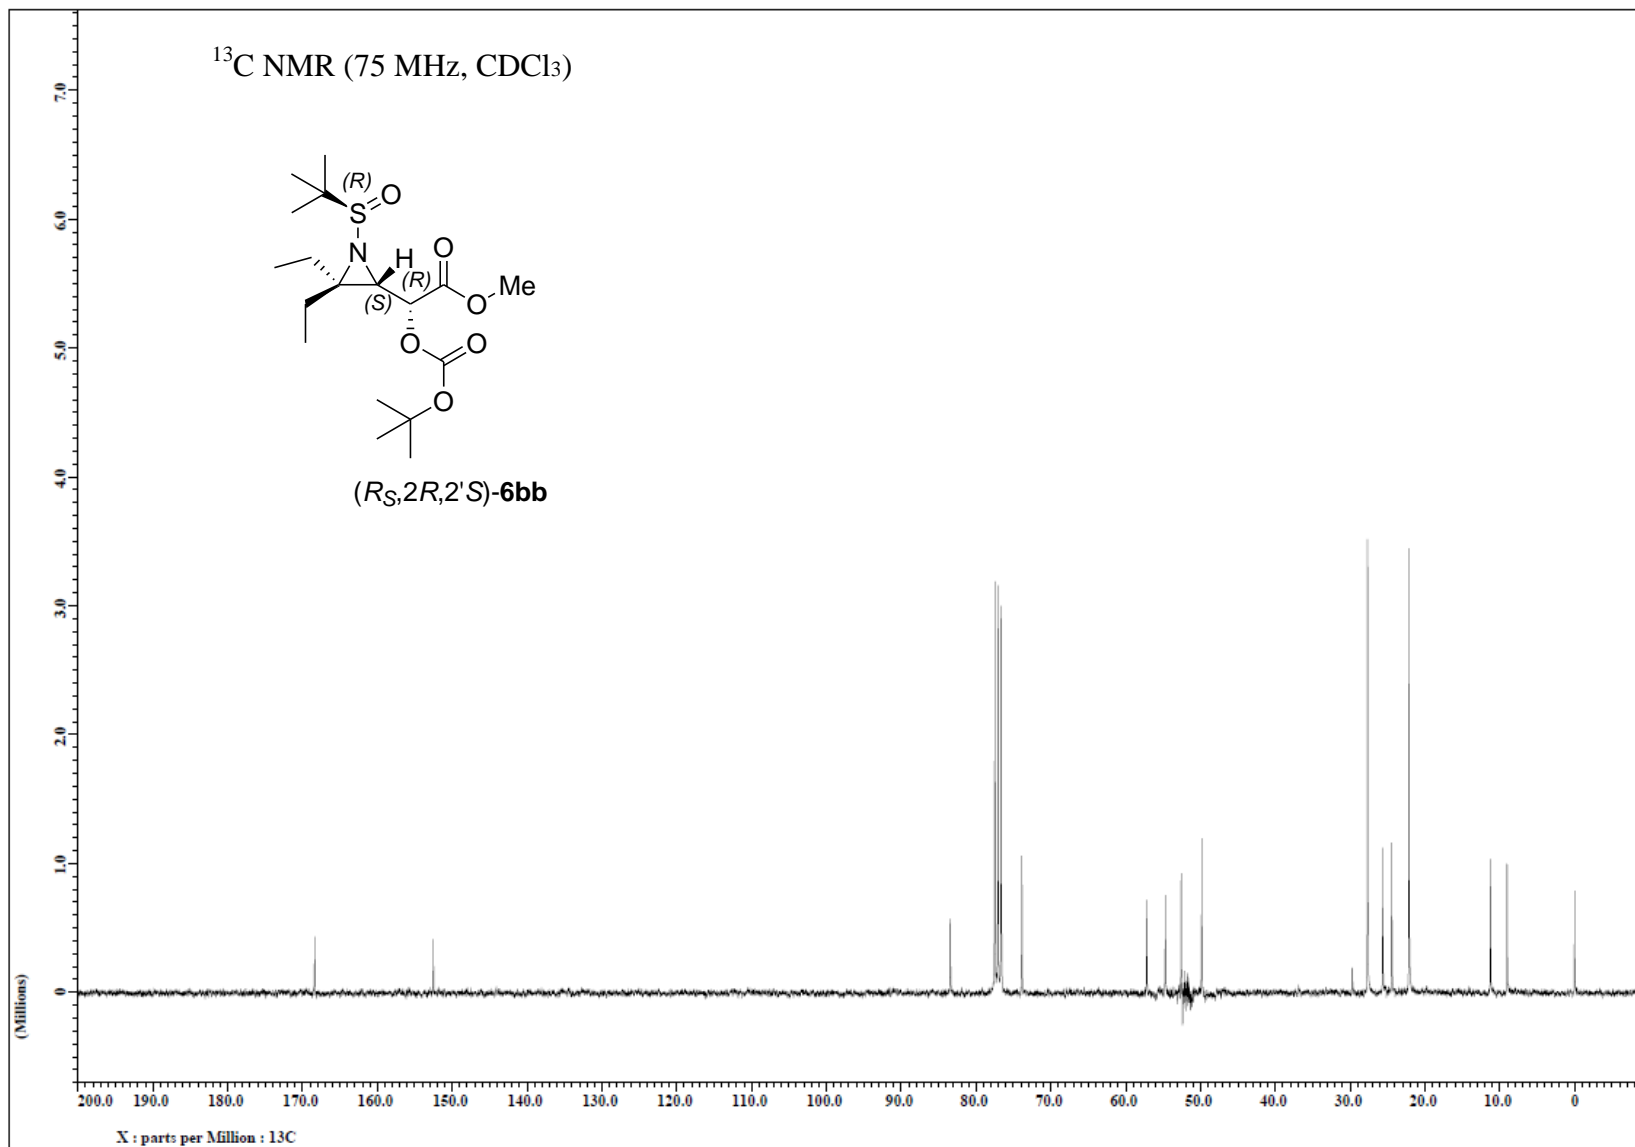



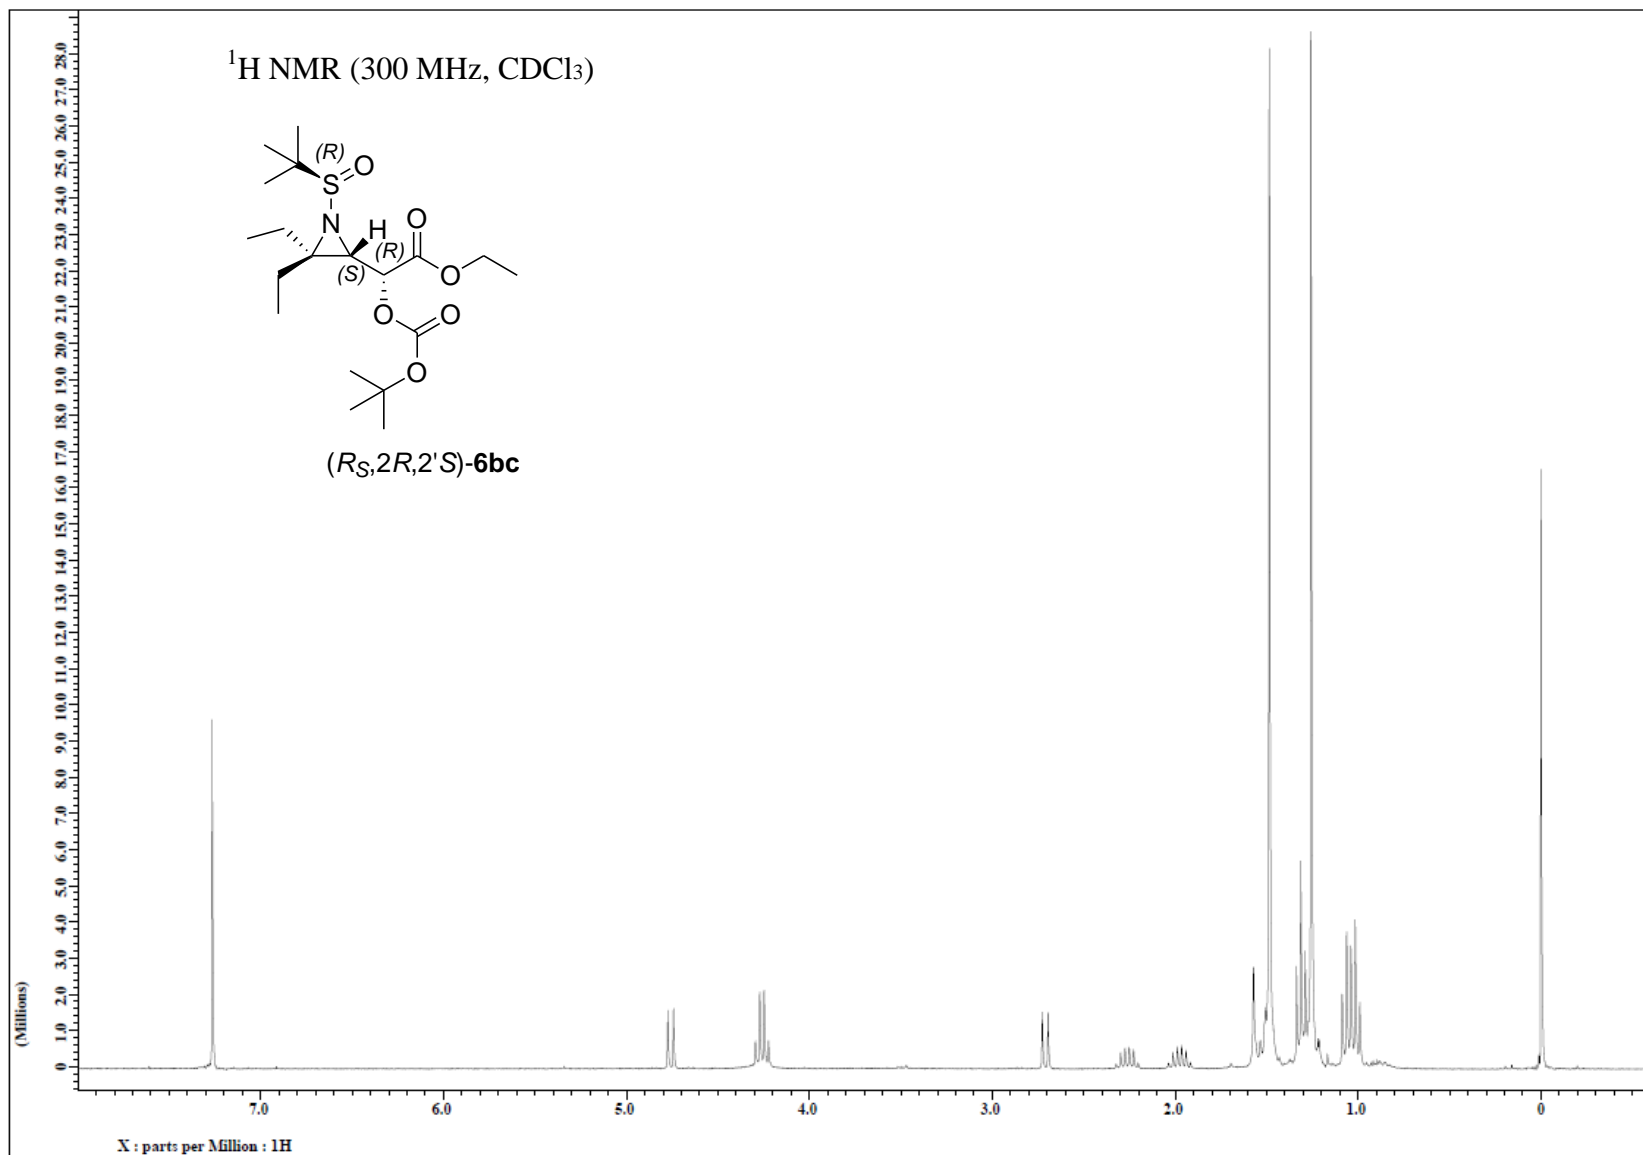

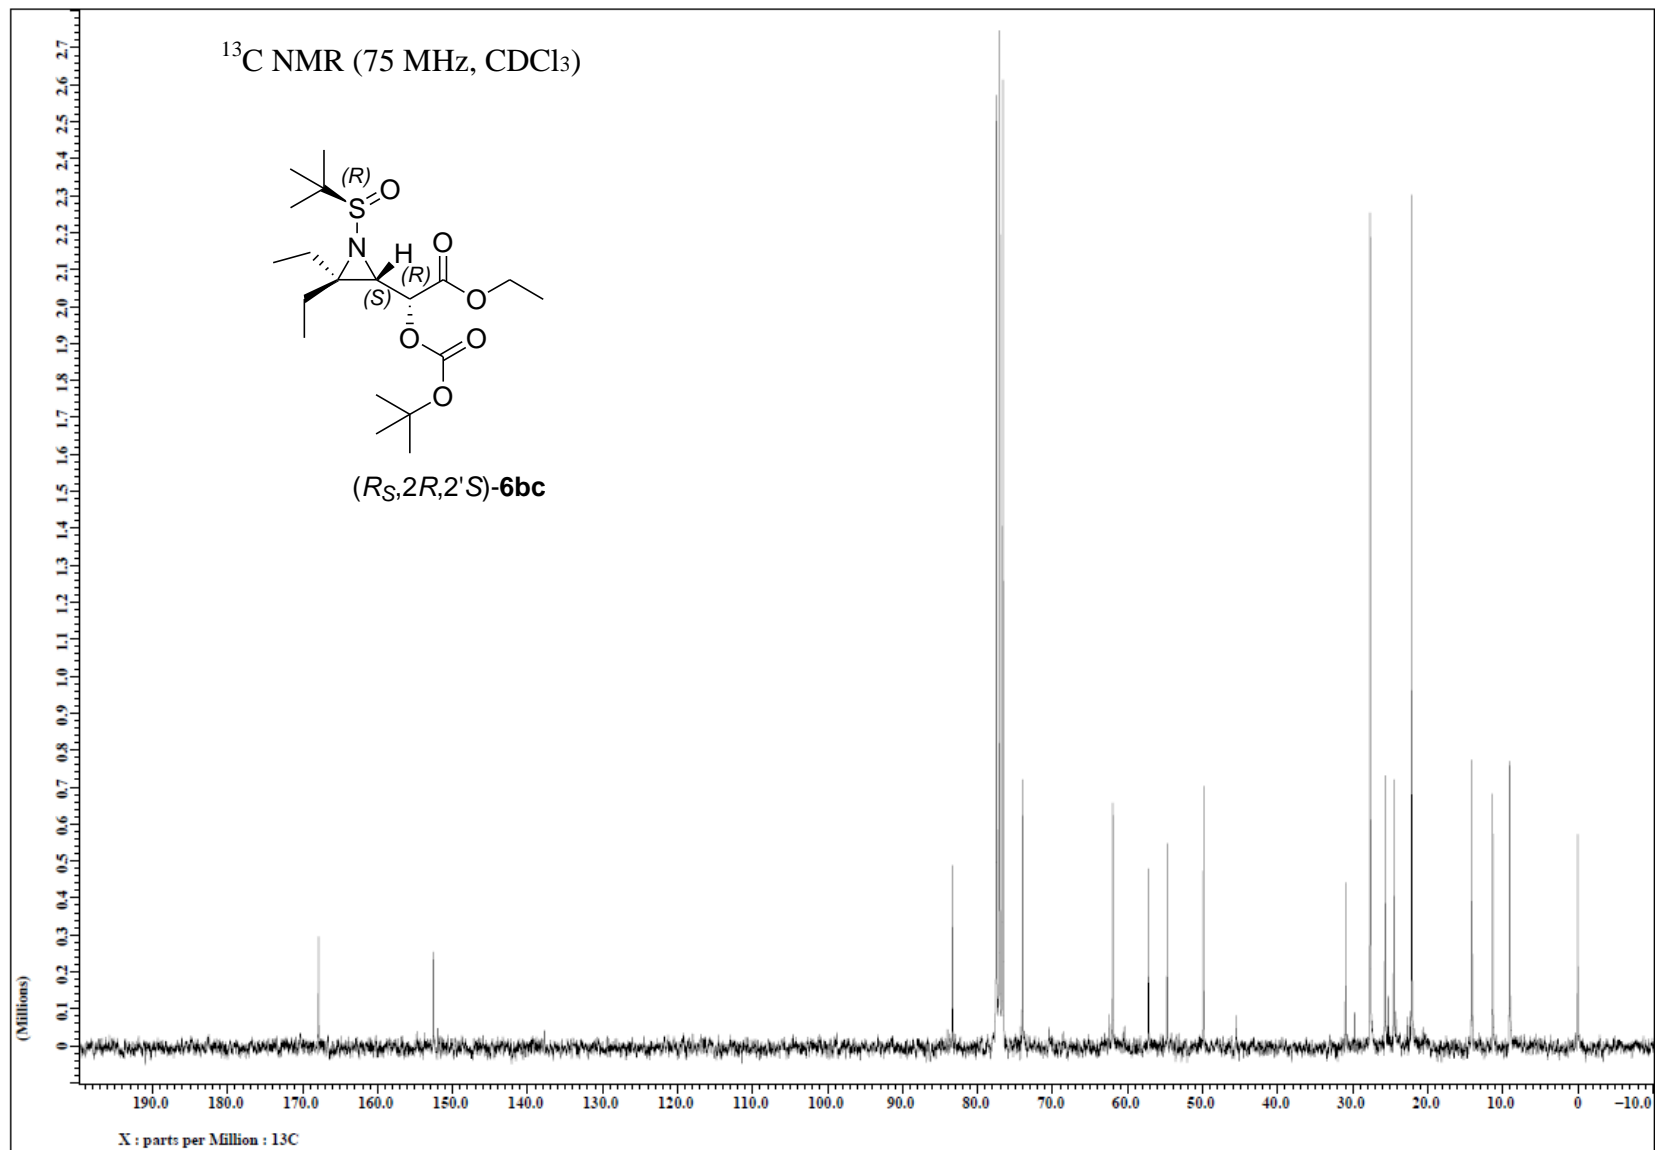

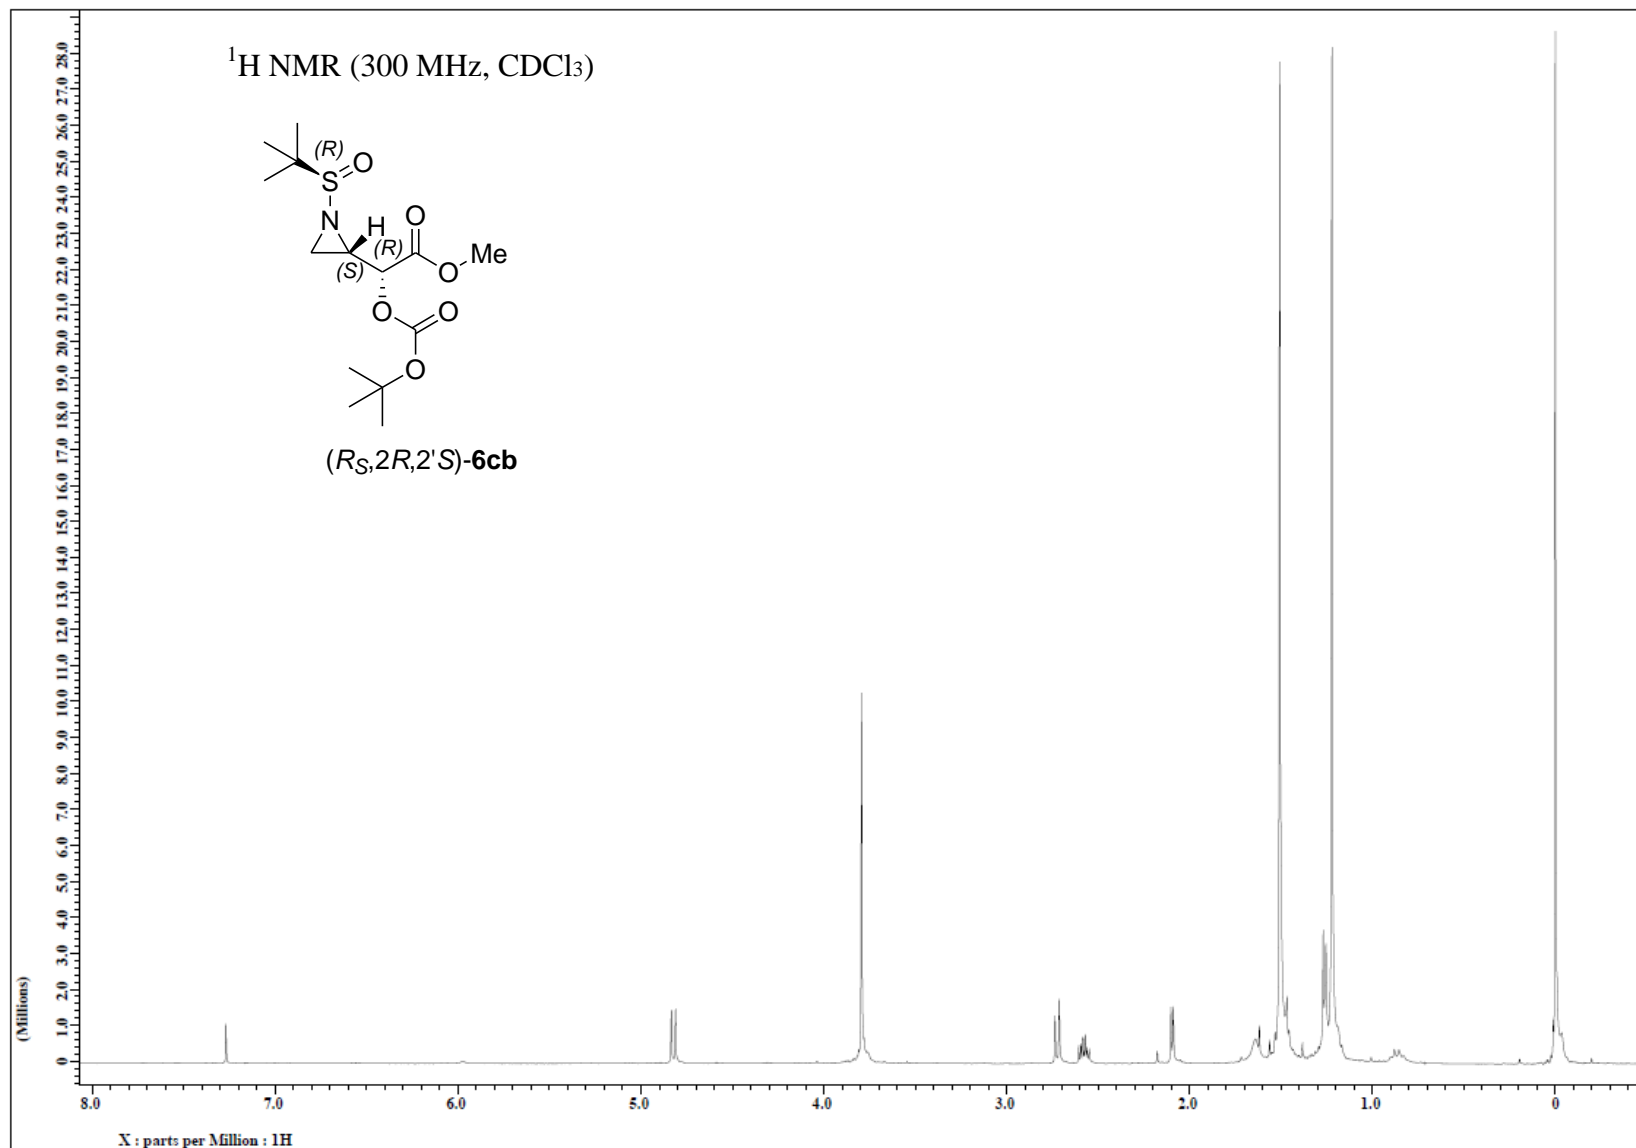

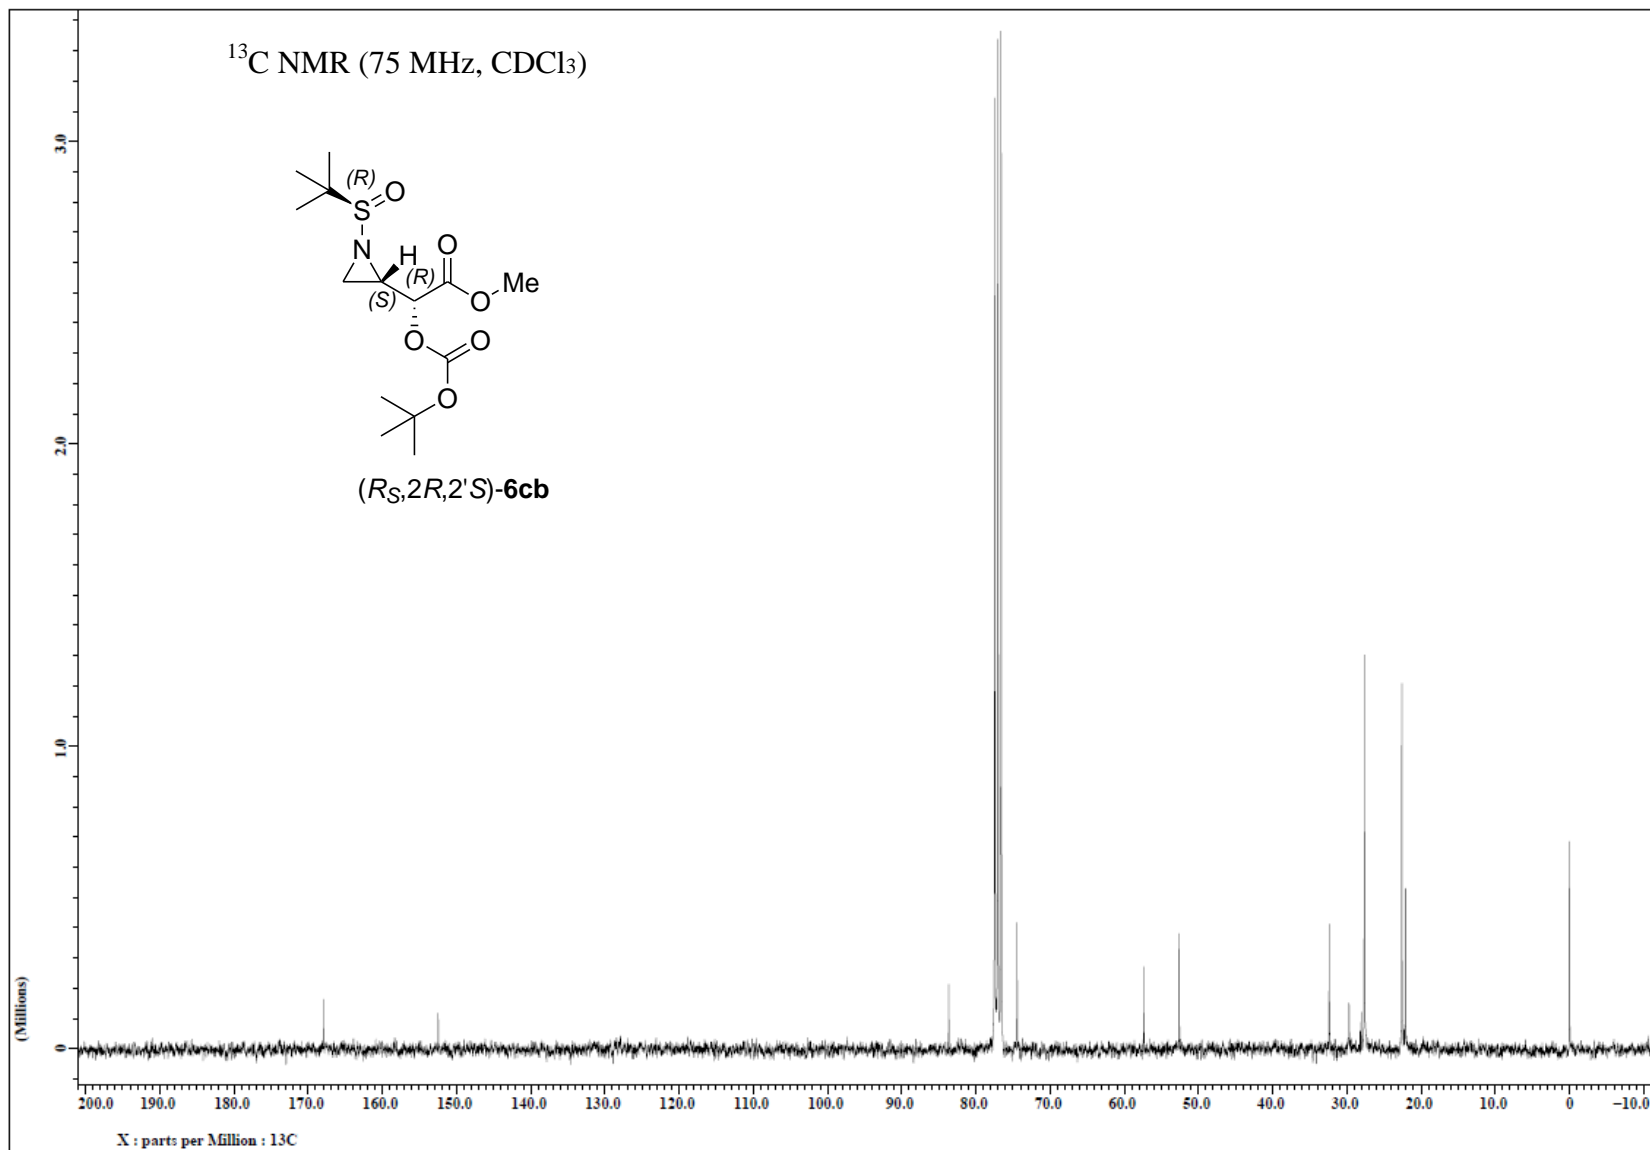

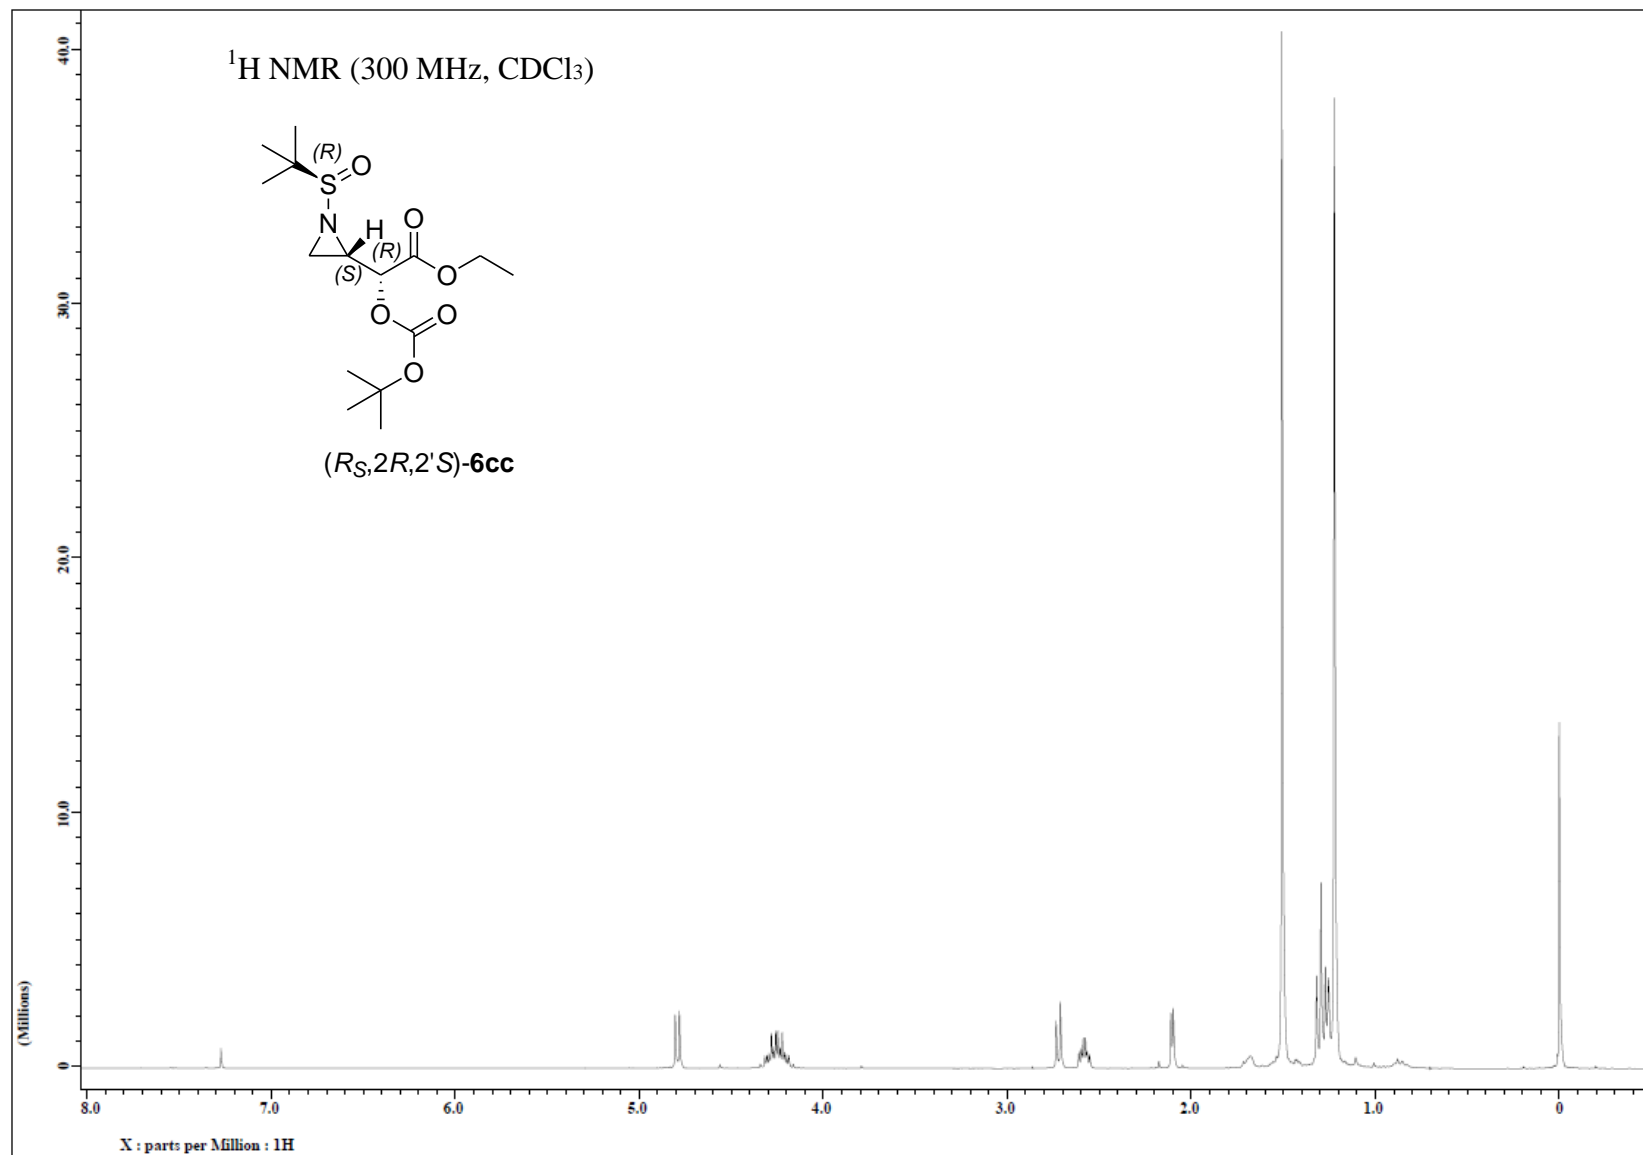

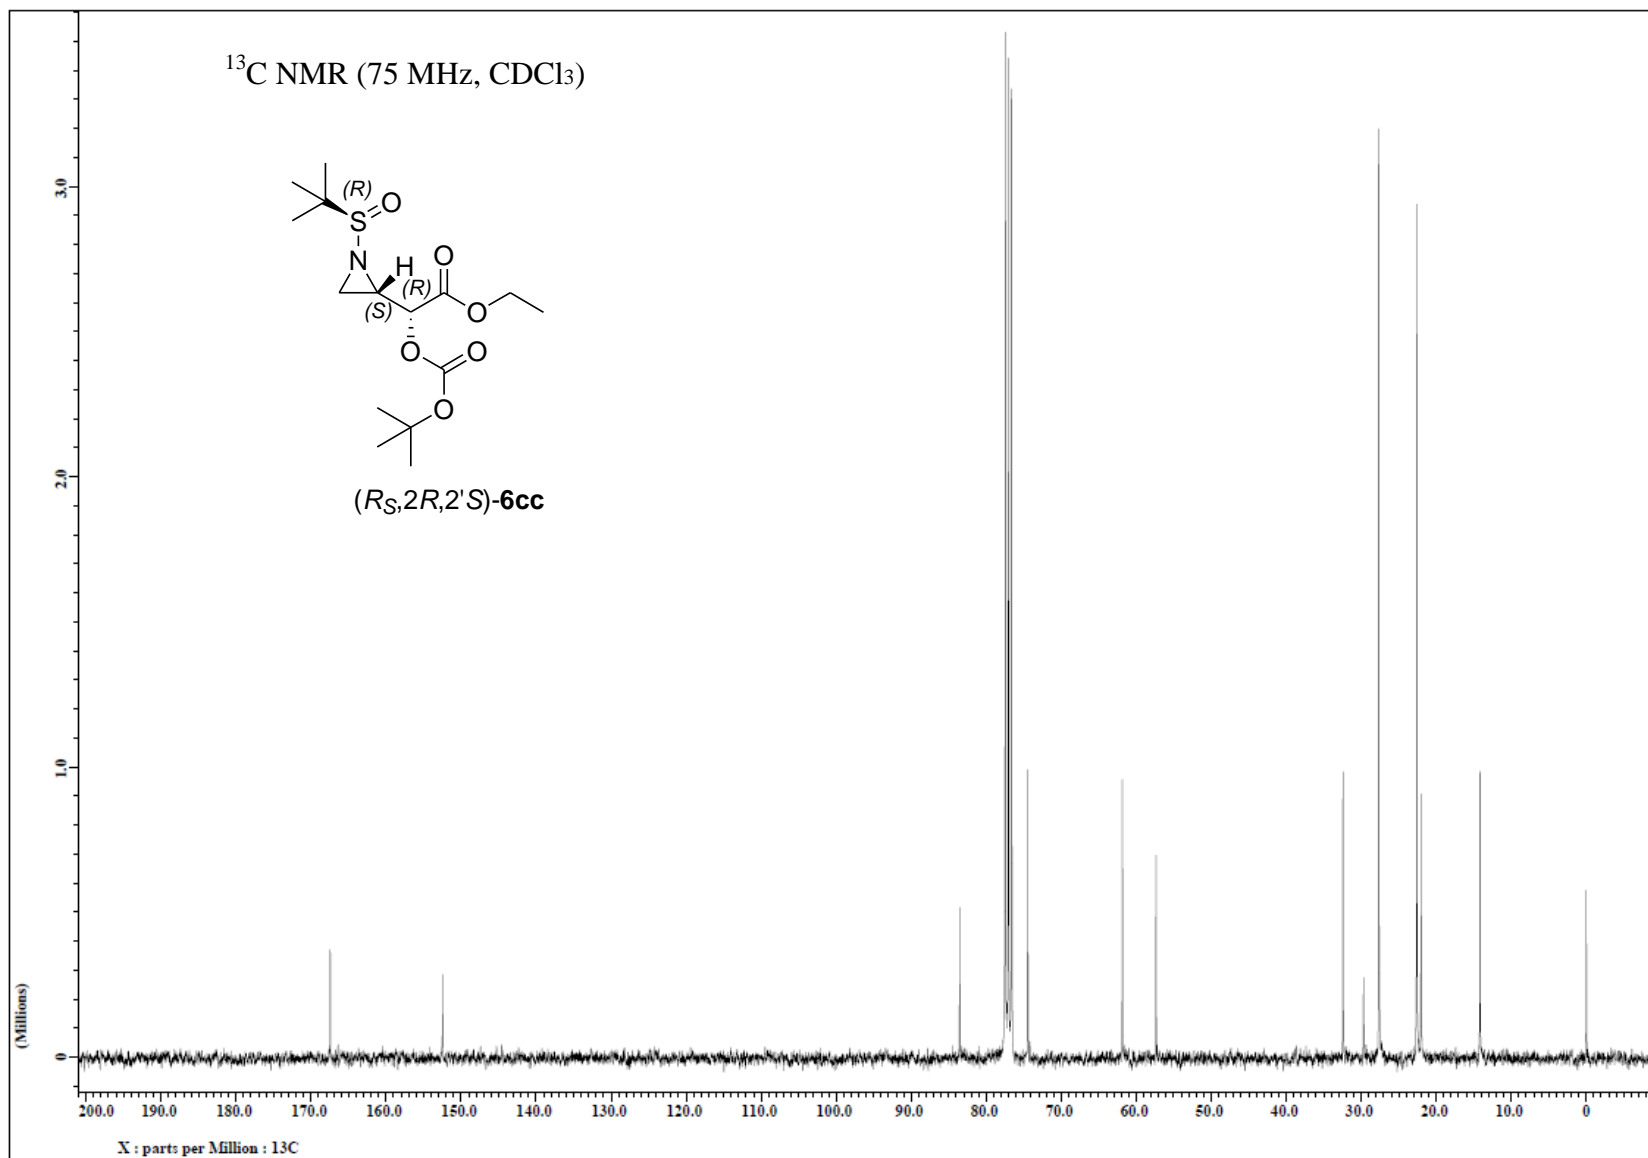

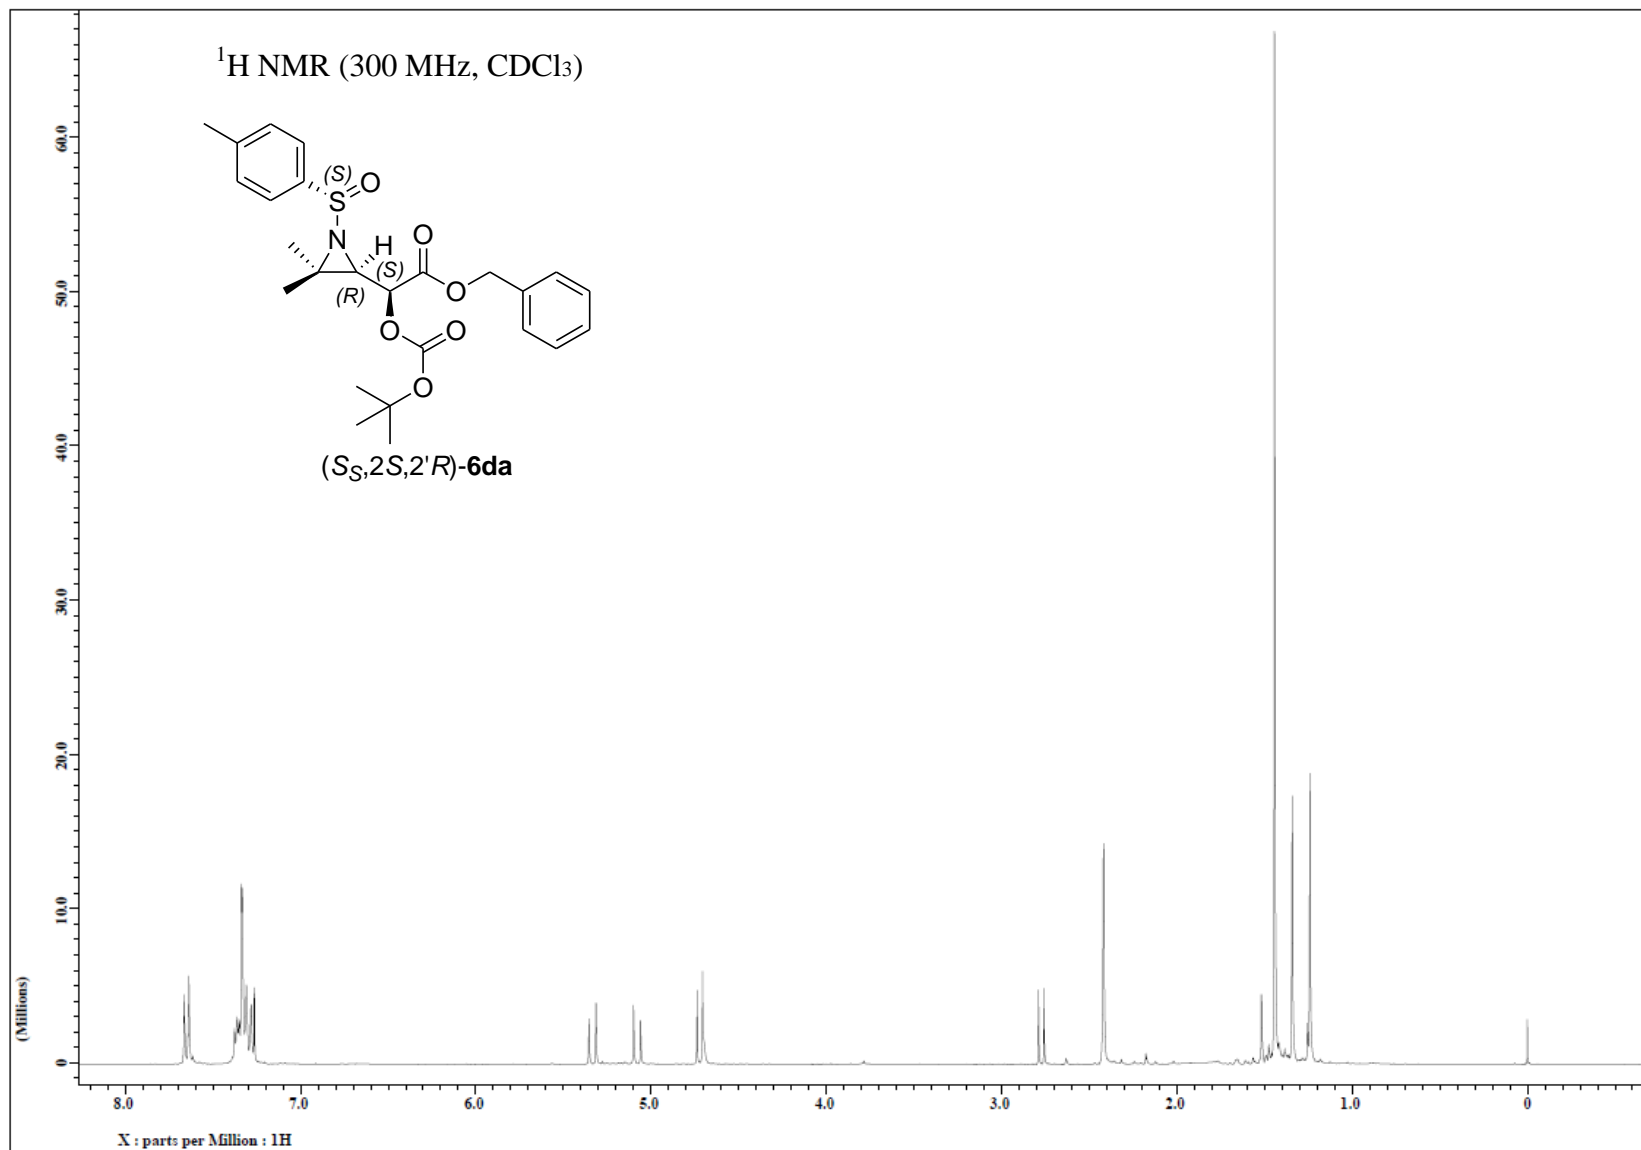

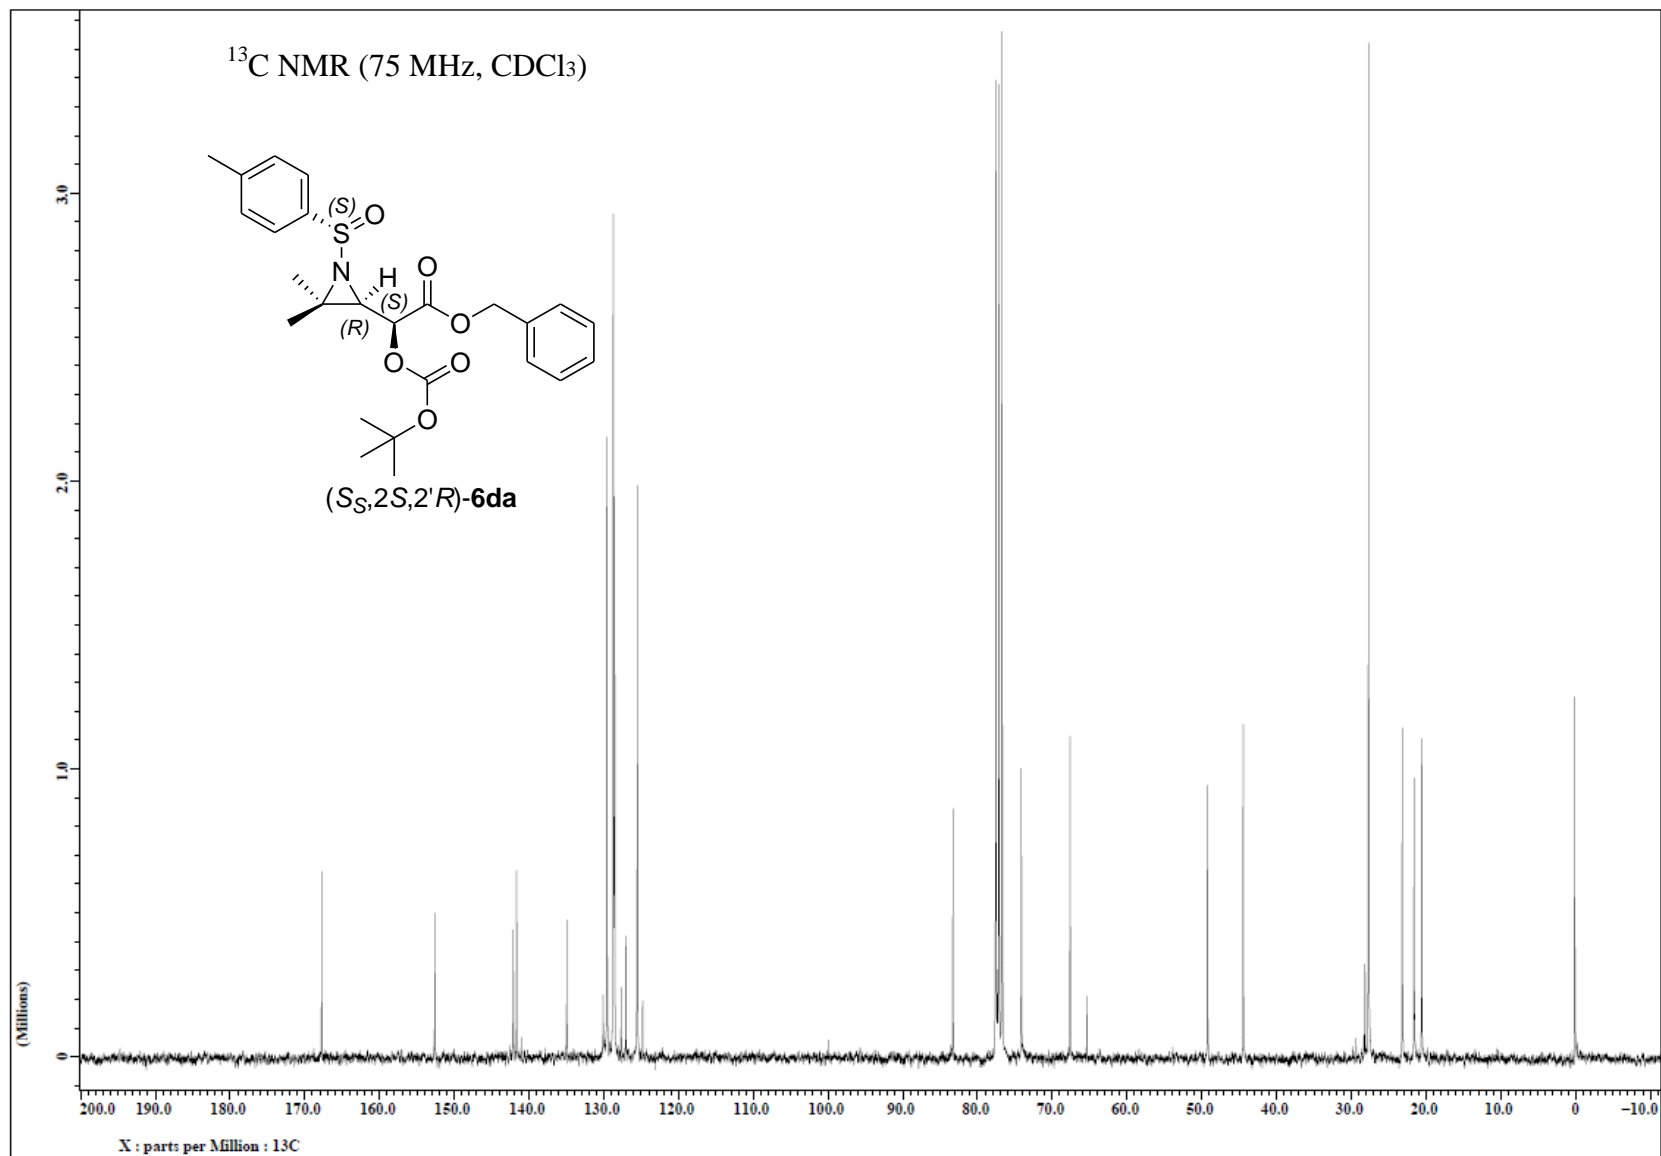



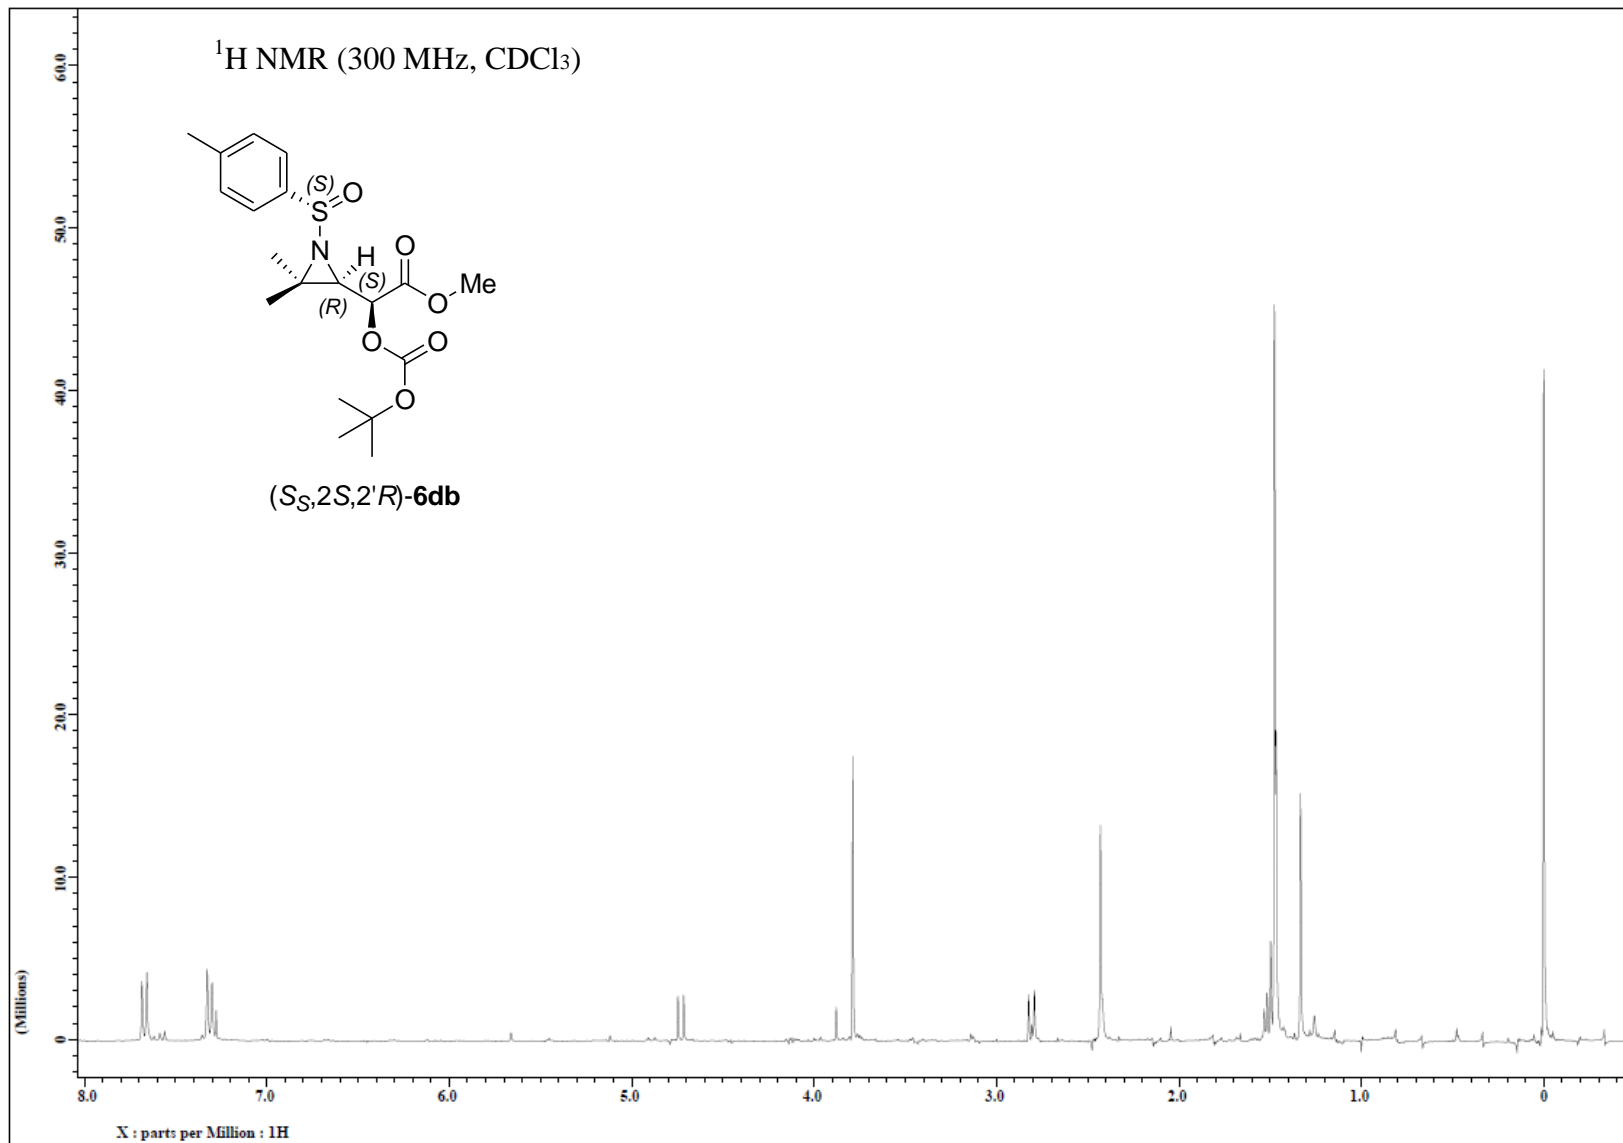

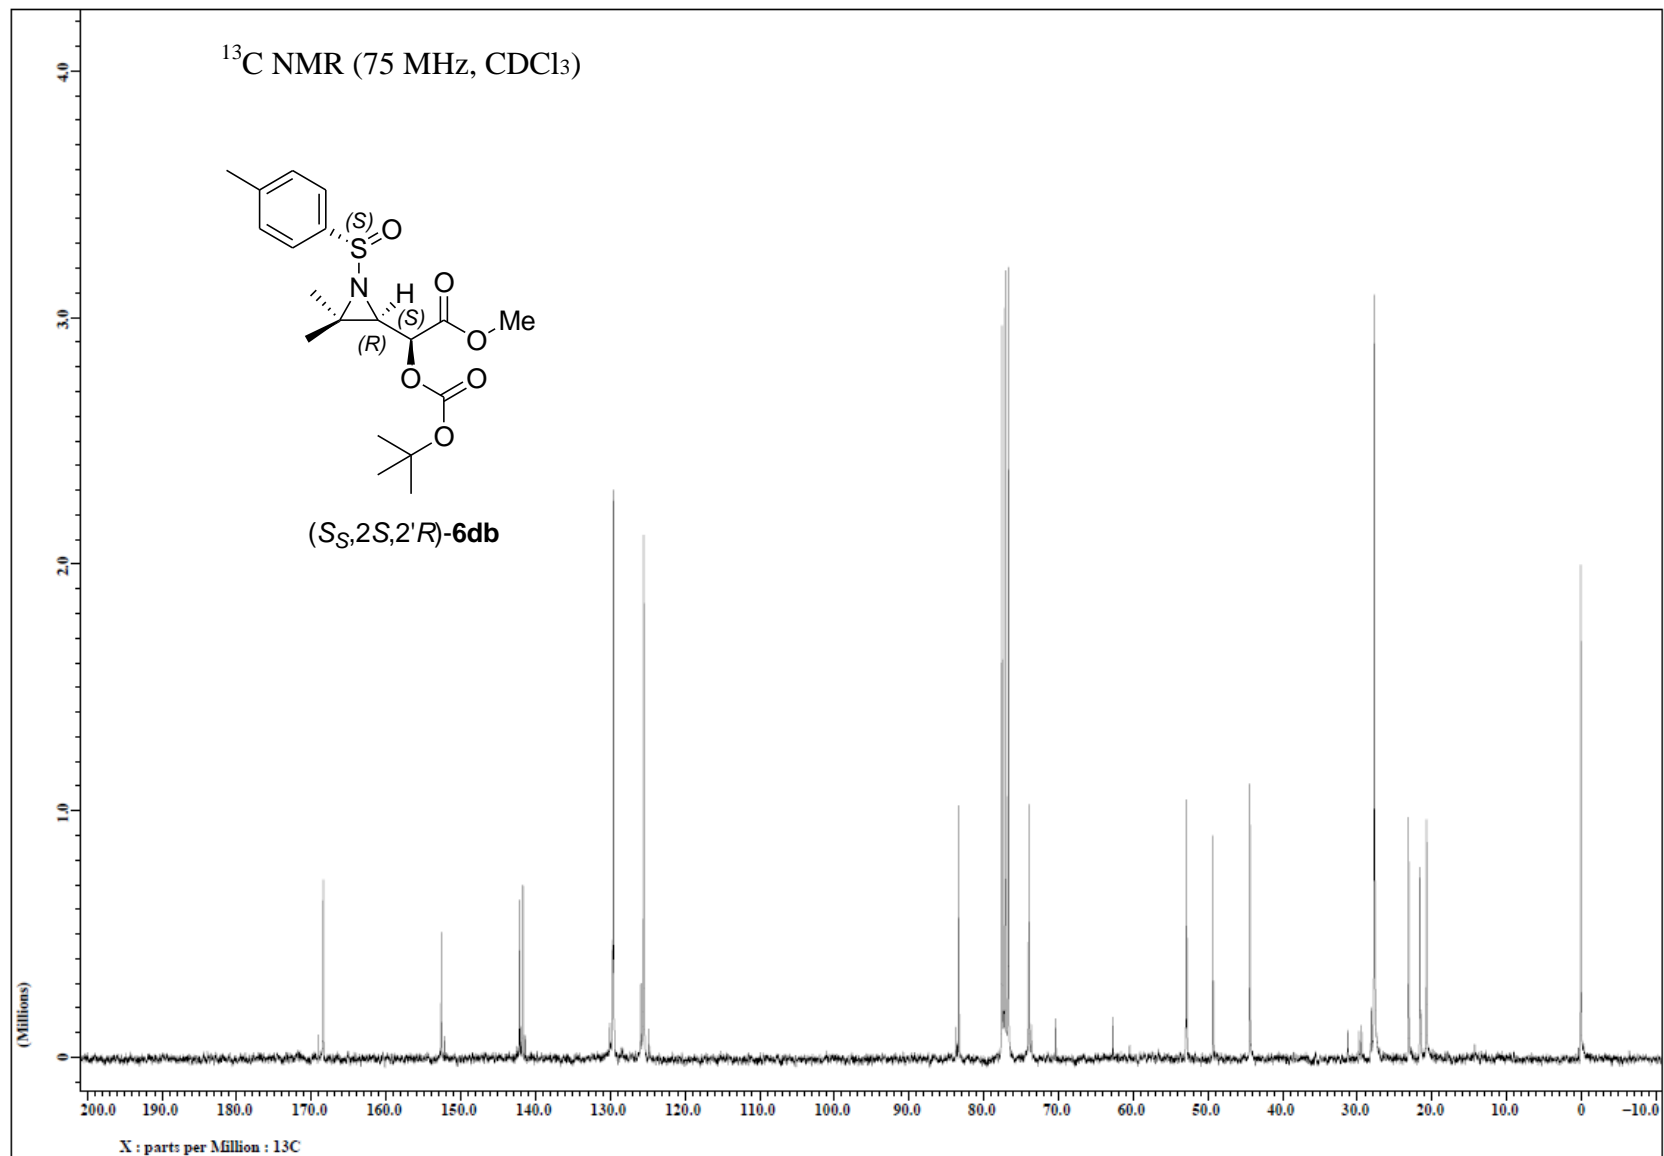

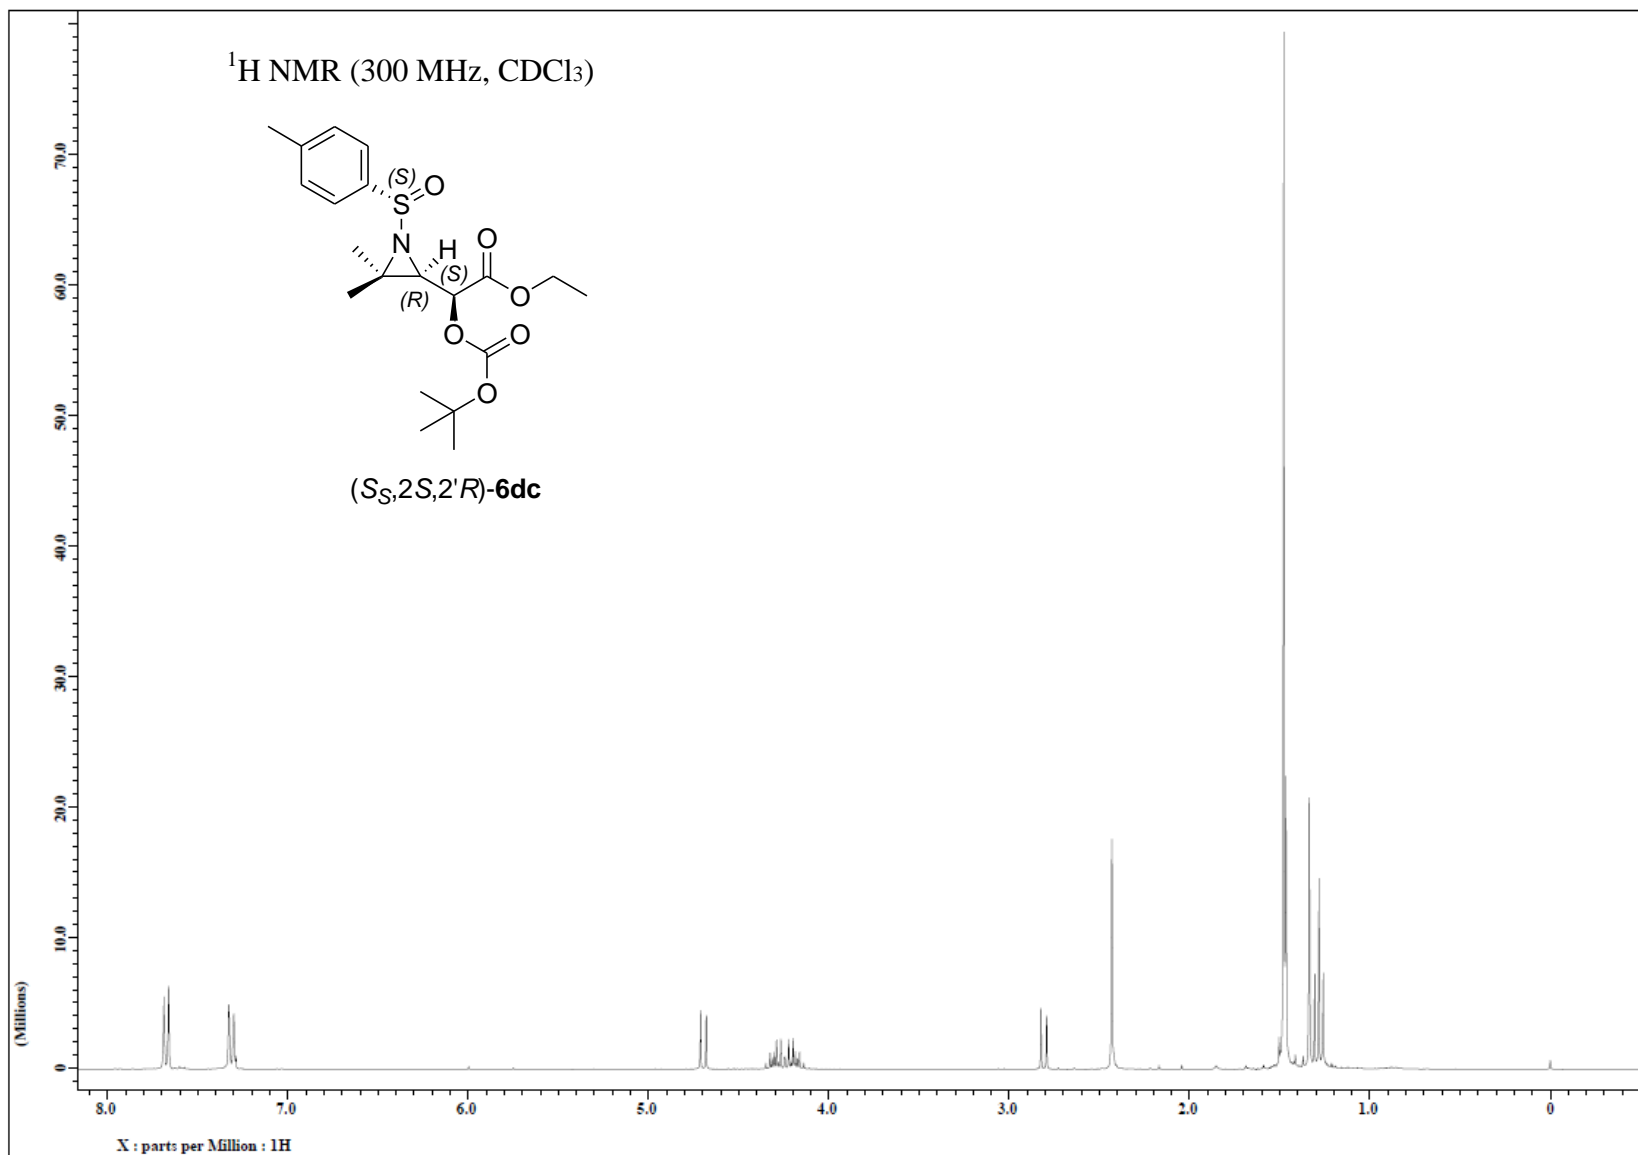

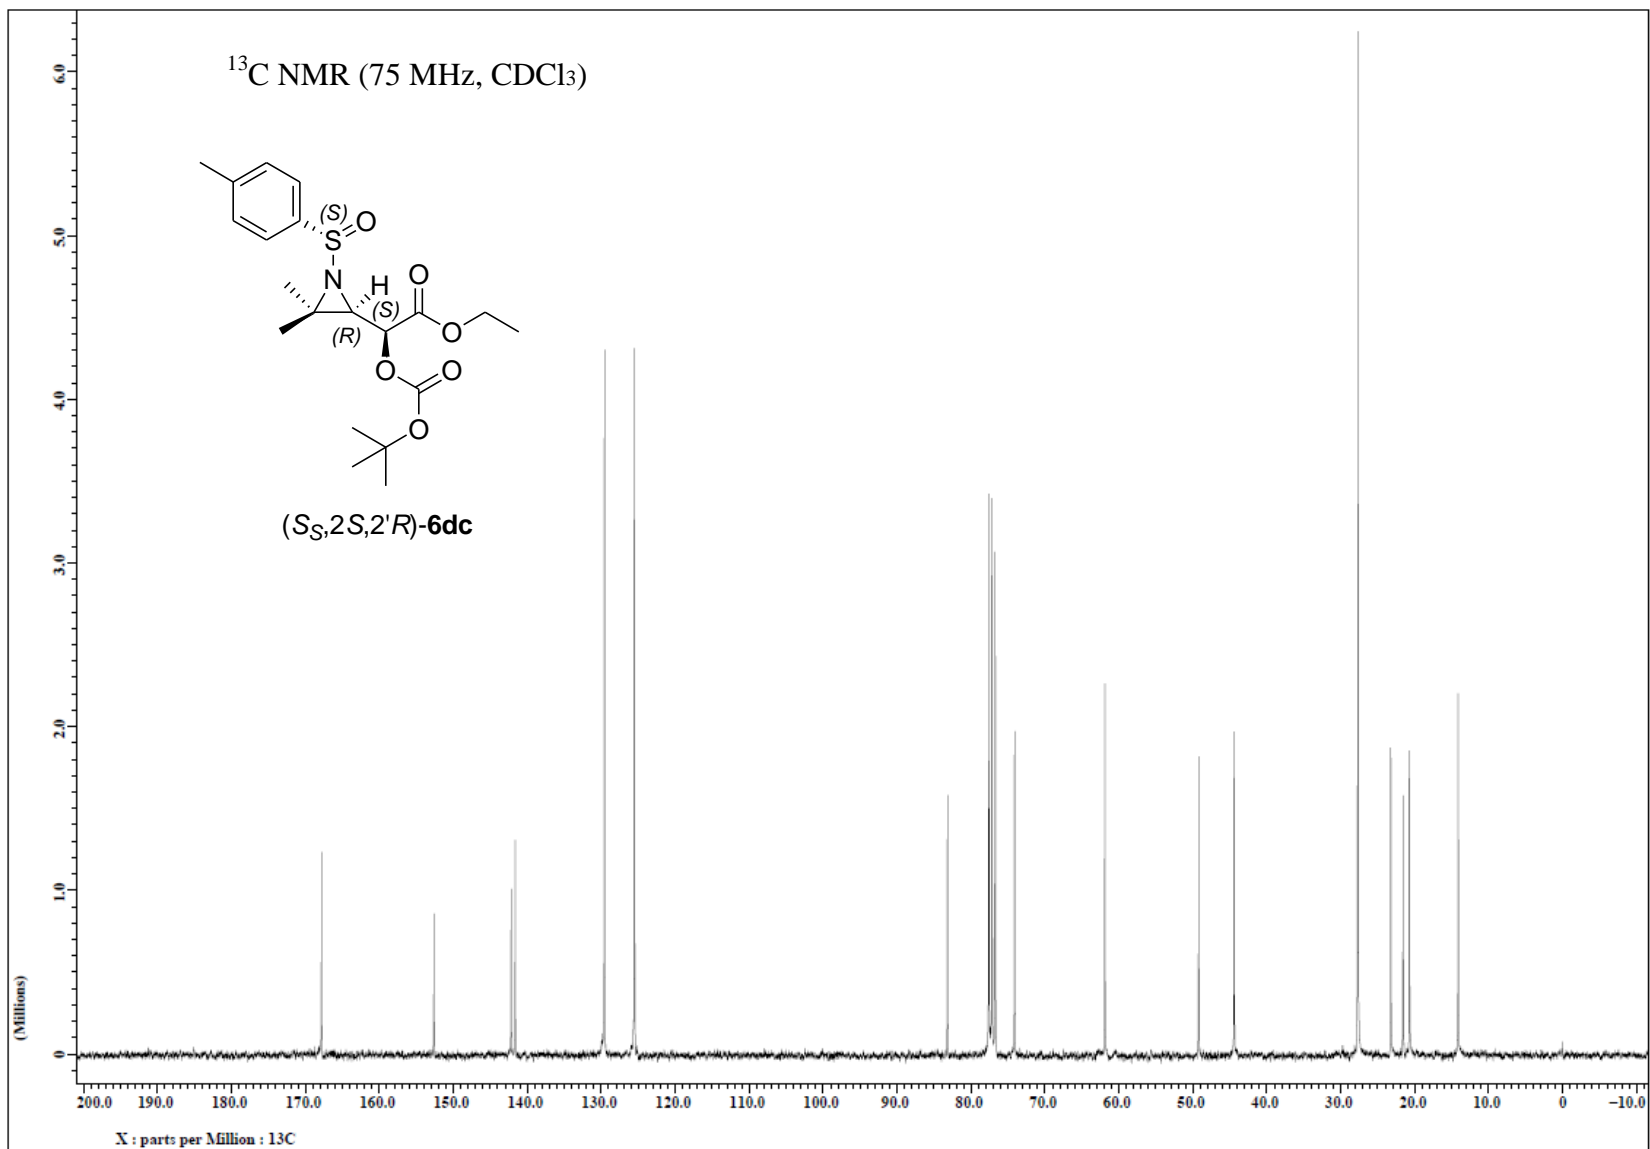

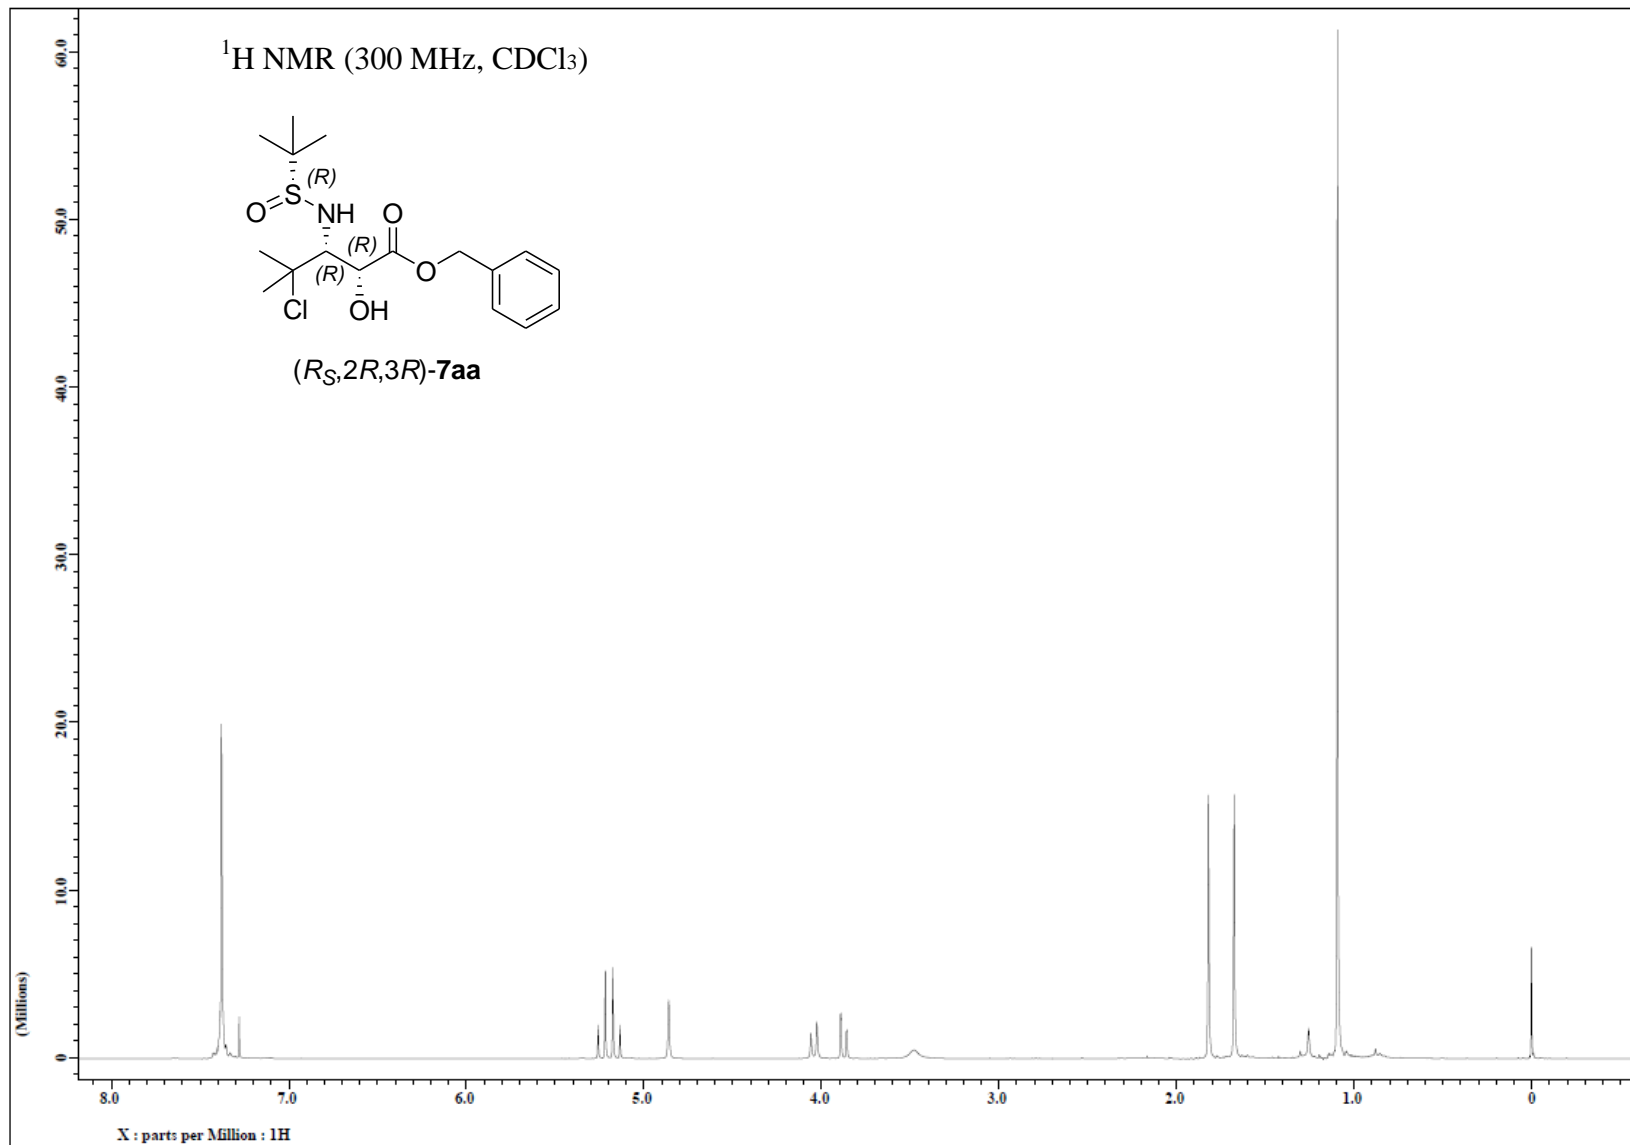

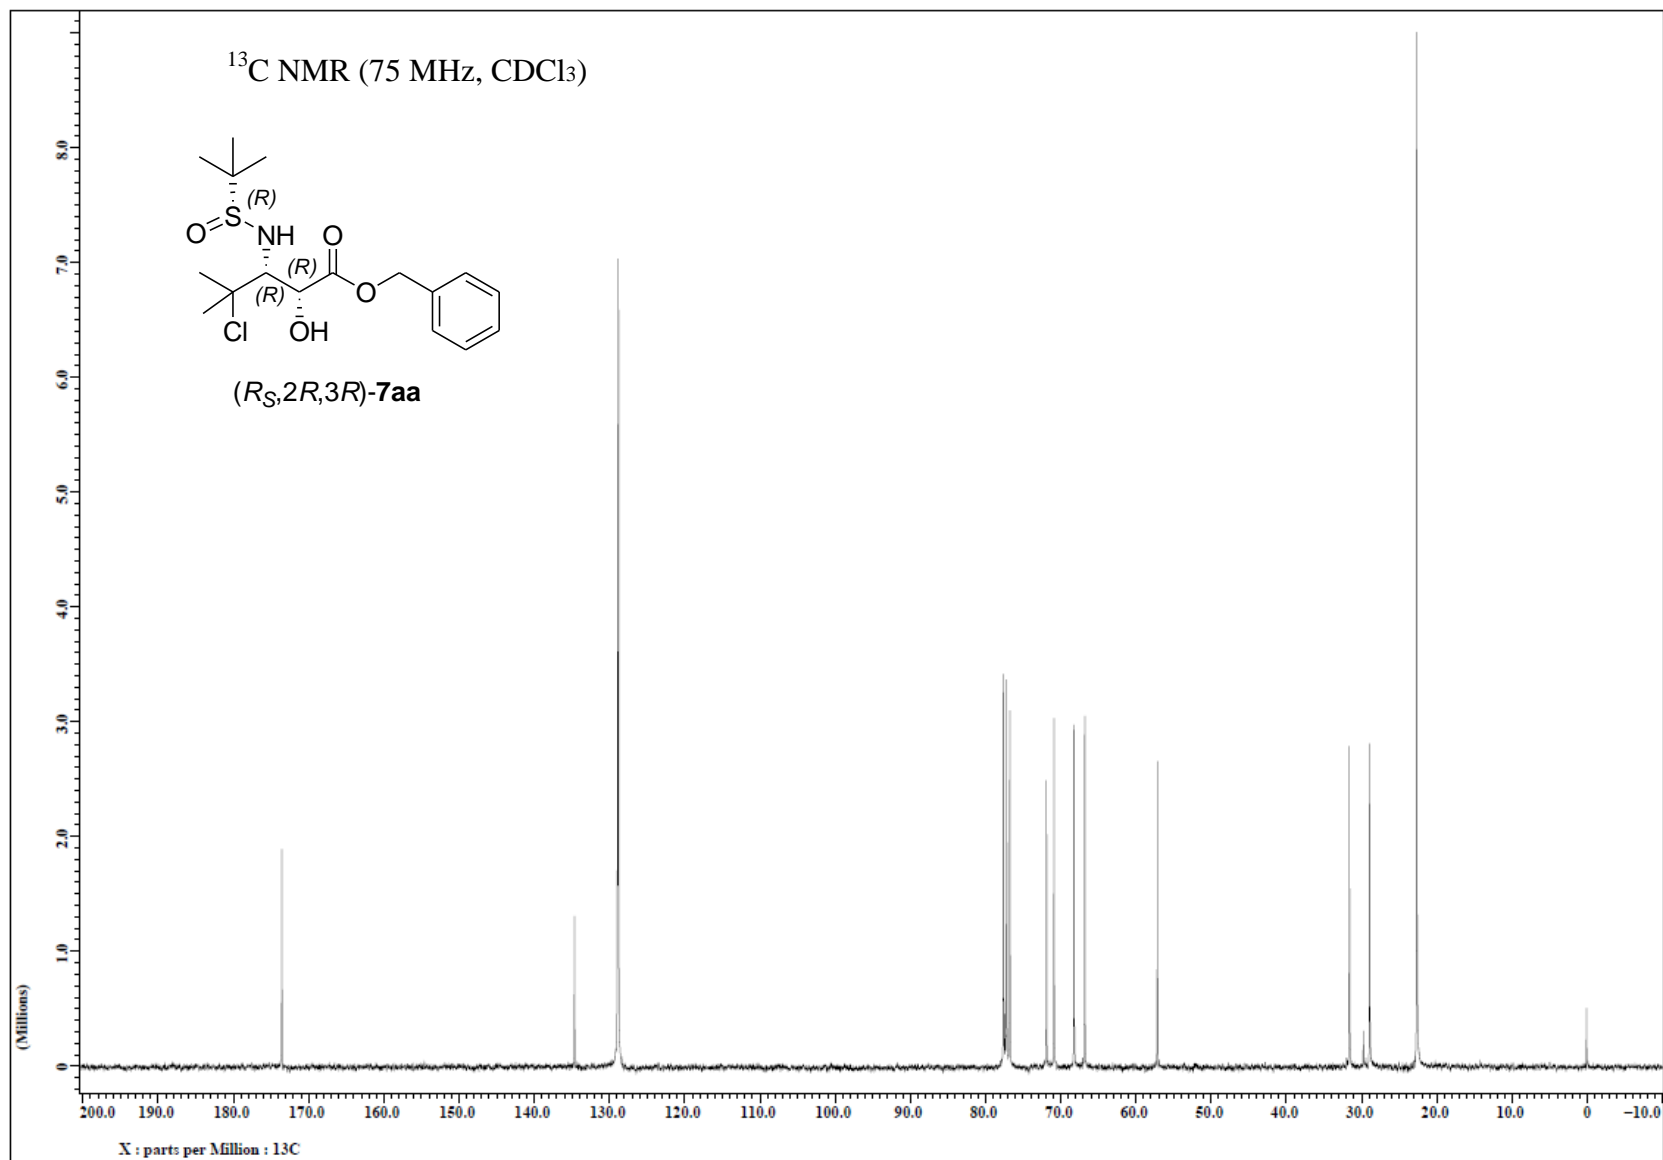

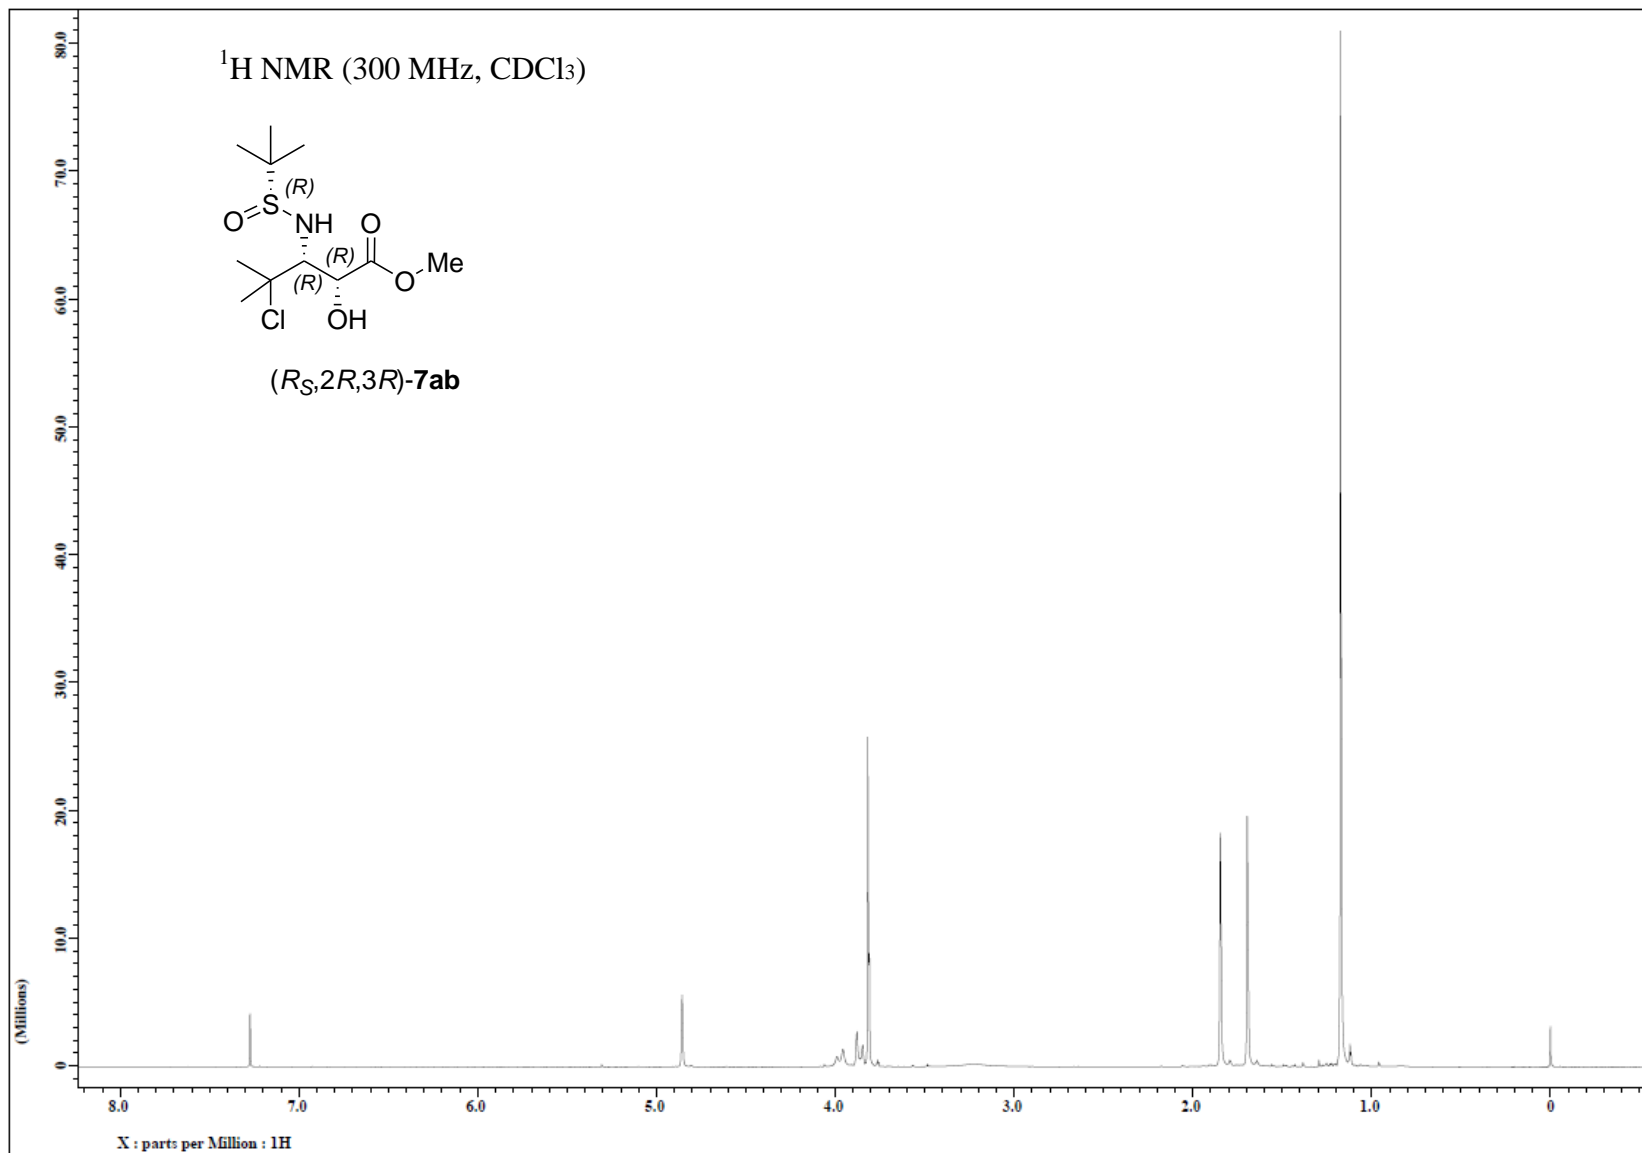

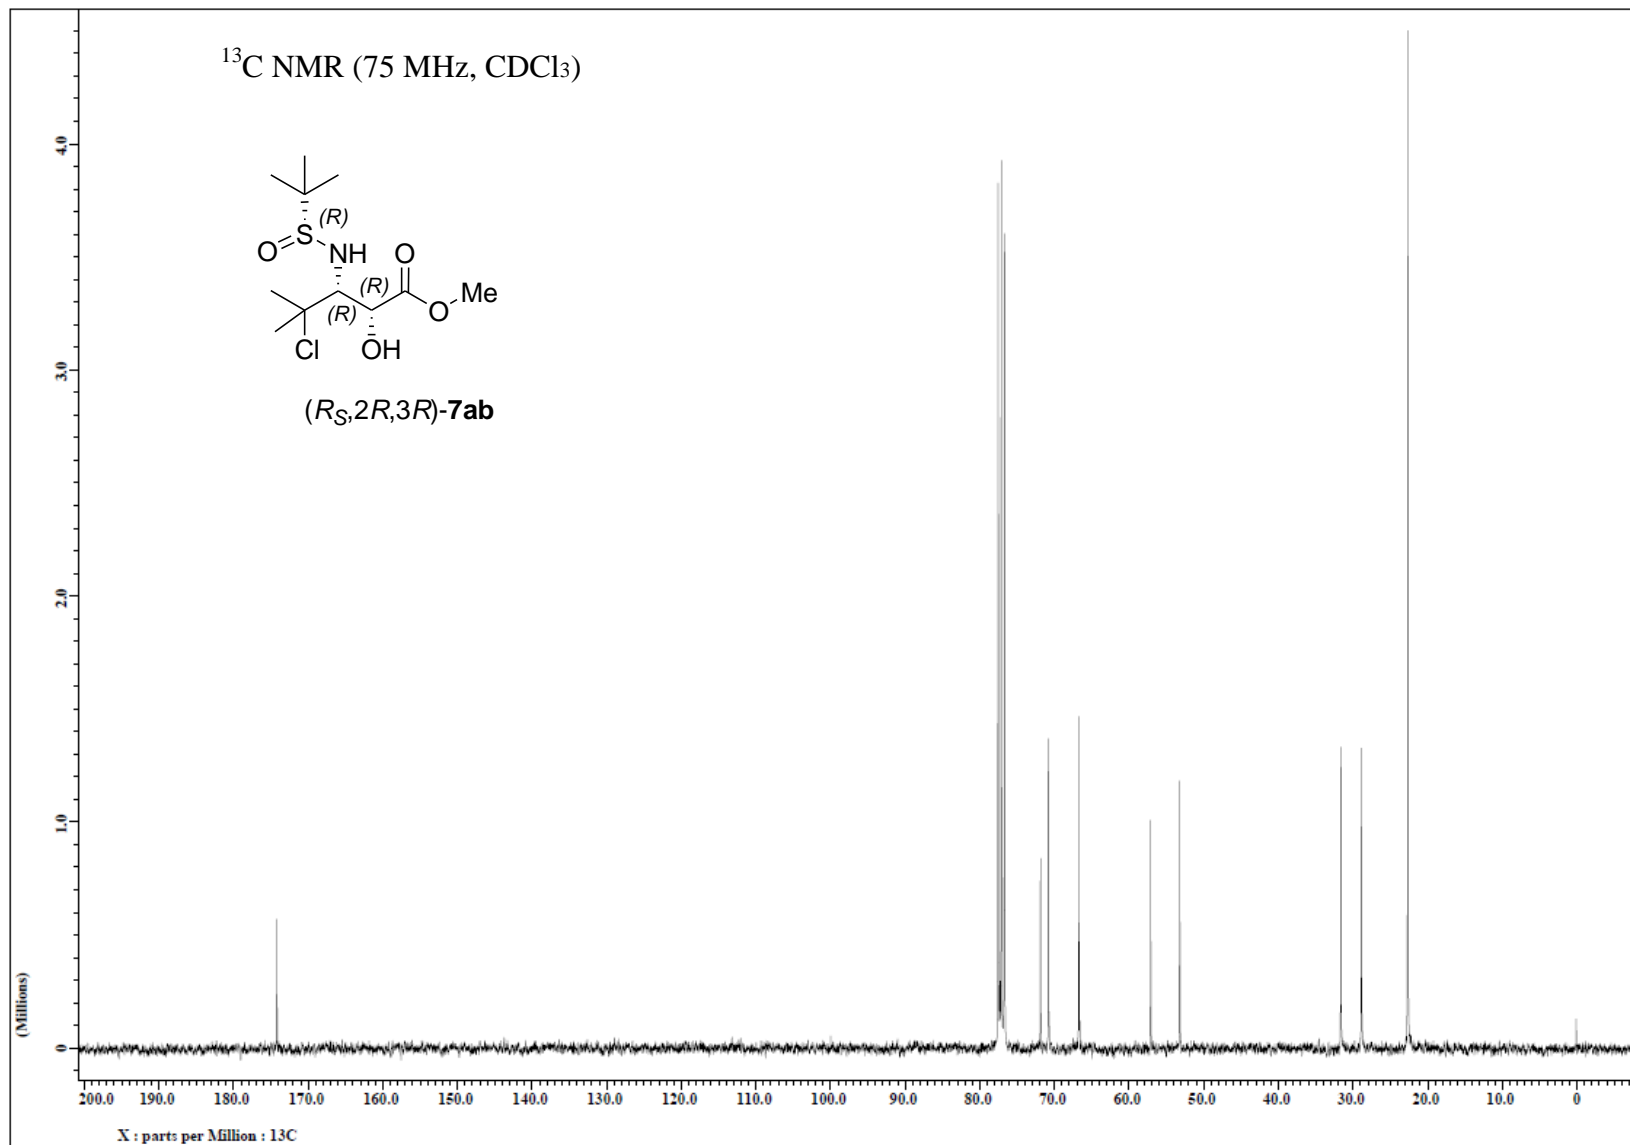



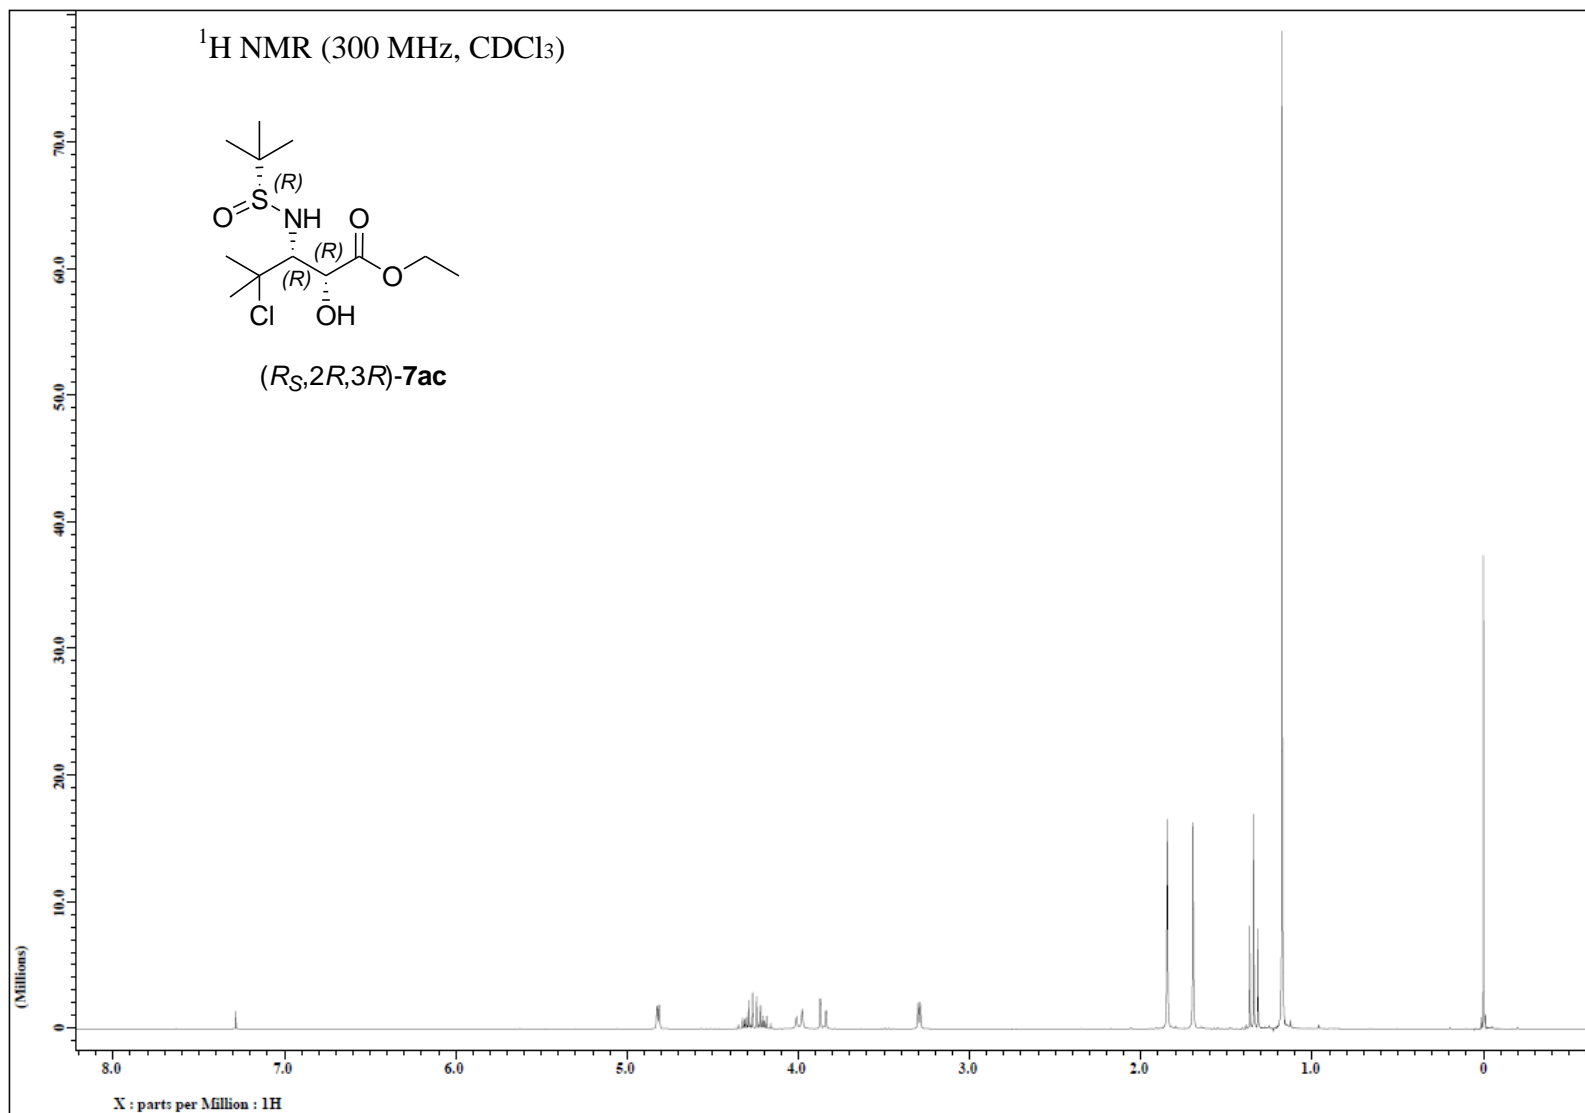

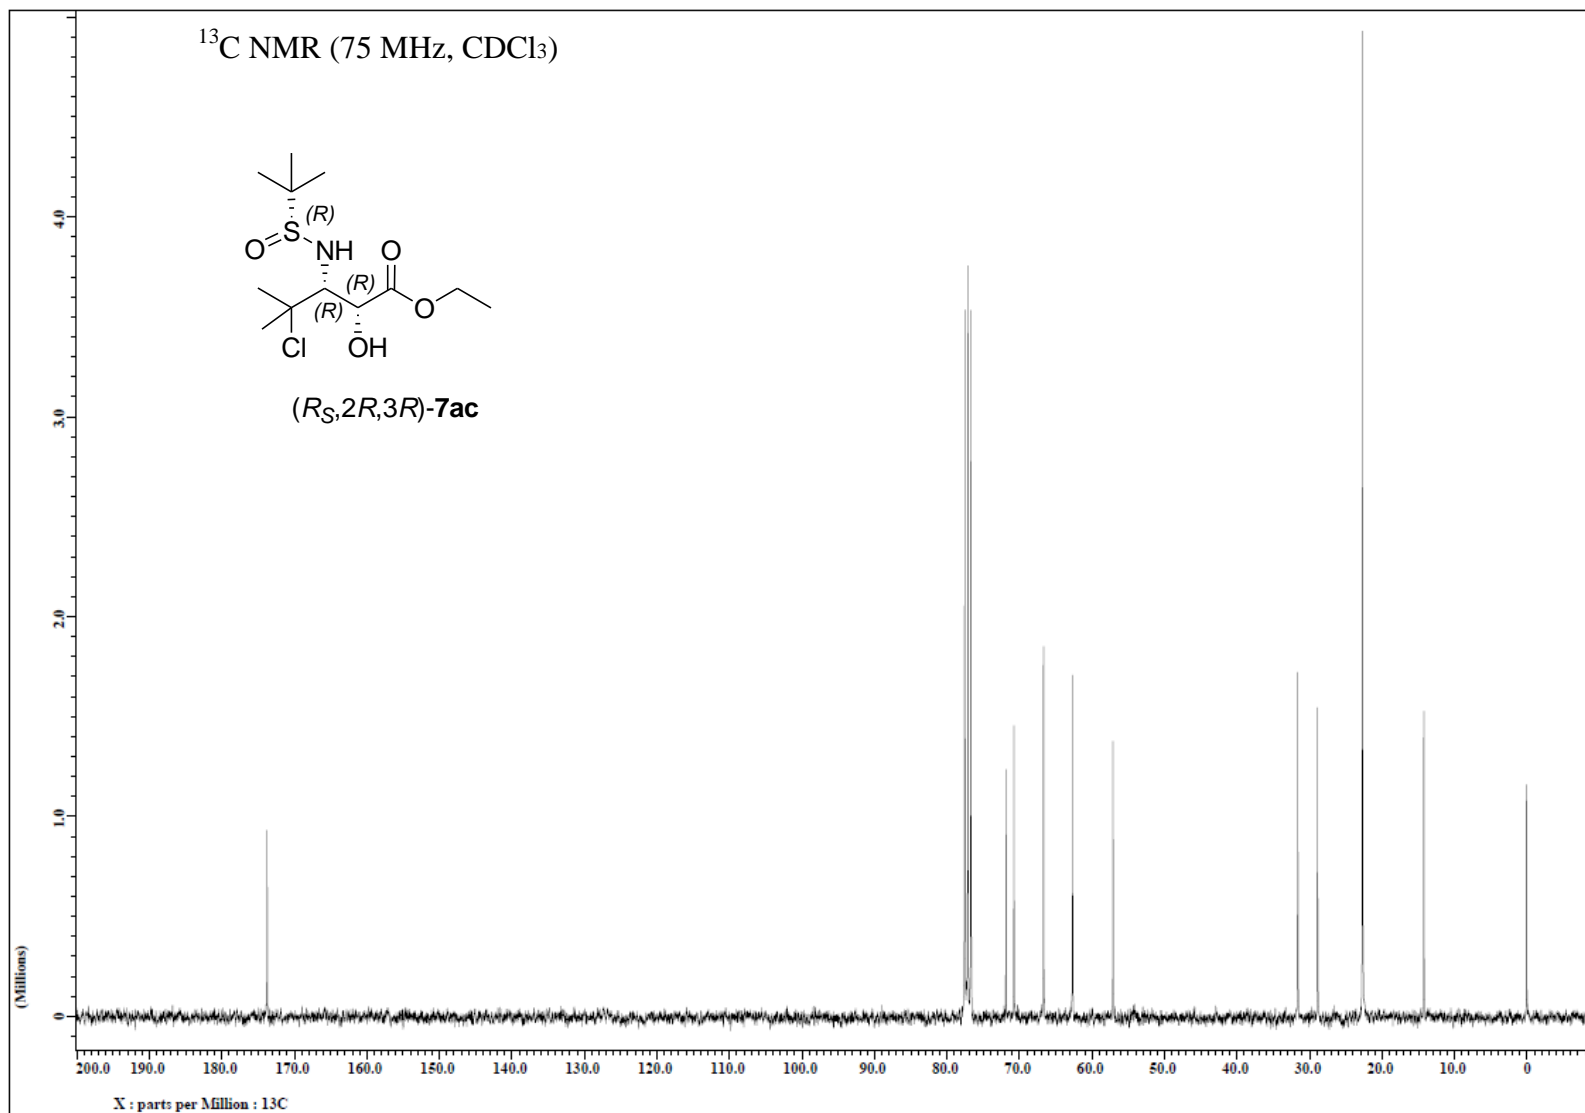

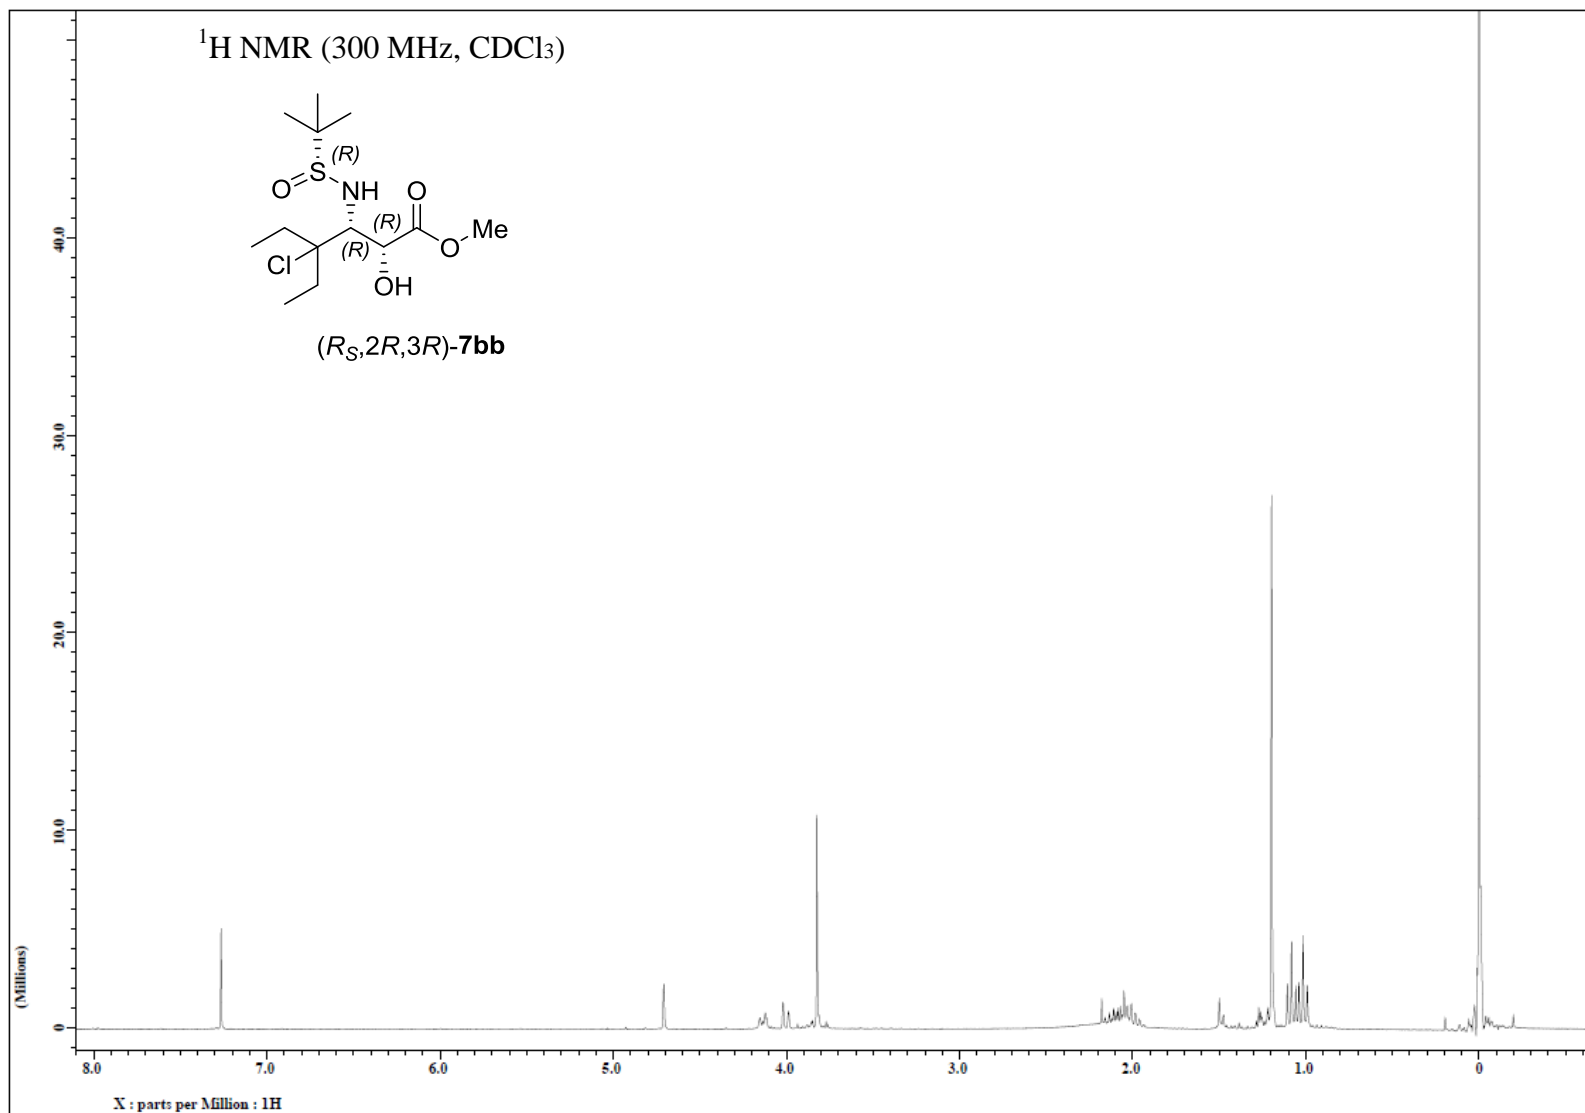

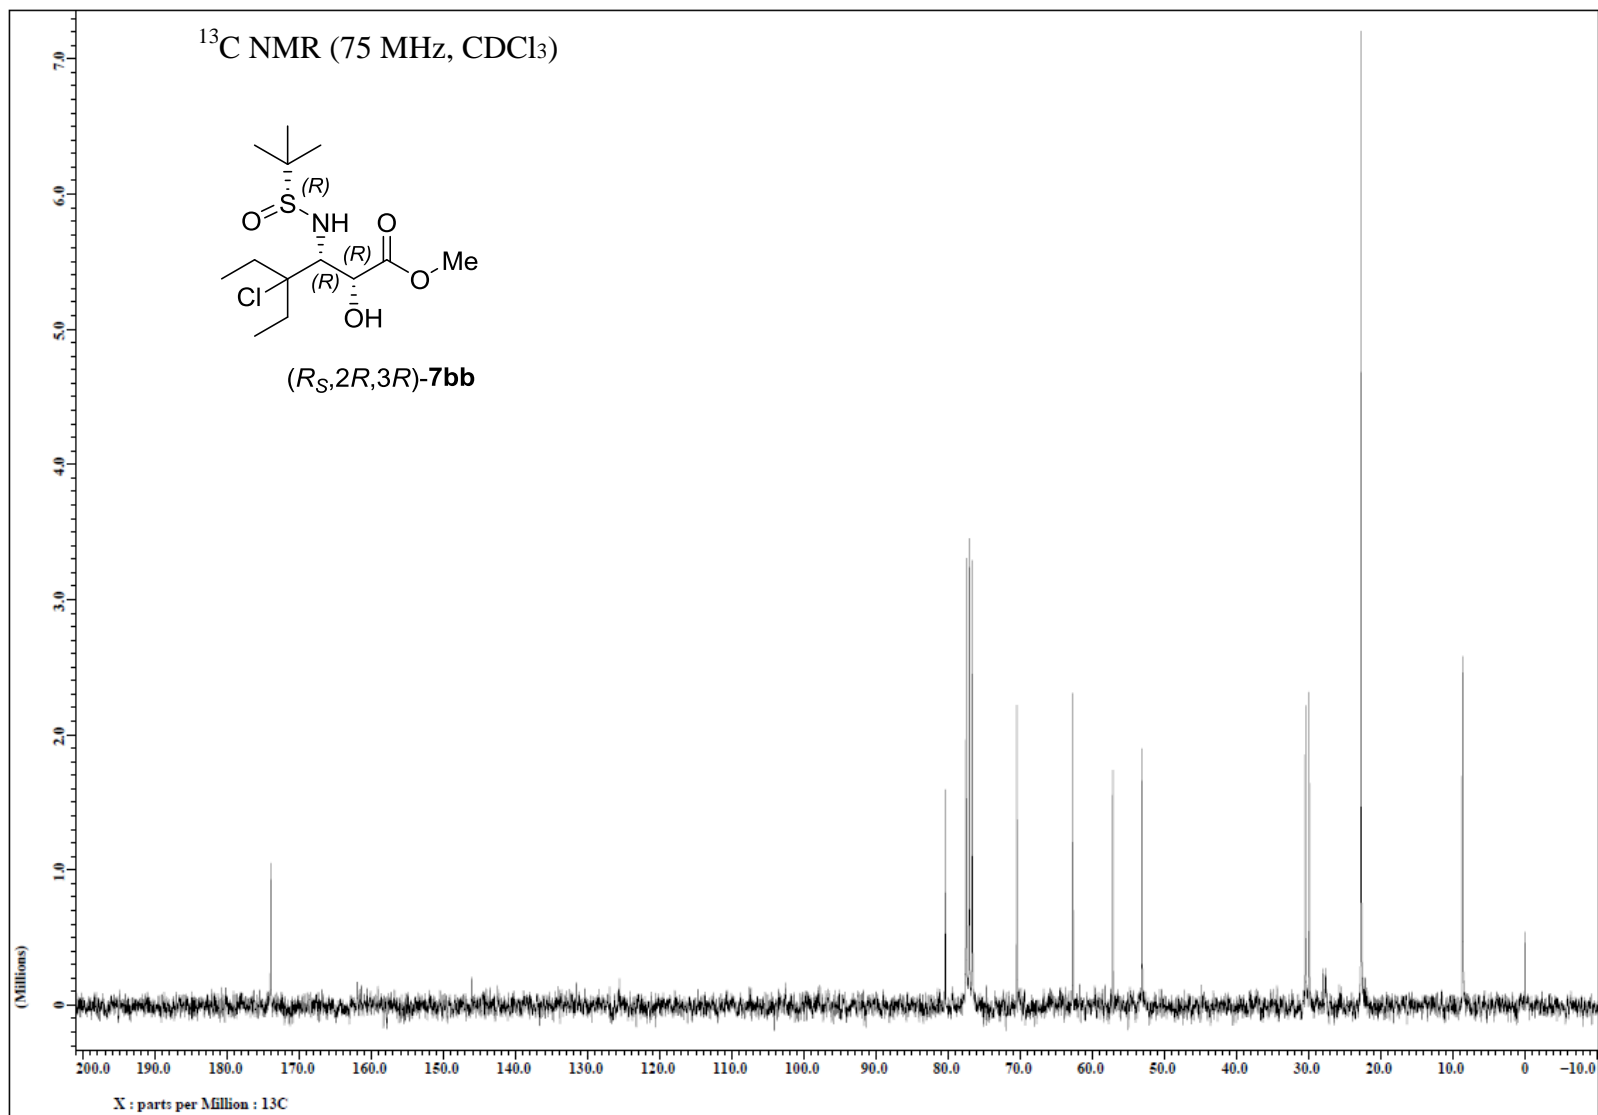

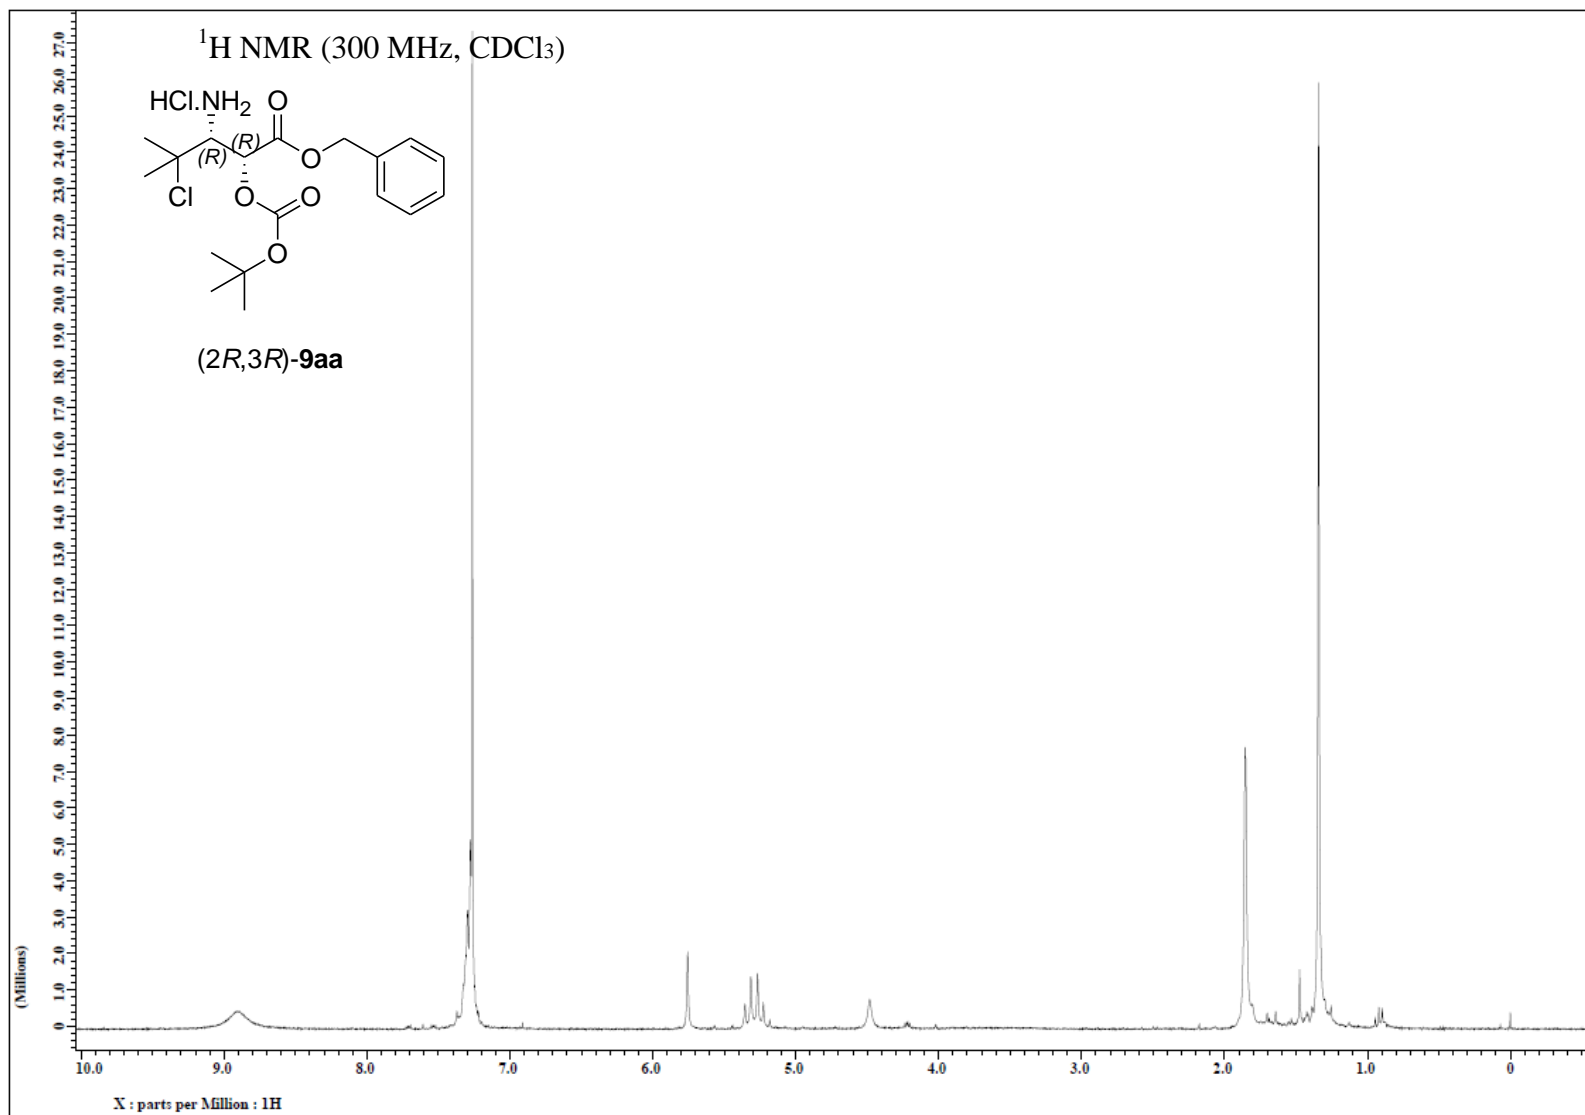

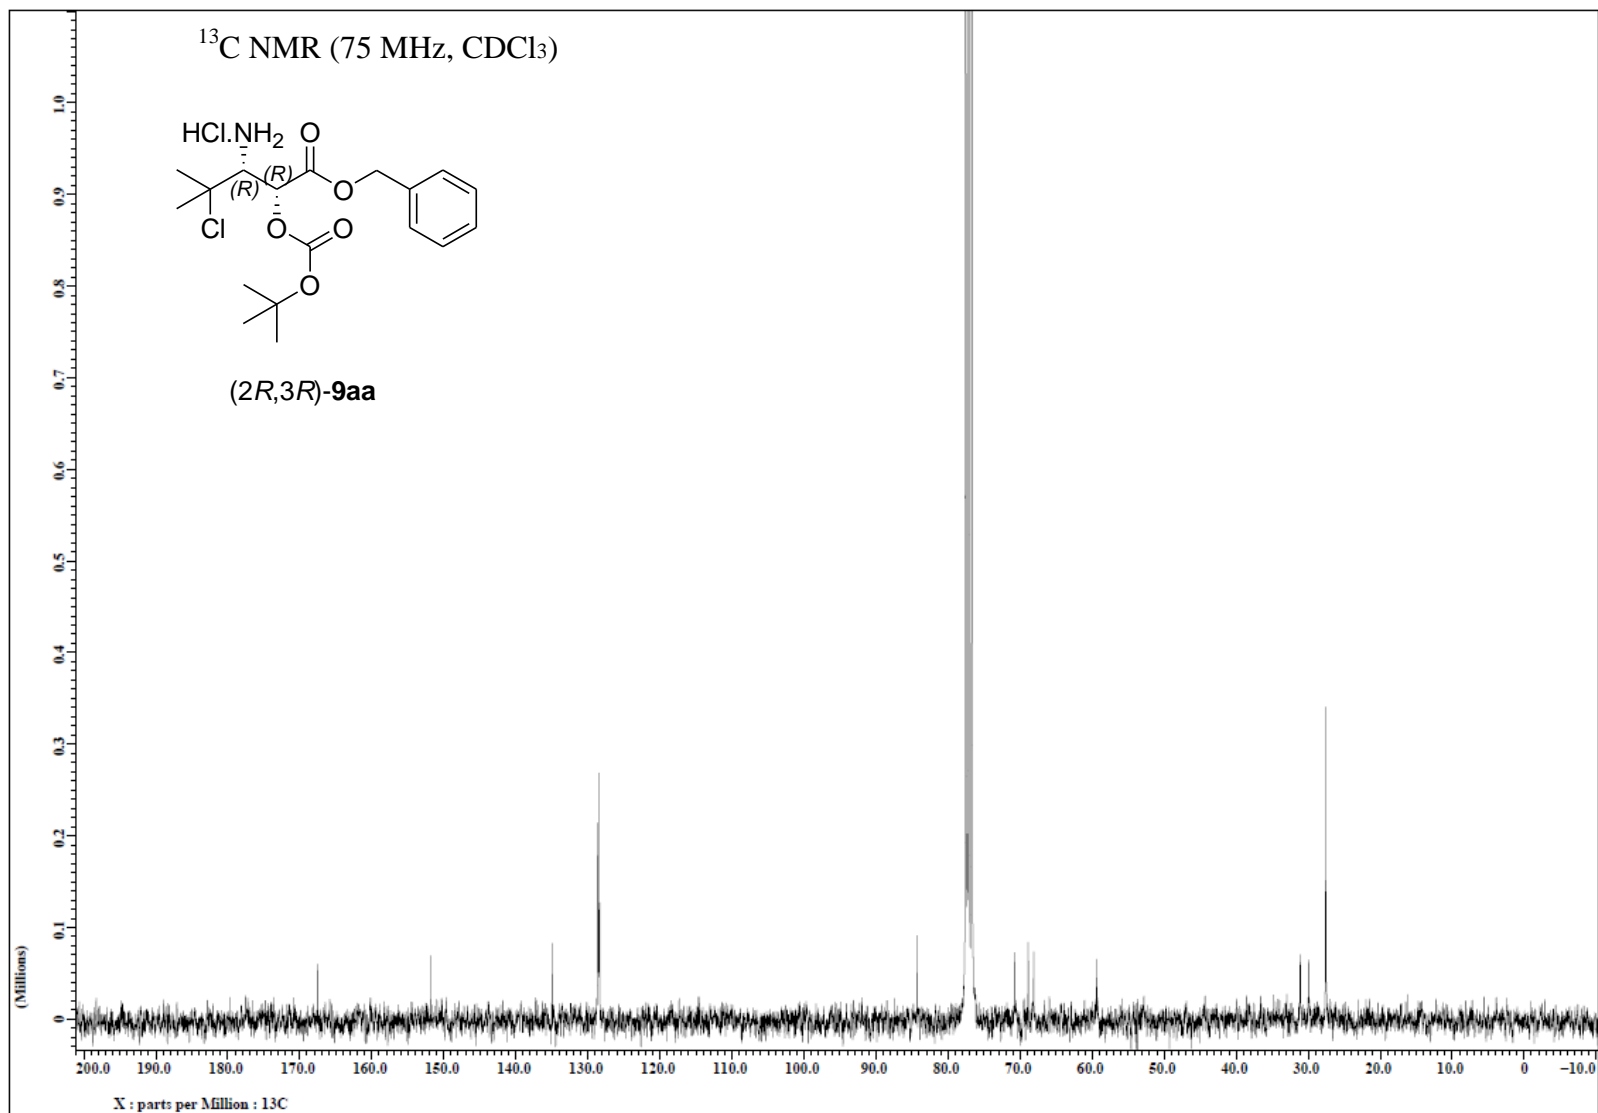

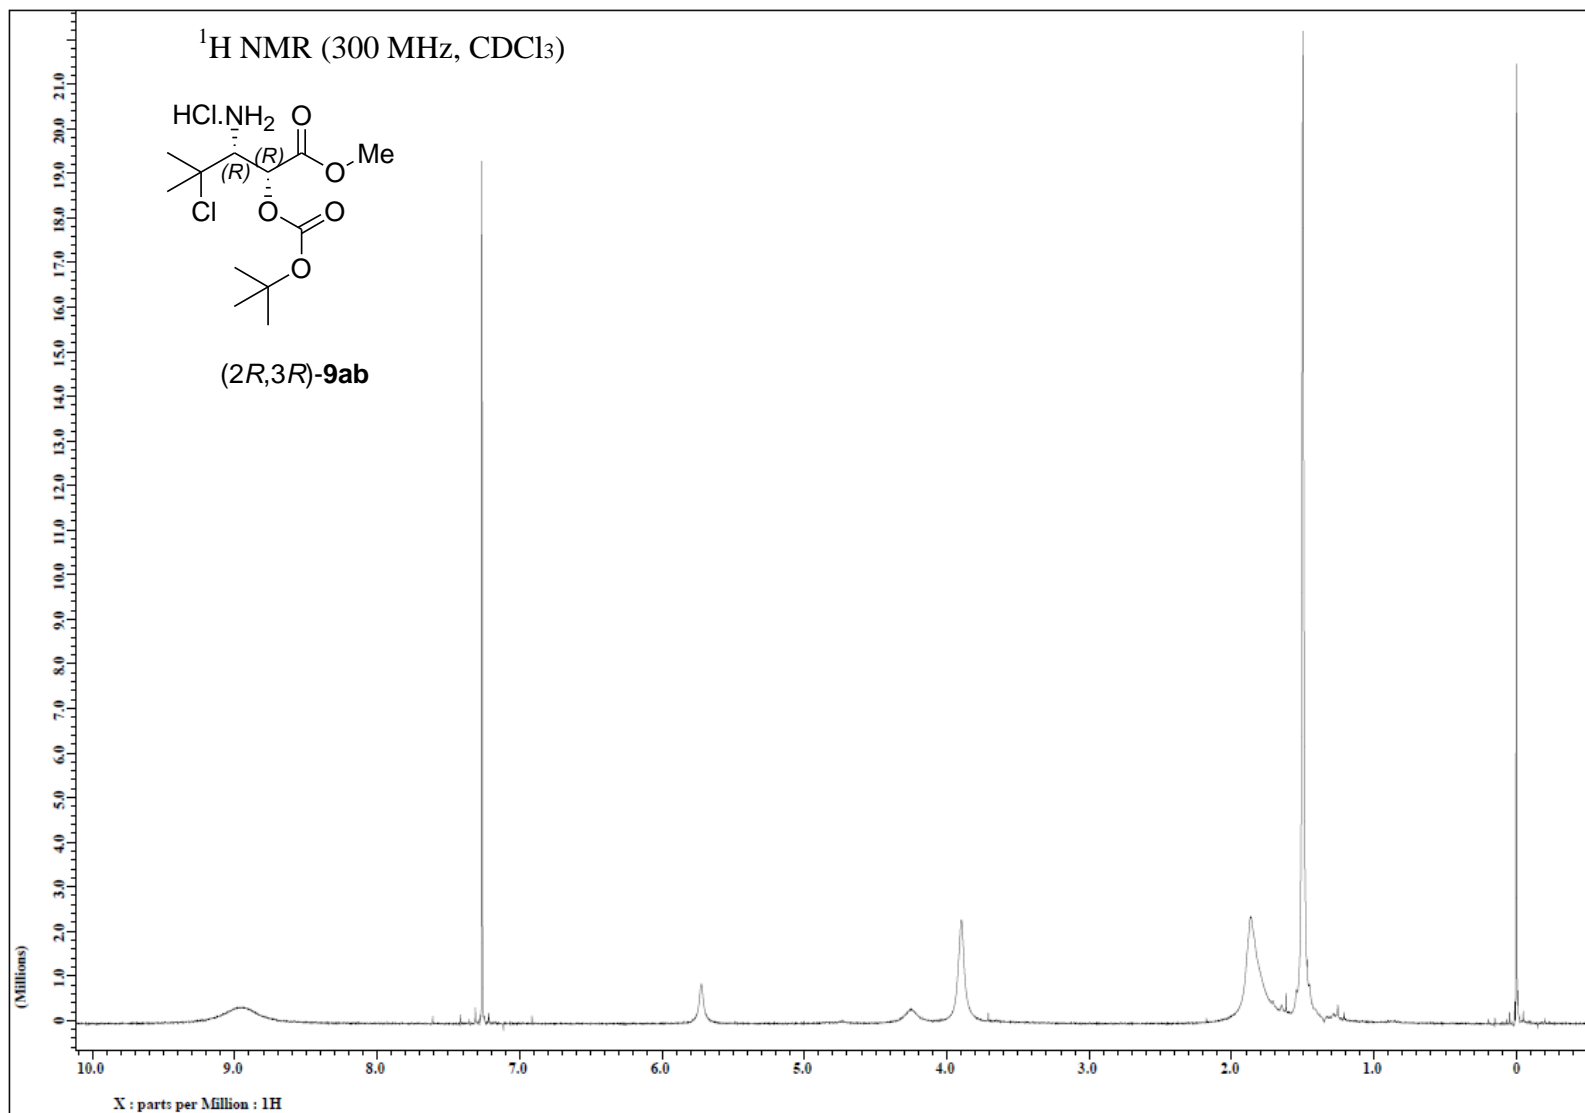

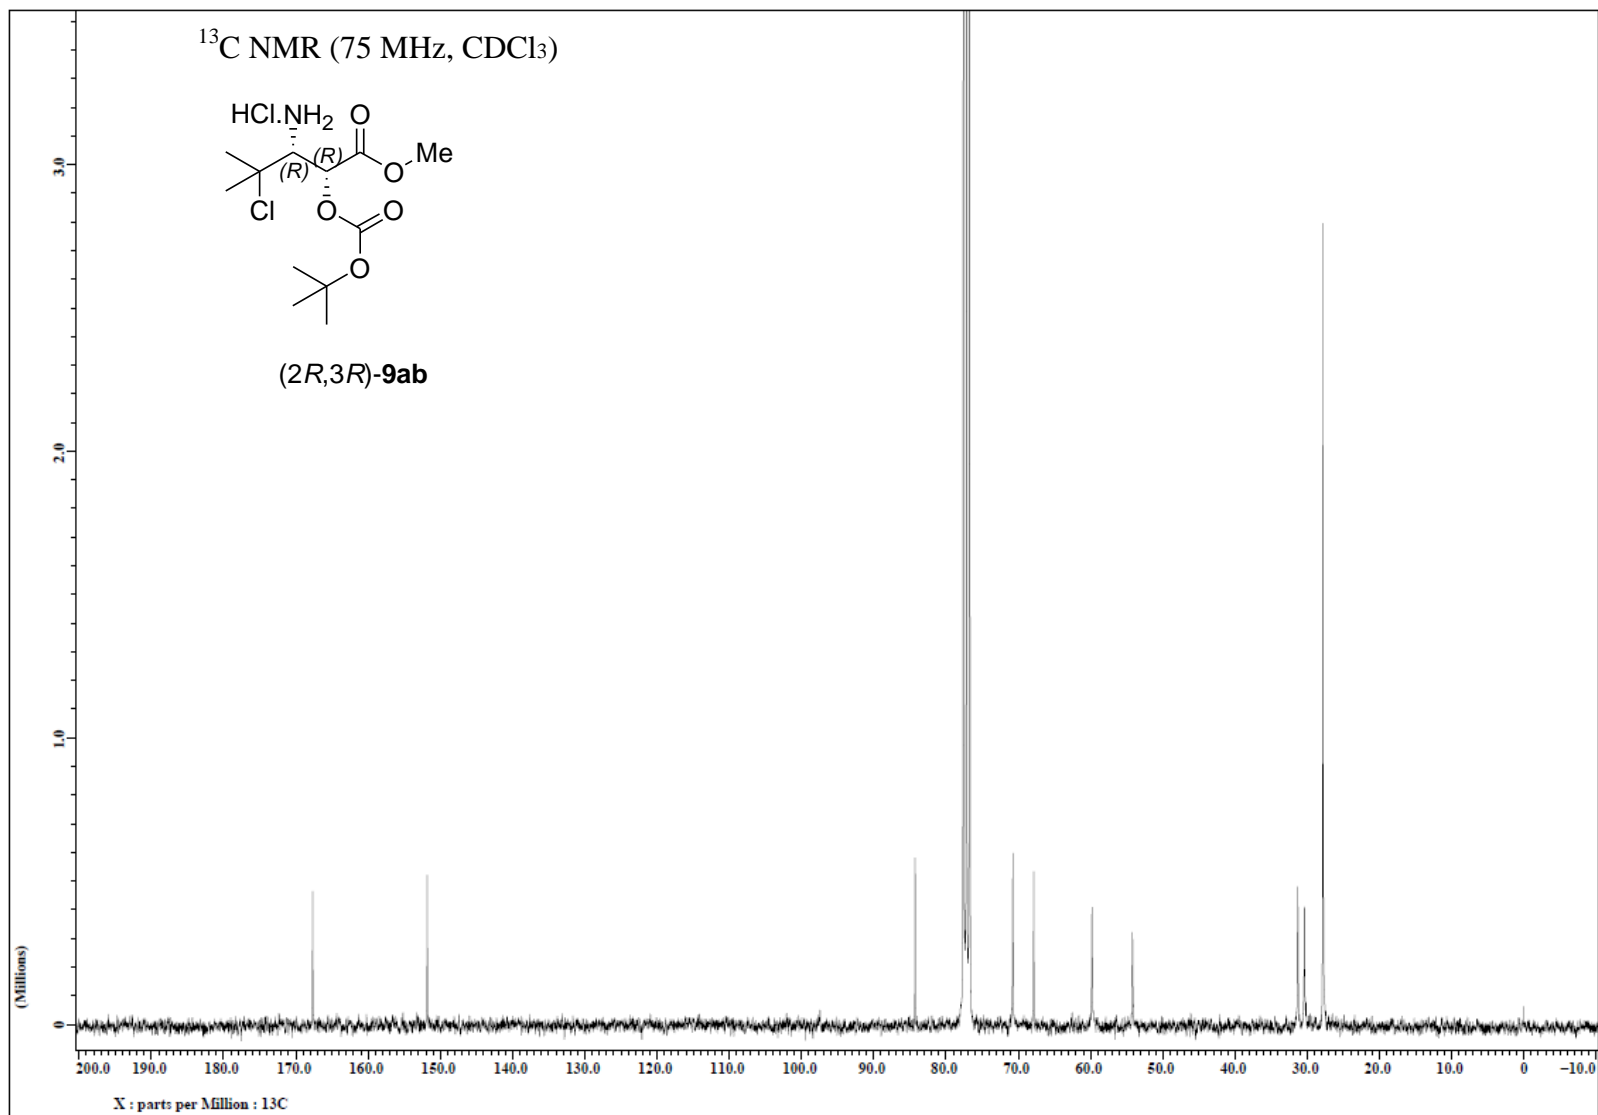



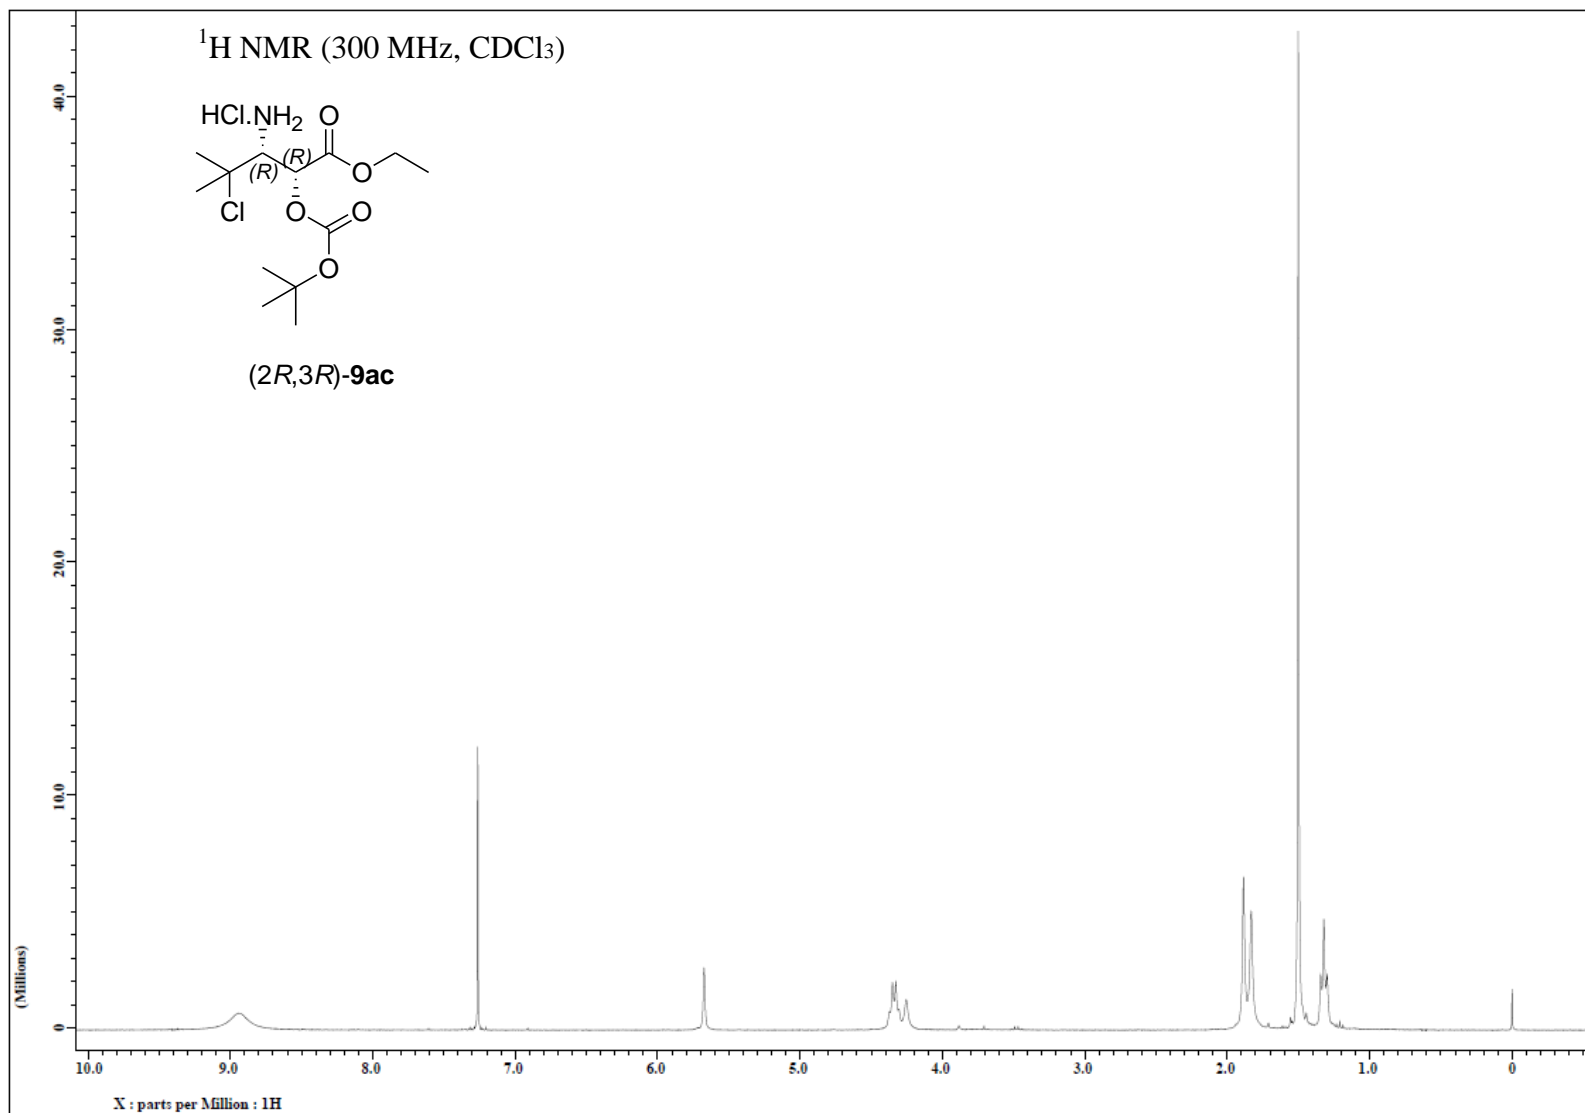

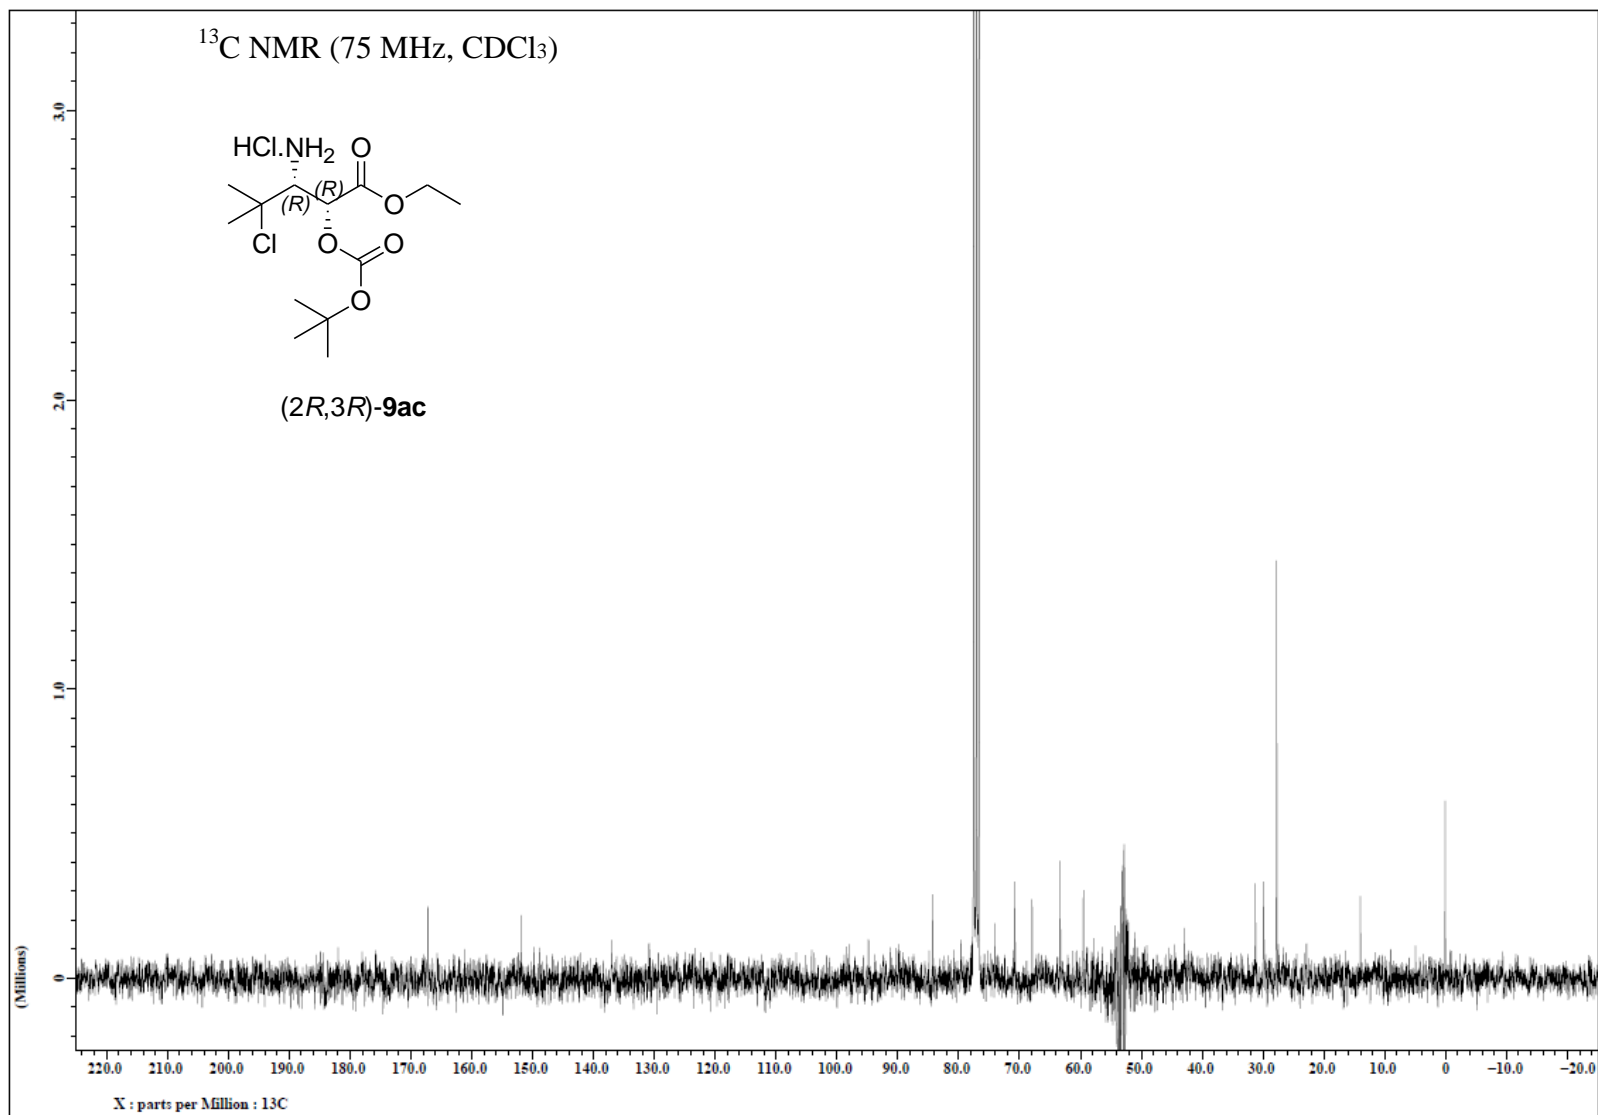

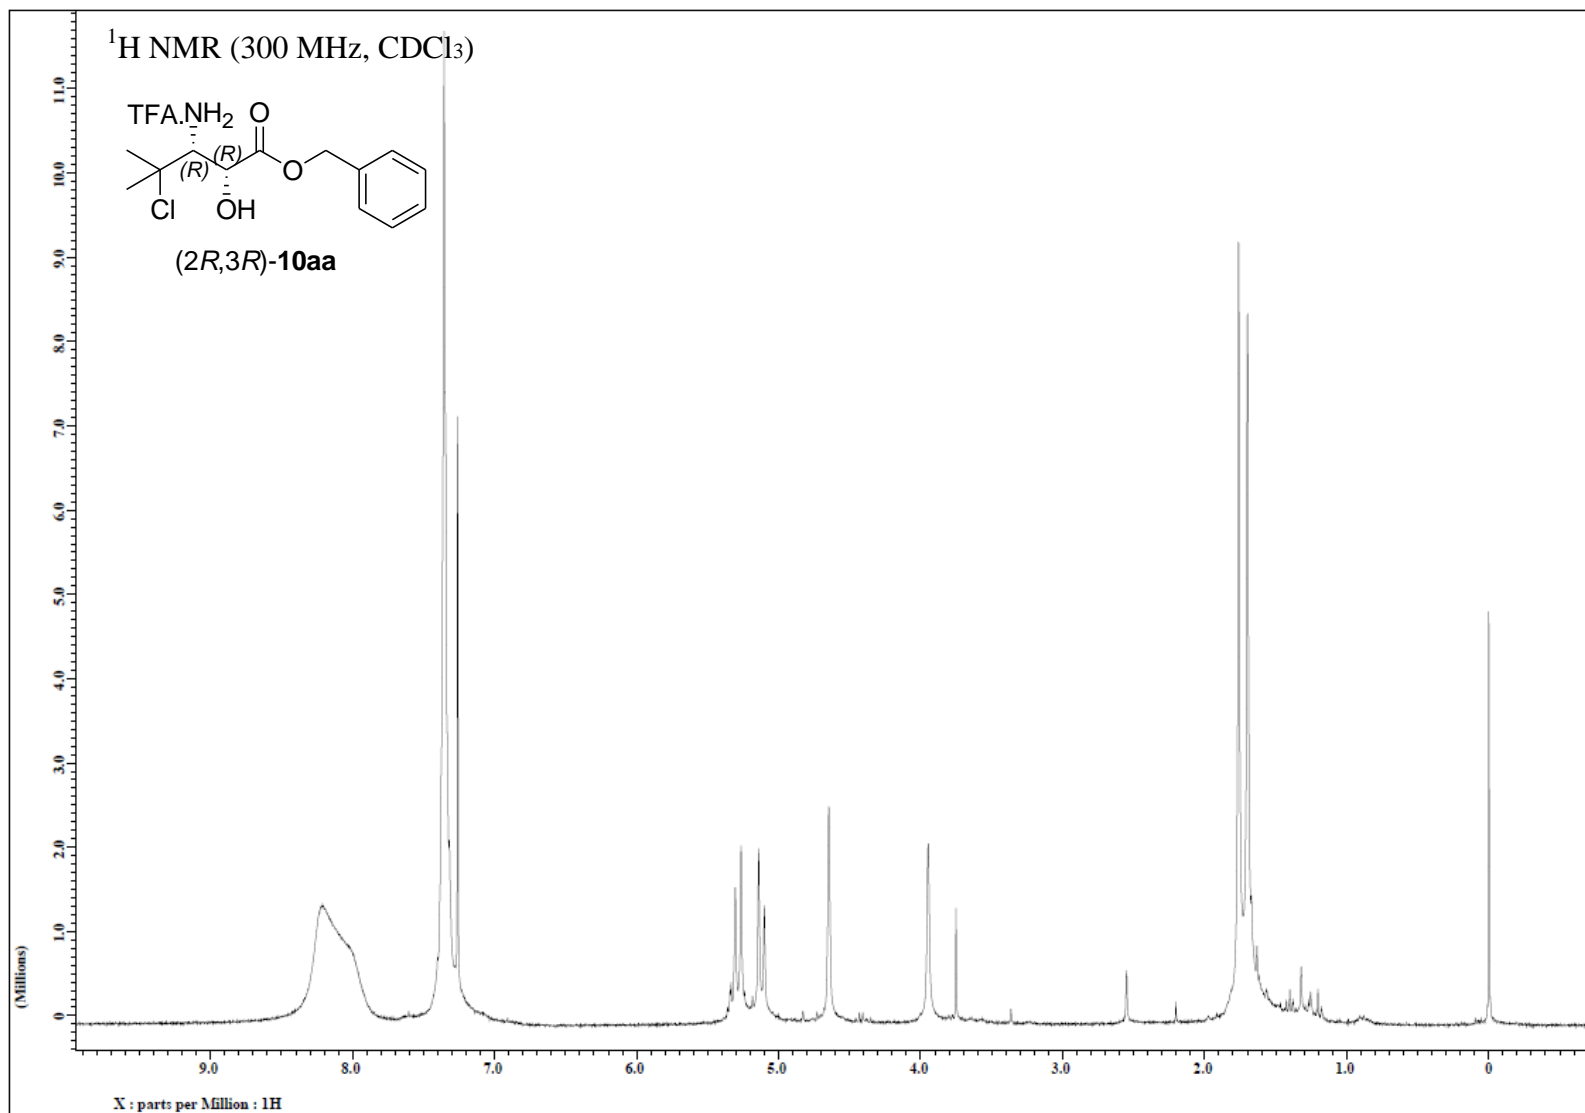

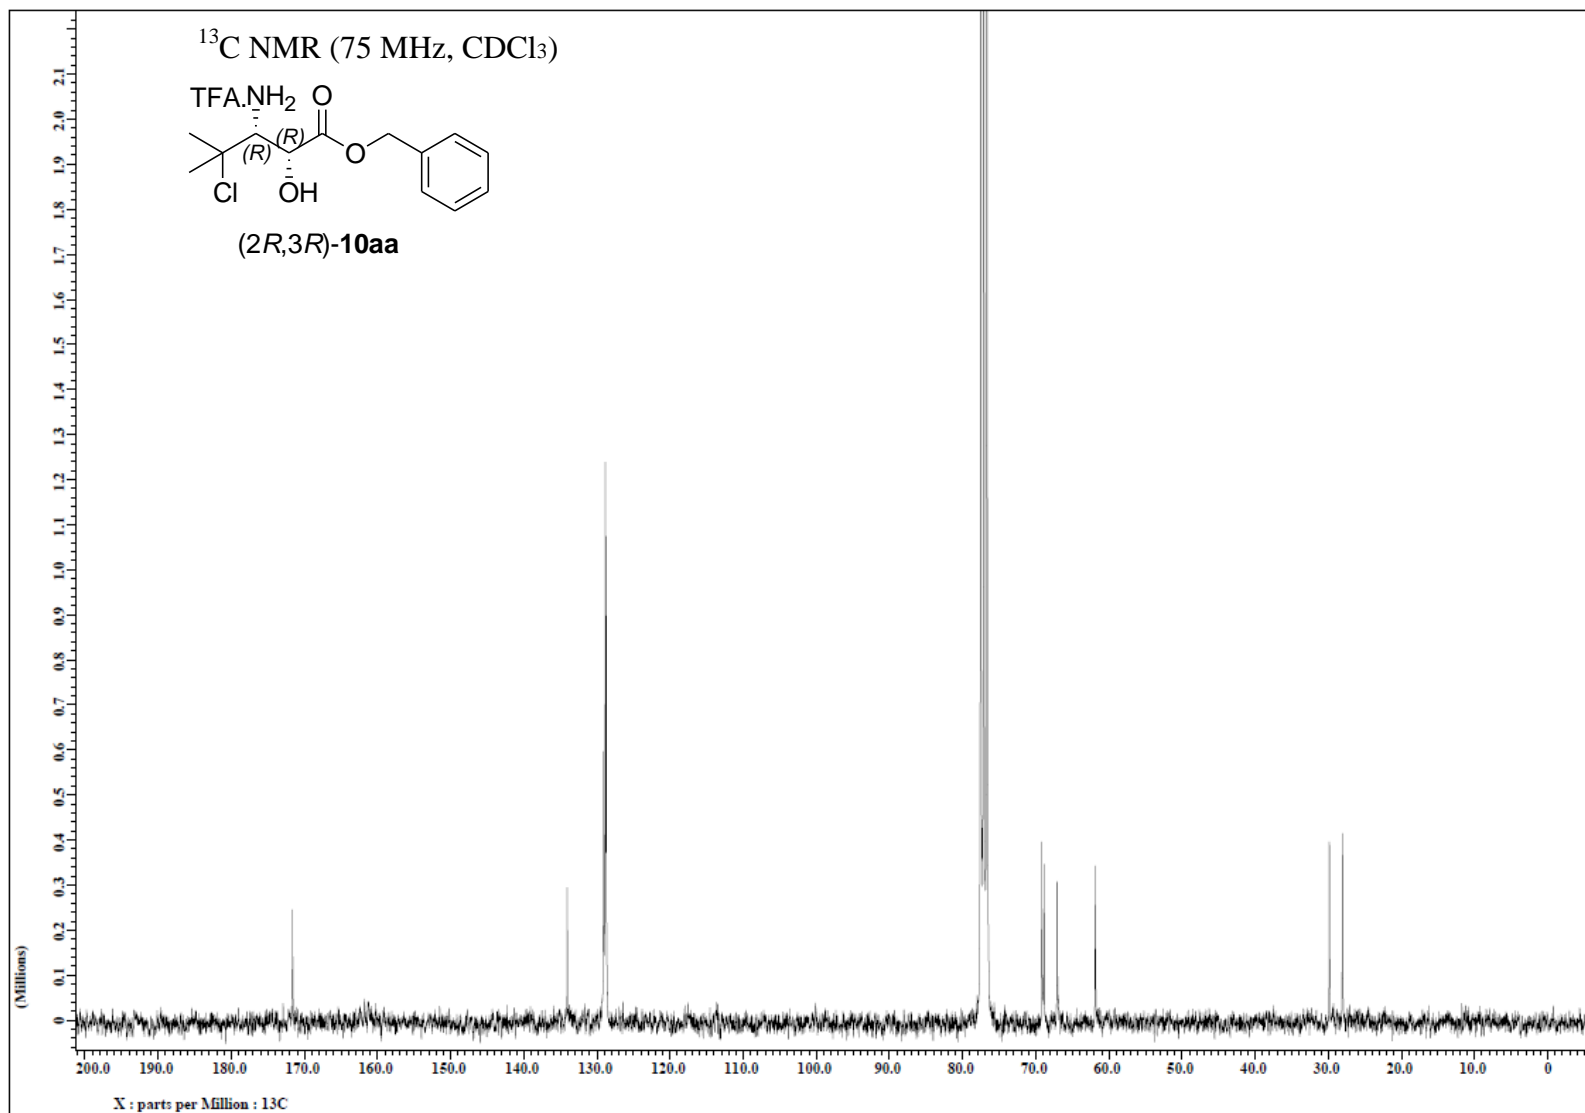

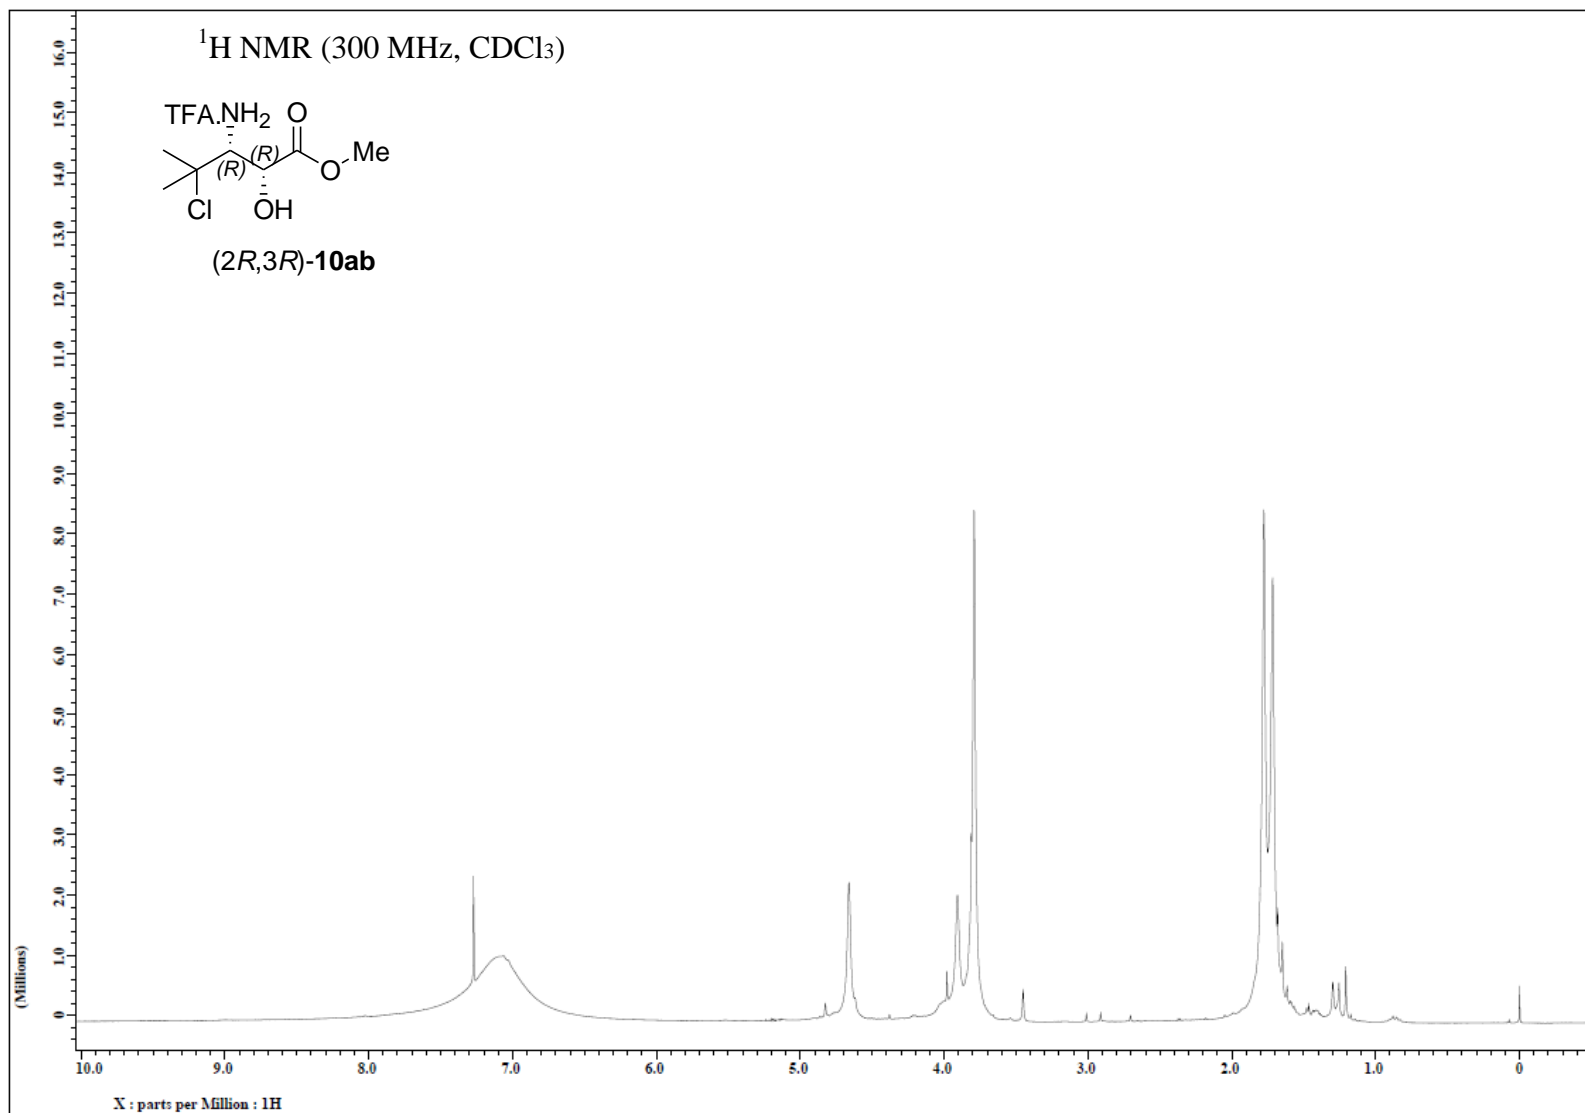

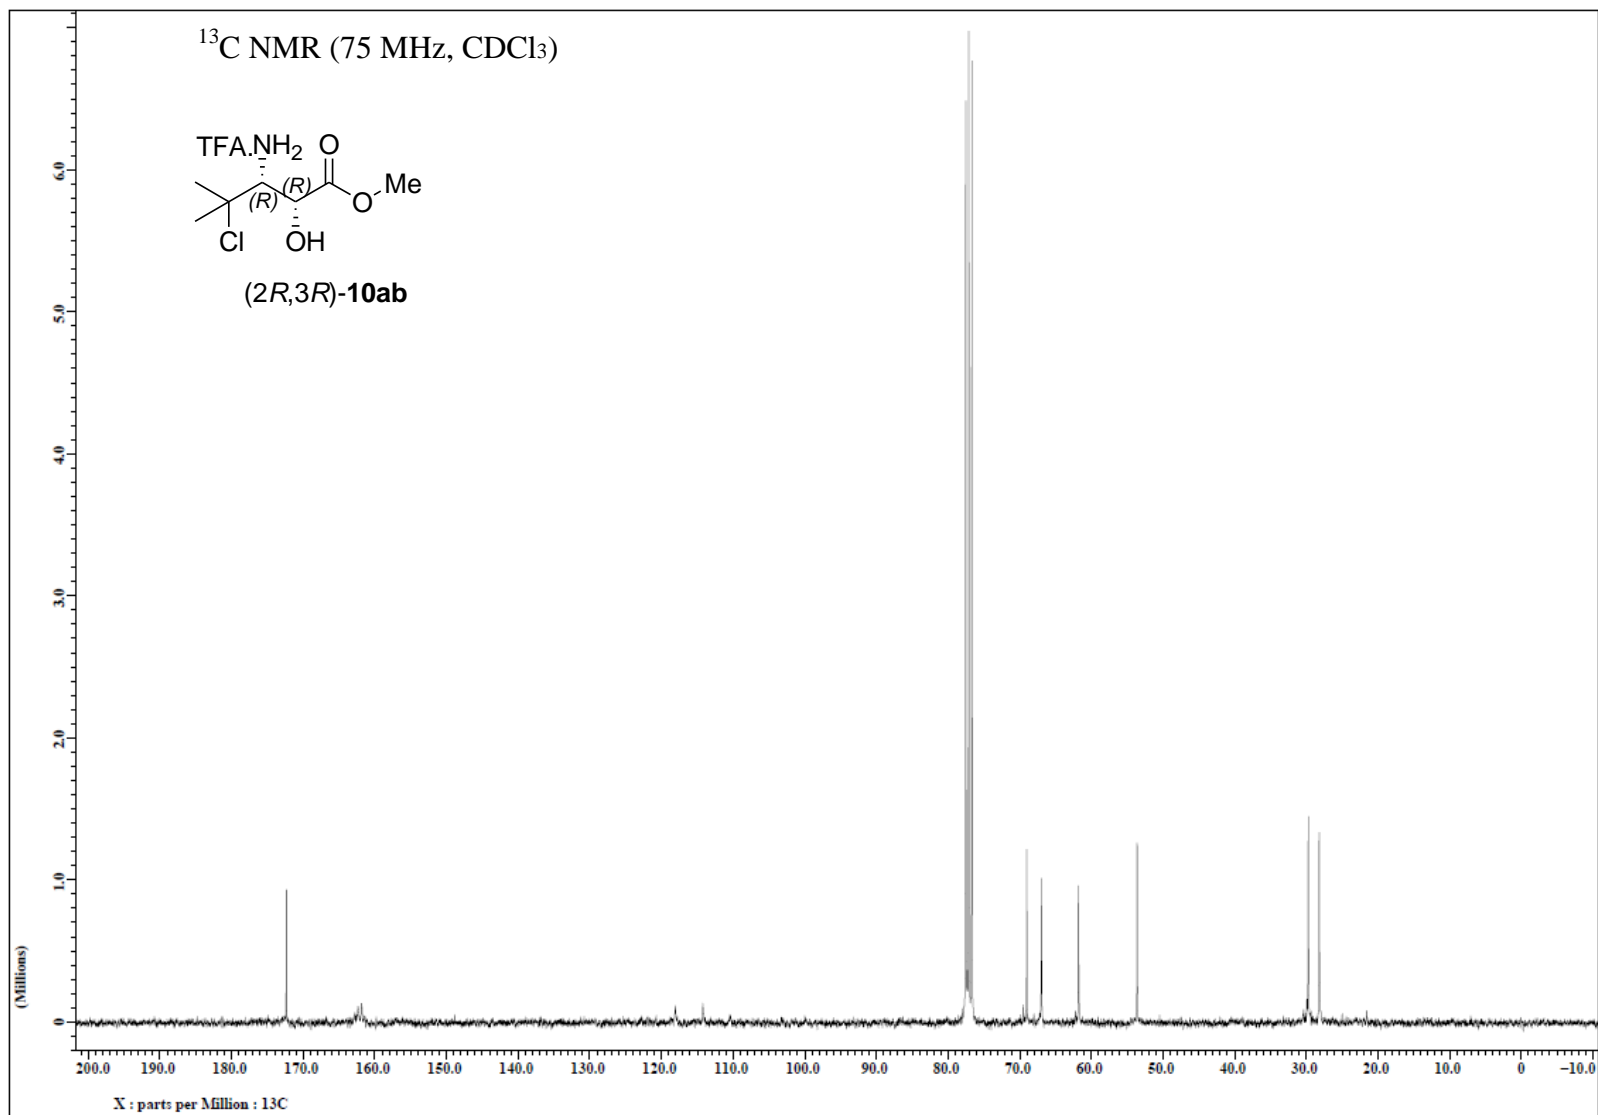

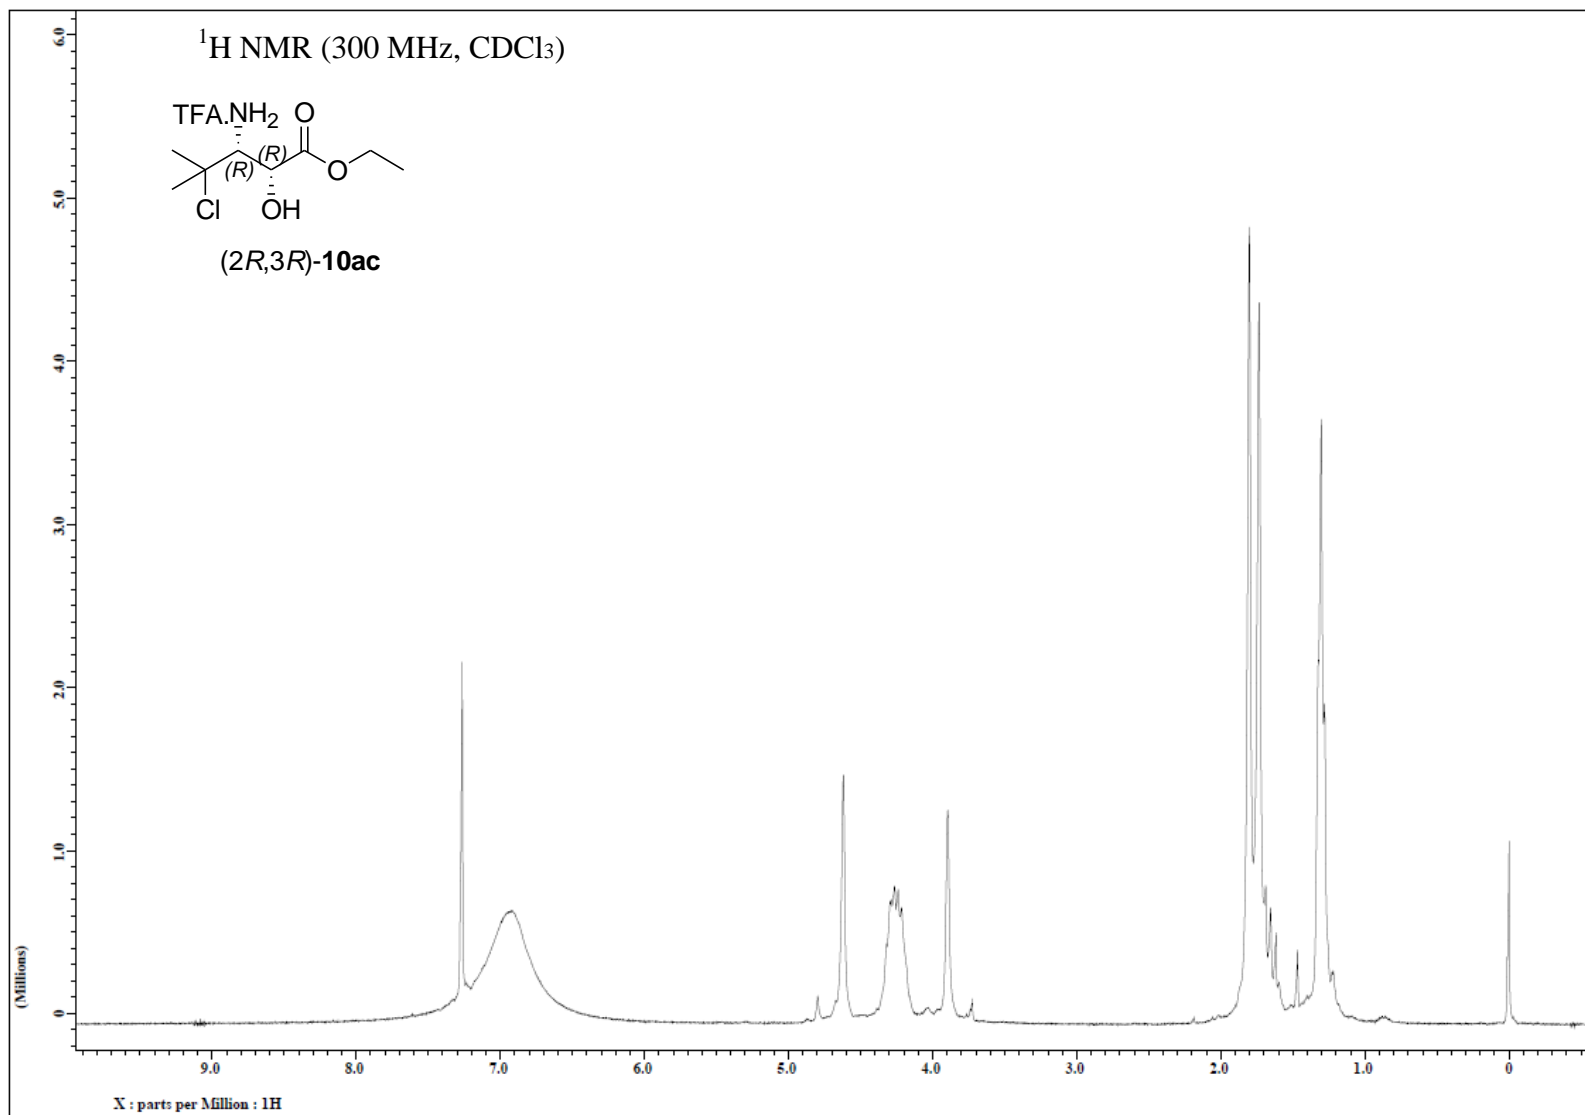

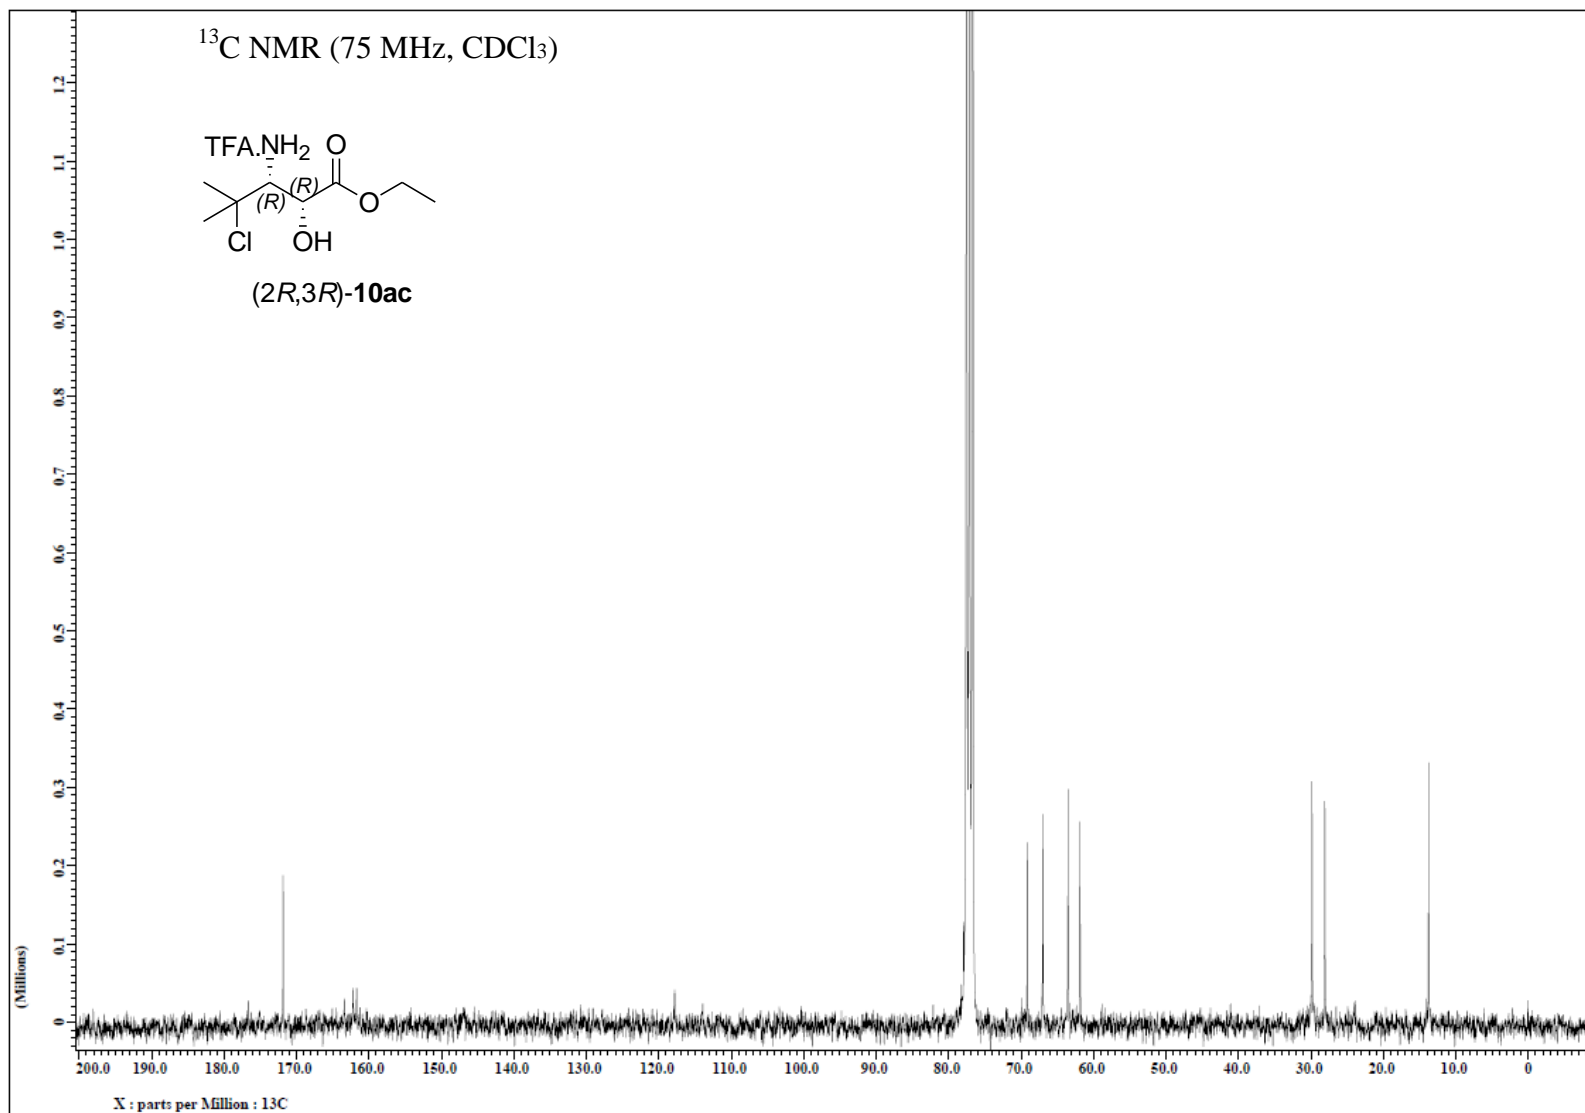



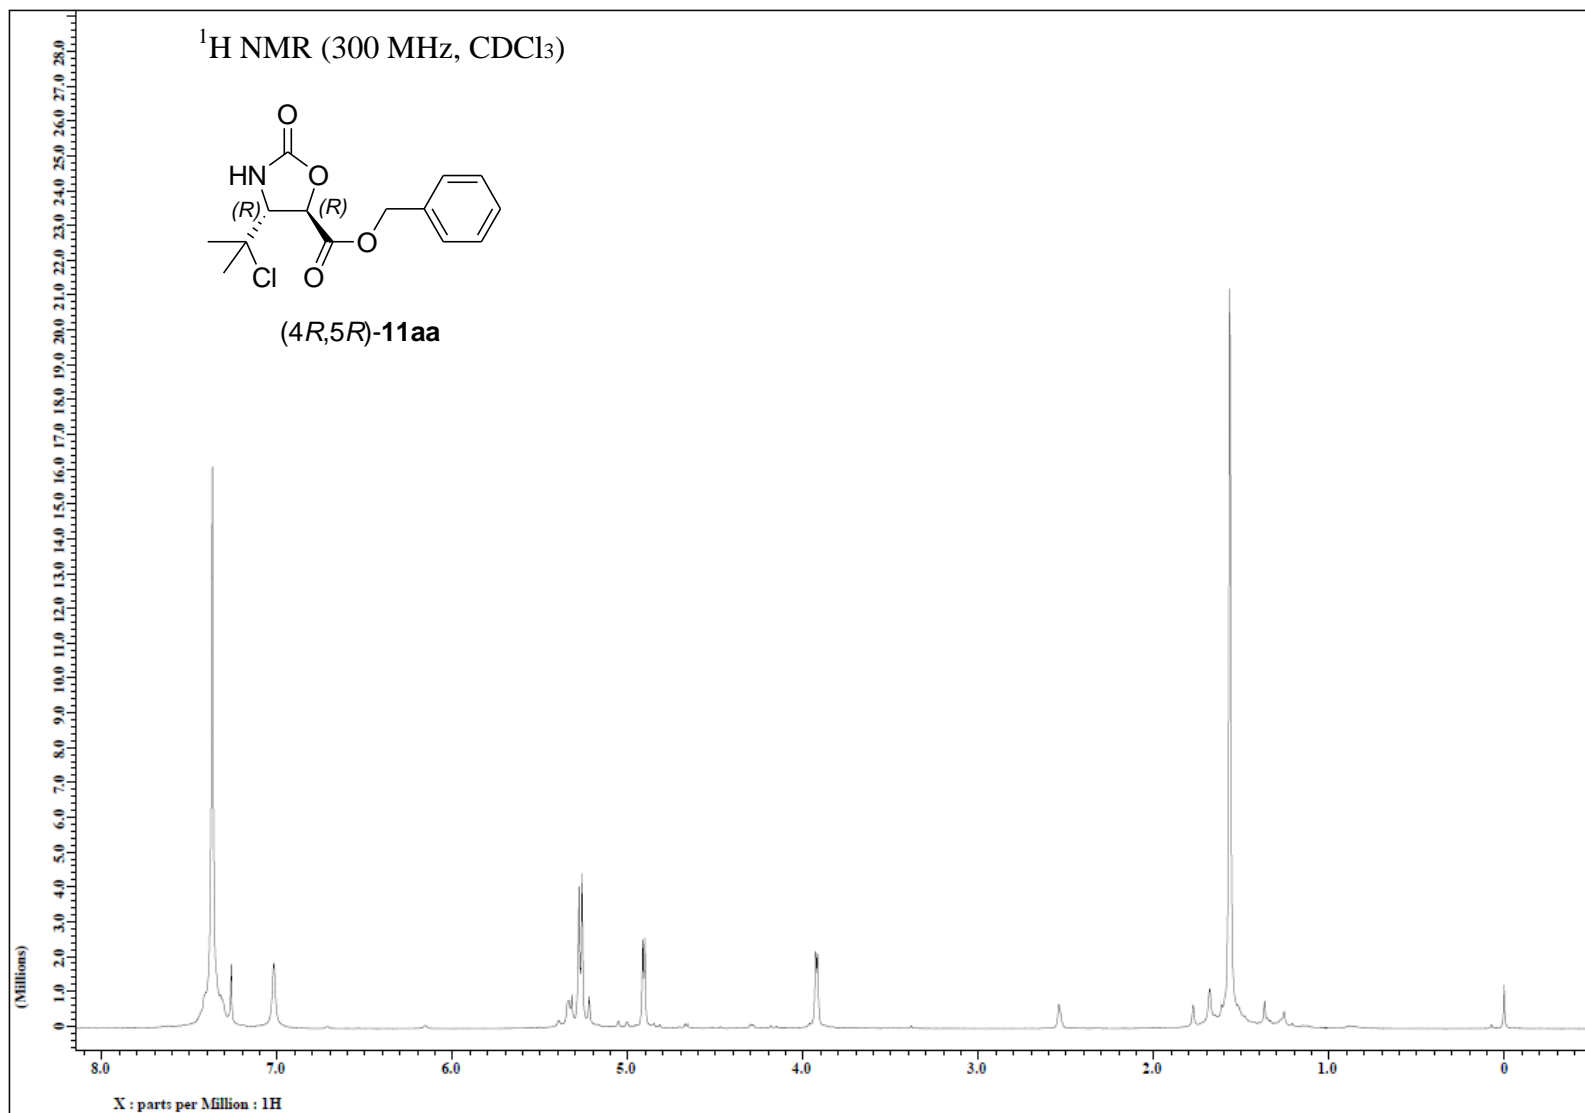

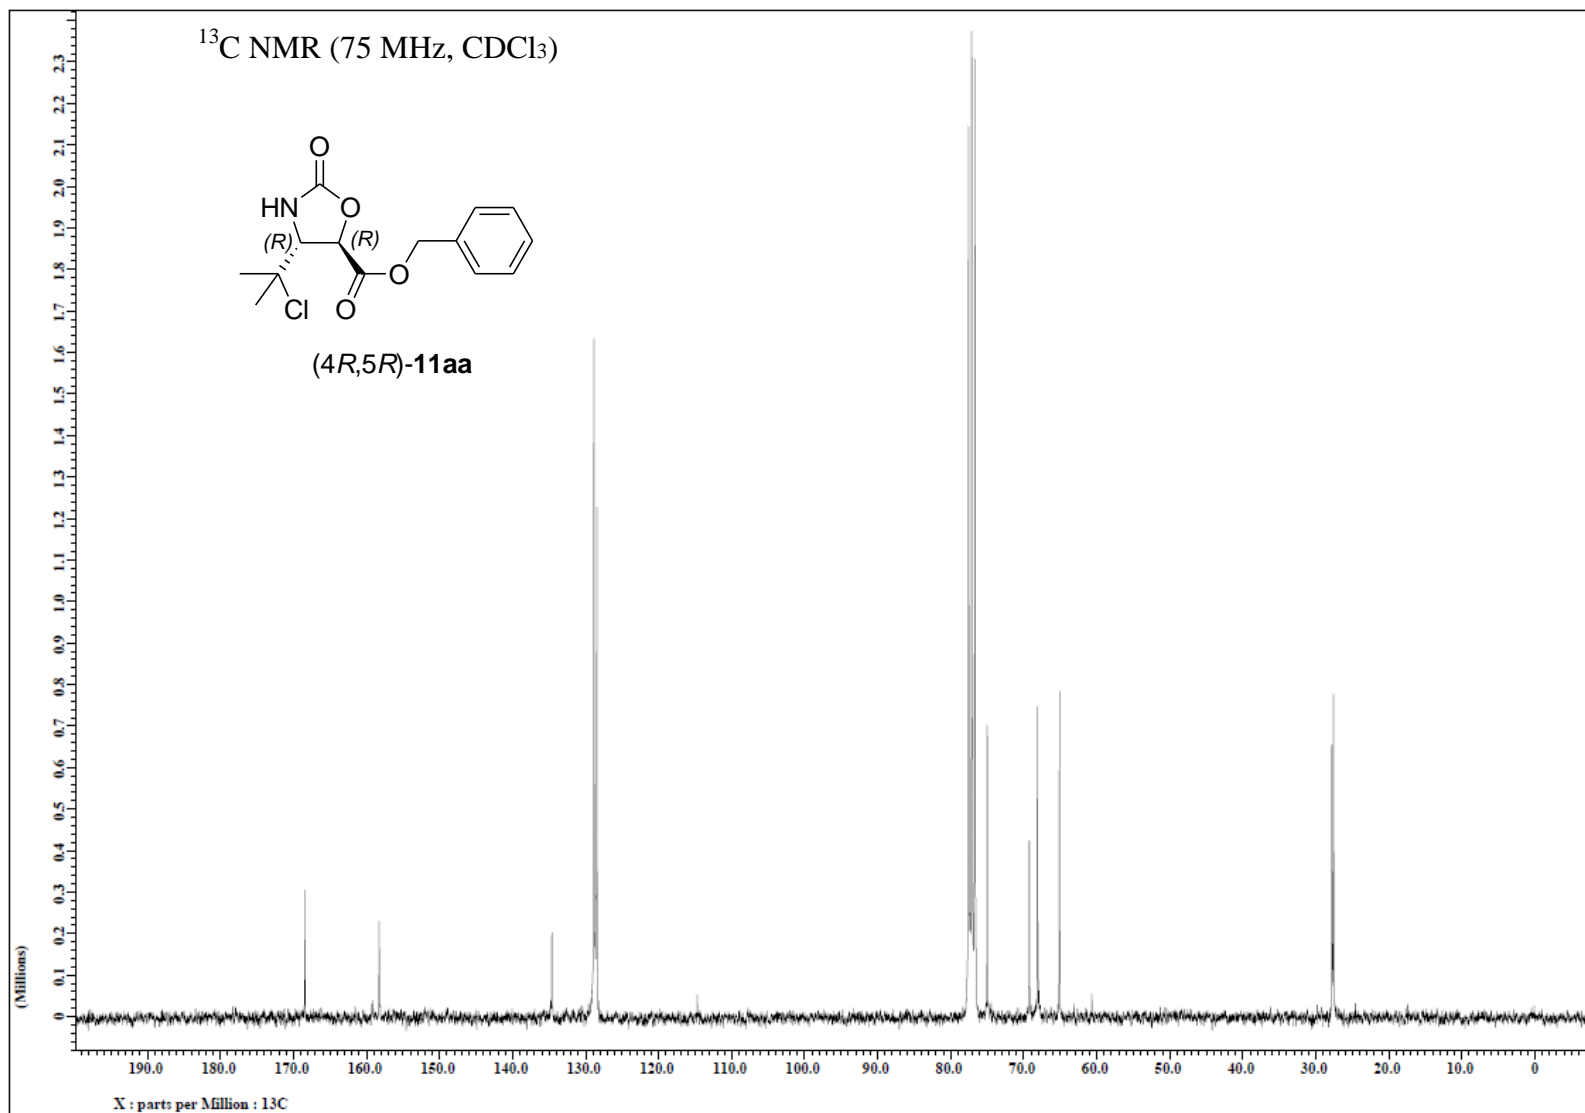

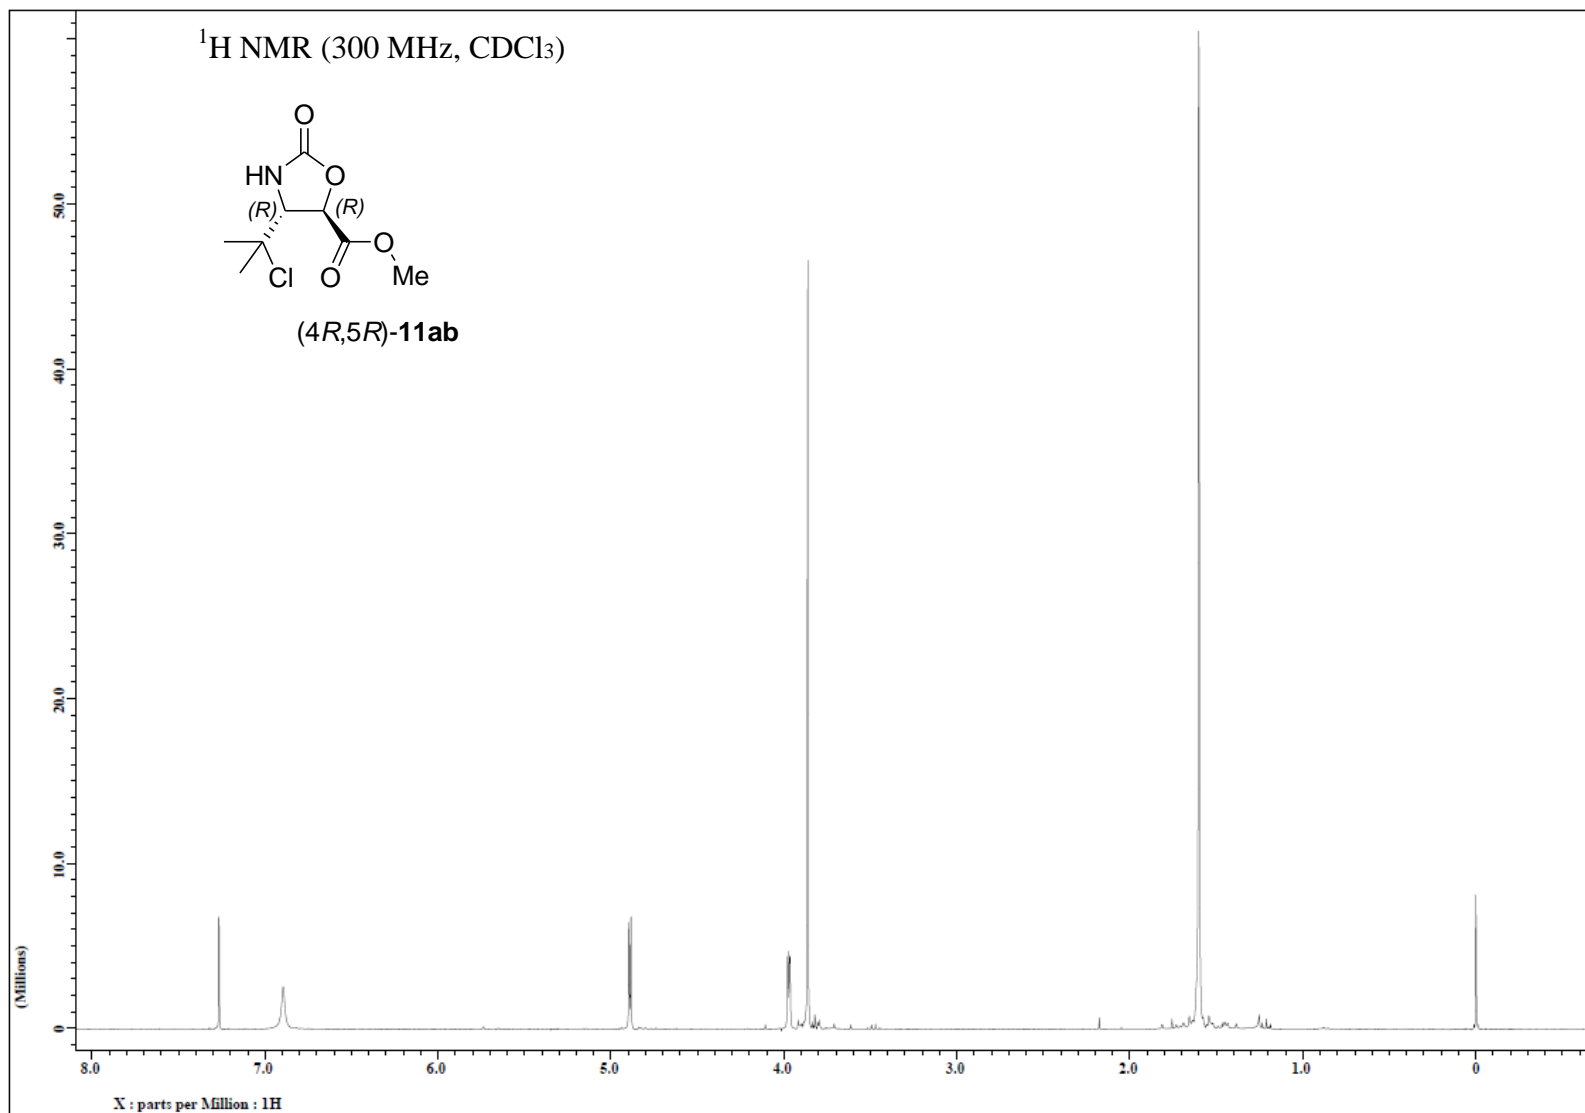

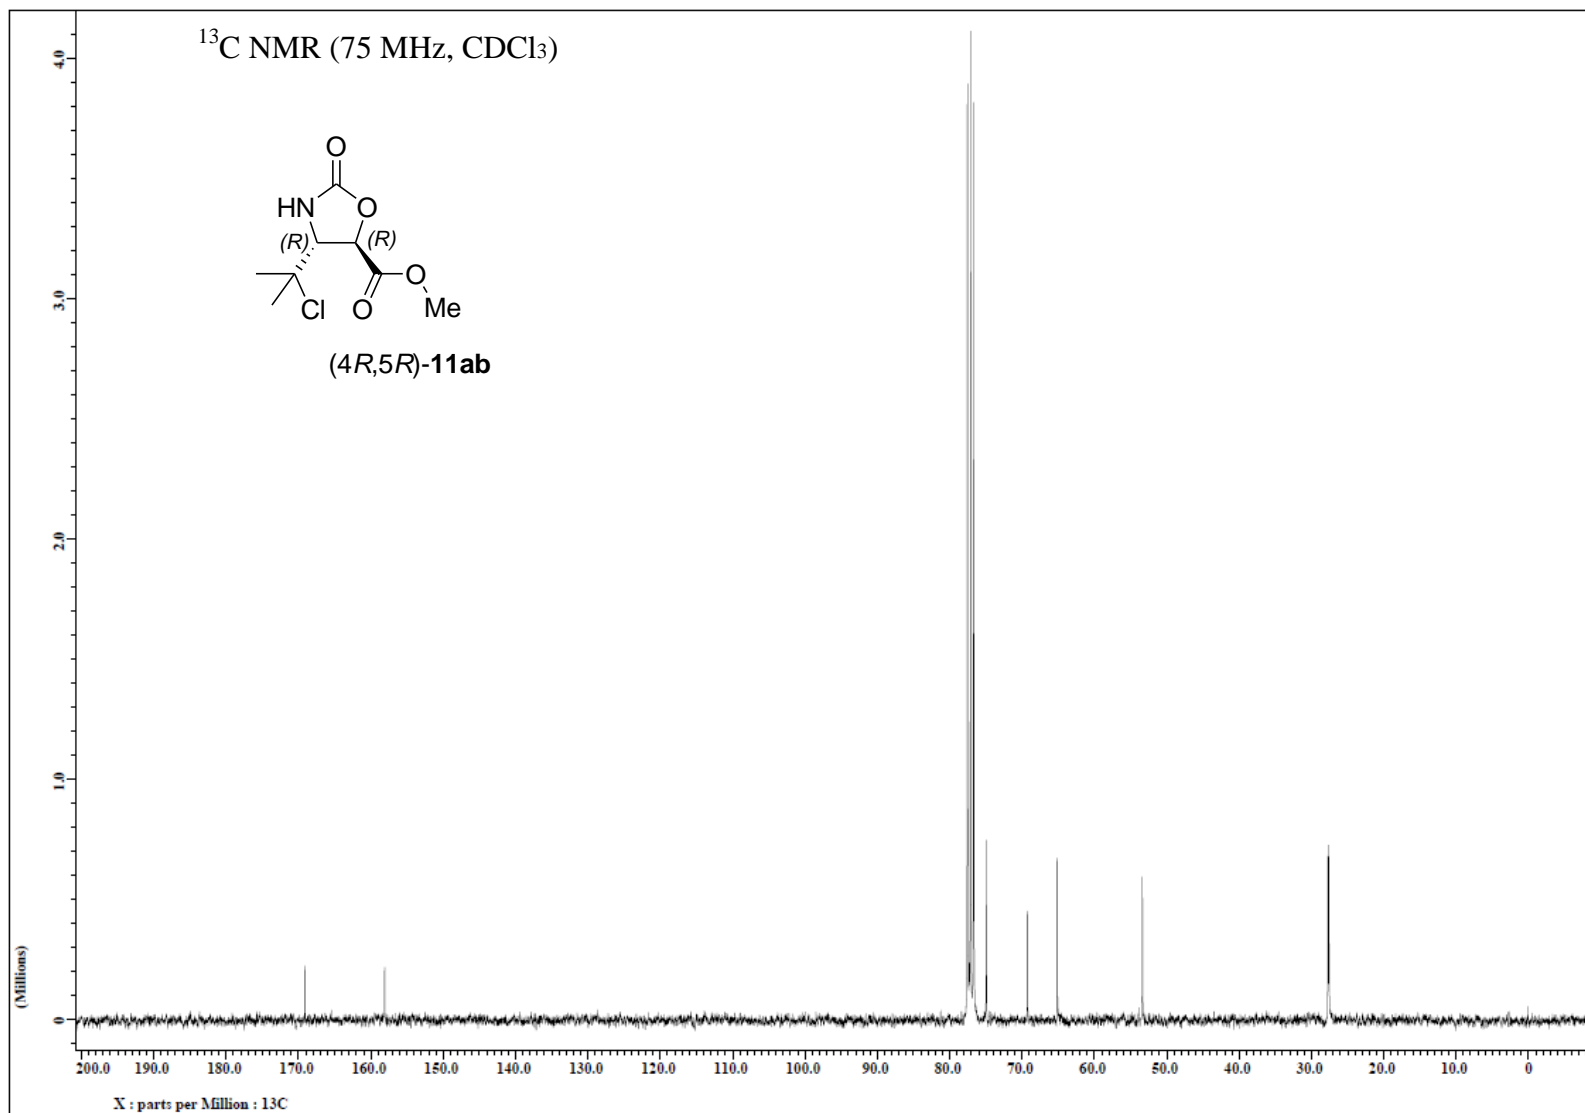

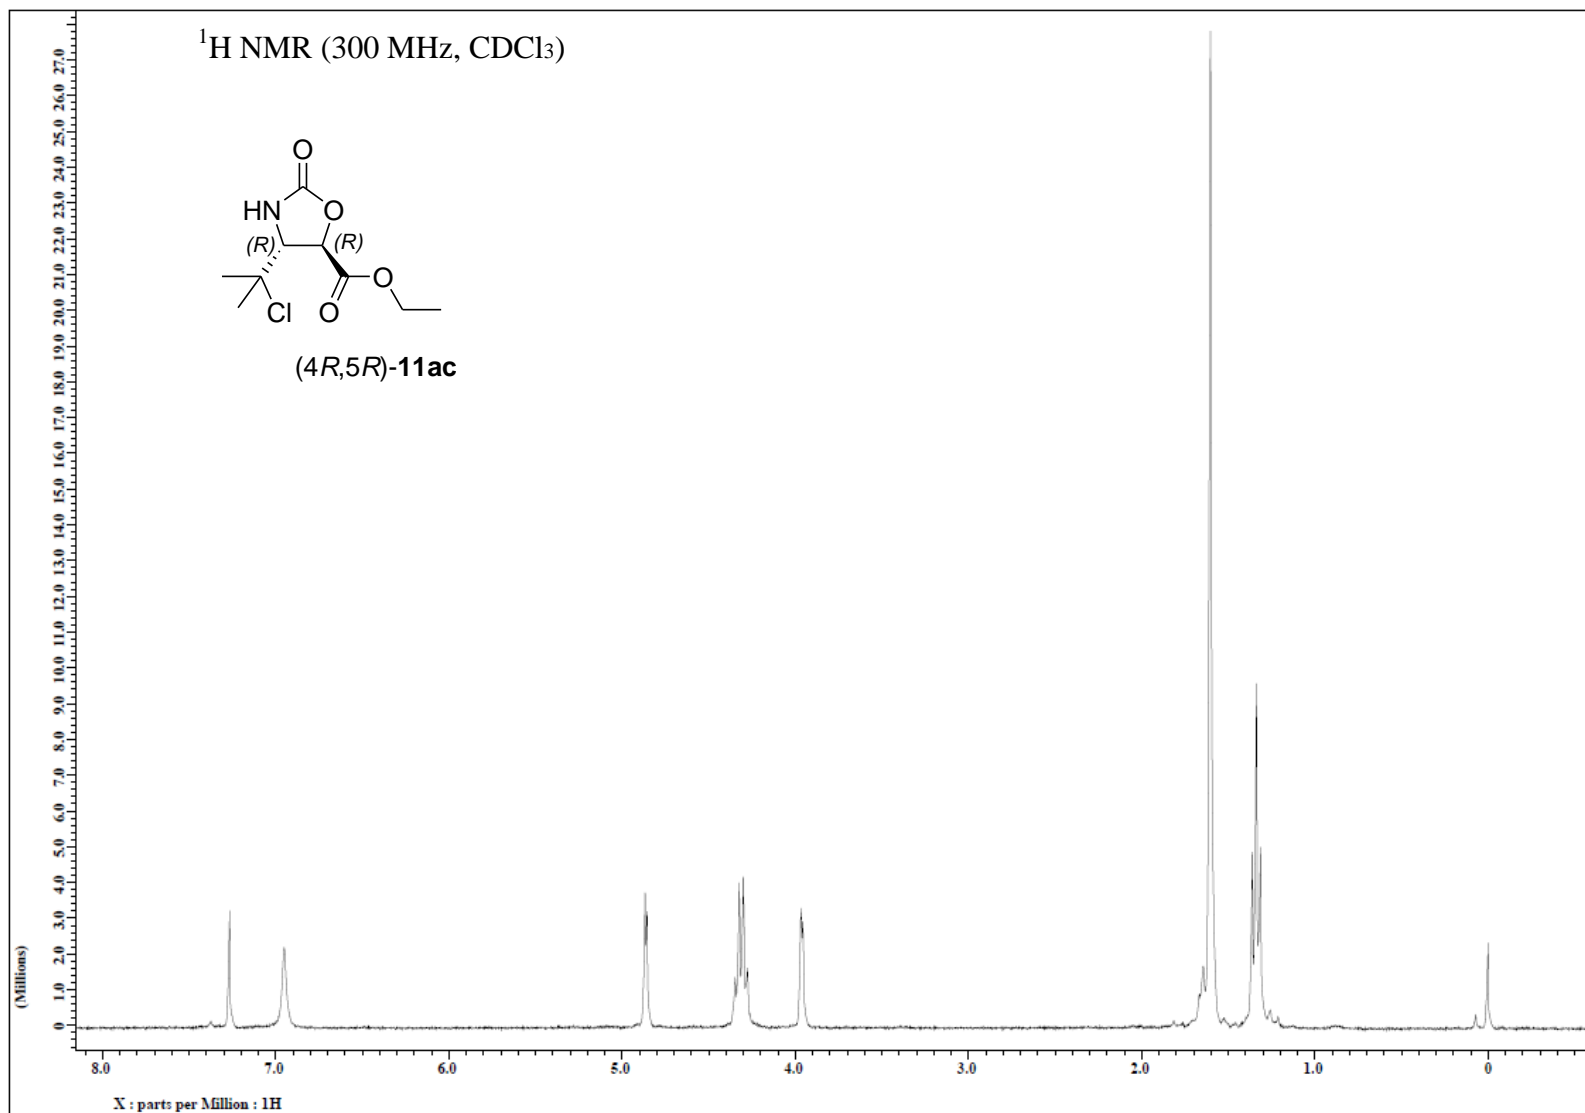

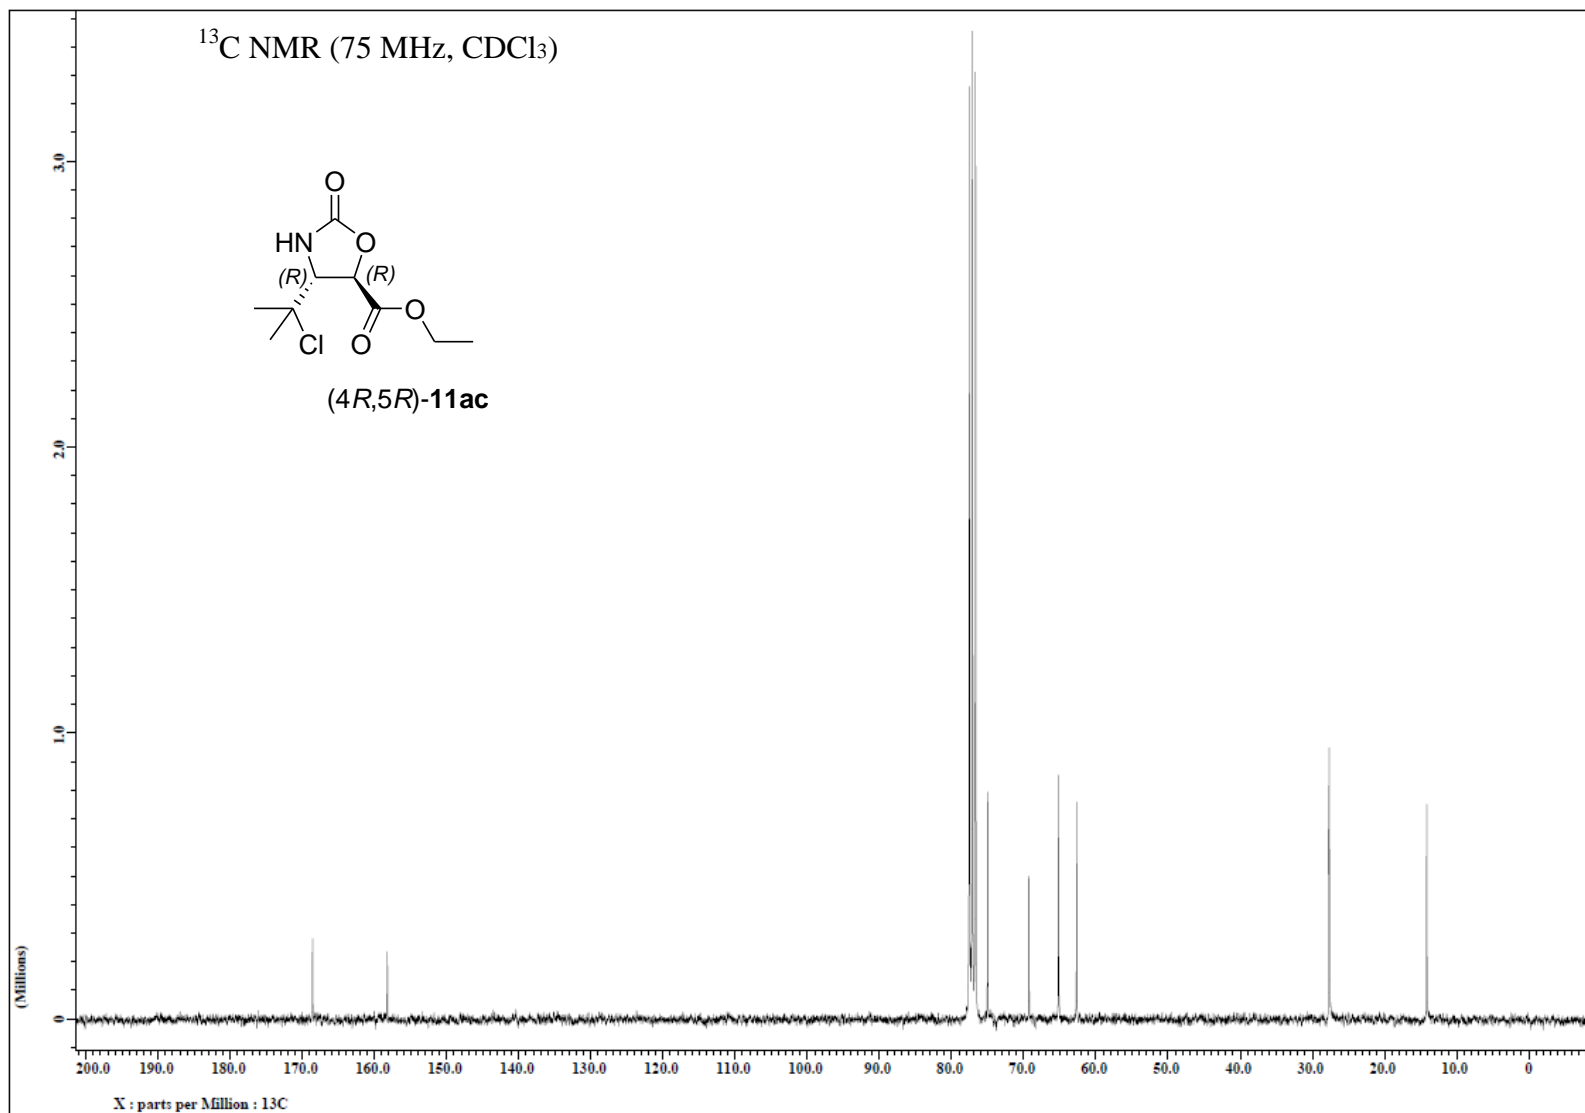

Supplement: c4ob00243a1.pdf [file c4ob00243a1.pdf]
